# Supplementary material for: Identification and validation of quantitative trait loci for chlorophyll content of flag leaf in wheat under different phosphorus treatments
Source: Front Plant Sci. 2022 Nov 17;13:1019012. doi: 10.3389/fpls.2022.1019012 (PMC9714299; doi:10.3389/fpls.2022.1019012)
Supplement: Supplementary file 2 [file DataSheet_2.xlsx]

## Sheet: Phenotypic Data
Appendix A: Chlorophyll contents of flag leaves at four stages under three phosphorus conditions
	CK1_S1	CK1_S2	CK1_S3	CK1_S4	MP1_S1	MP1_S2	MP1_S3	MP1_S4	LP1_S1	LP1_S2	LP1_S3	LP1_S4	CK2_S1	CK2_S2	CK2_S3	CK2_S4	MP2_S1	MP2_S2	MP2_S3	MP2_S4	LP2_S1	LP2_S2	LP2_S3	LP2_S4
Line1	54.725	57.925	54	34.05	55.075	51.275	43.5	3.3	53.75	53.4	35.225	5.35	48.225	52.8	54.325	37.975	49.175	52.75	52.075	3.3	53.4	50.5	52.075	13.425
Line2	55.675	58.75	53.775	29.5	51.025	52.075	50.35	4.925	53.6	50.275	40.925	5.875	49.5	52	52.15	35.325	54.2	55.55	52.6	4.925	50.025	50.625	44.1	8.475
Line3	51.85	51.75	47.175	16.05	50.775	53.4	42.5	8.55	52.475	51.3	49.25	16.925	51.65	51.65	48.075	35.15	53.275	52.525	51.525	41.85	47.675	48.875	40.15	20.925
Line4	55	59.125	54.275	39.55	54.425	53.85	47.825	12.45	54.9	54.25	48.35	9.275	50.525	53	50.85	37.425	52.925	53.775	55	40.625	50.1	49.85	43.1	34.8
Line5	54.7	57.425	55.375	14.95	52.7	55.45	51.75	16.775	55.925	54.525	46.7	8.7	55.075	55.7	56.475	50.225	60.75	55.075	56.075	48.275	50.925	52.925	51.675	10.125
Line6	55.1	56.825	54.15	13.225	55.85	54.125	52.85	29.7	58.075	56.525	53.65	24.8	53.075	53.325	50.8	25.9	54.825	53.625	54.75	14.1	49.925	49.325	32.625	3.575
Line7	55.4	56.45	53.975	45.775	57.3	50.875	45.975	1.4	55.45	59.225	57.275	38.7	51.25	54.825	57.85	49.425	54.875	55.25	50.025	47.4	51.175	53.175	46.125	28.125
Line8	52.325	54.7	53.35	18.425	49.4	55.125	57.65	40.825	54.55	52.6	41.625	24.725	52.275	53.125	51.125	46.175	51.75	52.175	46.35	20.475	49.225	50.65	44.275	37.8
Line9	54.9	51.375	49.025	8	48.75	56.3	46.725	24.125	53.525	51.325	47.15	14.125	54.875	53.375	51.65	22.475	53.825	55.825	50.375	18.4	49.625	50.5	39.575	6.9
Line10	53.725	55.1	47.85	28.25	53.575	51.5	41.275	19.925	52.175	52.3	38.225	5.65	51.925	51.9	50.075	12.925	51.45	51.625	47.85	14.05	50.525	51.075	35.75	3.925
Line11	56.3	54.175	51.275	27.125	54.325	52.75	44.25	6.525	55.1	53.05	52.625	4.7	52.975	56.05	51.775	22.1	54.225	55.55	53.8	21.775	54.625	54.375	43.825	13.05
Line12	56	58.925	56.725	24.65	51.125	54.525	46.2	19.375	55.925	58.775	53.125	17.75	55.475	58.375	49.35	46.25	56.925	55.05	54.05	21.225	51.8	54.425	46.675	16.675
Line13	51.725	55.65	55.975	16.625	53.3	54.2	49.275	2.525	55.275	51.075	37.7	3.475	55.425	57.2	53.2	47.45	60.025	51.625	52.125	35.55	55.125	54.35	45.875	17.275
Line14	53.025	54.375	50.3	28.55	56.725	56.975	50.2	2.3	49.675	51.95	49.4	15.05	53.725	58.75	53.975	48.35	55.95	54.275	50.325	51.35	51.375	51.8	46	11.5
Line15	50.375	55.275	53.8	14.2	52.275	53.25	56.175	7.55	49.925	51.15	48.925	8.775	52.325	56	52.725	45.925	53.875	55.95	52.625	22.125	51.65	51.925	40.775	3.15
Line16	51.725	58.05	53.15	26.65	50.275	53.225	46.85	4.85	51.425	51.275	35.475	1.675	53.725	55.2	54.2	25.8	54.4	52.275	52.25	31.625	53.4	53.025	47.475	12.775
Line17	54.325	57.925	52.35	14.075	51.225	56.75	48.625	6.675	54.3	52.3	53.325	15.125	54.775	55.1	50.175	43.375	53.3	53.275	54.425	41.725	51.1	50.275	43.775	2.825
Line18	56.975	58.325	55.125	44.325	53.575	56.15	52.725	8.575	52.525	53.15	50.7	5.225	57.15	56.3	51.9	38.85	55.775	54.3	54.6	52.575	53.75	53.575	49.175	14.95
Line19	57.925	61.575	53.7	44.925	55.225	59.5	51.725	10.025	55.225	55.175	44.675	7.525	57.625	53.975	52.225	51.775	56.325	58.875	54.825	52.725	53.225	53.75	44.075	35.675
Line20	55.45	56.775	49.1	16.025	54.275	59.275	52.25	38.625	54.55	55.075	51	13.7	54.475	54.525	53	44.3	55.275	52.575	51.05	10.525	57.1	52.15	45.45	7.2
Line21	50.06	60.425	49.775	19.625	54.675	52.15	56.225	38.35	52.425	57.95	30.325	4.75	55.1	59.1	52.75	41.125	54.625	54.675	54.35	17.9	53.35	55.125	51.475	5.775
Line22	53.25	53	46.875	3.725	54.85	58.1	41.125	4.625	49.3	54.125	46.275	8.225	49.975	51.65	48.6	41.225	52.4	49.95	50.325	39.2	55.575	48.675	45.975	23.625
Line23	58.3	61.925	50.1	5.075	55.75	58.2	57.85	45.375	51.85	51.625	46.75	6.55	48.775	52.775	51.925	24.45	53.425	56.725	52.9	15.25	55.775	53.725	50.5	13.275
Line24	54.2	54.45	53.775	26.4	57.075	58.925	56.375	43.775	51.4	52.975	34.35	5.325	53.725	56.775	54.625	42.525	54.65	56.95	53.25	50.975	55.45	54.1	46.225	23.6
Line25	57.05	53.65	54.775	52.35	56.675	61.175	54.8	41.775	50.475	51.975	52.7	6.675	50.325	54.3	54.925	44.975	56.825	57.6	53.95	50.875	54.4	54.1	43.3	15.175
Line26	52.5	56.575	54.3	25.675	55.14	56.65	57.025	46.55	51.425	52.375	39.625	9.725	56	55.4	54.8	38.175	54.52	54.5	54.8	48.775	51.325	55.675	50.85	13.225
Line27	50.2	53.75	49.975	22.025	56.3	61.275	42.45	36.225	50.1	47.875	47.725	2.975	54.6	53.05	50.95	36.125	52.325	52.45	54.025	48.075	51.5	51.325	49.9	12.2
Line28	53.525	52.625	52.425	25.8	53.725	54.5	46.1	3.15	50.6	47.075	41.9	2.2	48.55	52.725	48.975	30.35	49	53.35	48.725	22.575	48.85	47.575	44.075	5.15
Line29	58.975	57.55	53.35	2.875	50.9	55.05	44.575	23.25	51.025	52.275	35.95	2.725	54.7	55.625	53.775	12.4	56.825	55.05	53.5	5.875	55.175	51.65	16.65	3.55
Line30	55.275	57.85	53.6	34.925	55.5	55.35	43.25	1.55	54.7	51.475	35.125	2.725	55.225	56.225	57.675	48.6	54.575	52.15	53.025	31.35	51.875	51	38.025	2.3
Line31	56.05	59.25	51.8	40.875	57.05	54.725	53.125	18.475	52.3	53.3	38.45	4.425	52.025	53.55	49.225	30.85	52.8	50.55	48.2	12.325	52.525	49.85	42.7	3.925
Line32	55.25	59.15	51.825	34.175	56	54.15	51.5	18.775	50.575	50.275	37.075	6.85	56.775	57.2	53.425	44.425	49.625	50.675	47.275	26.225	53.4	55.375	51.025	14.65
Line33	54.25	56.075	54.15	13.975	56.225	56.575	53.825	41.8	52.25	50.4	18.95	1.6	53.275	54.85	51.1	17.625	52.675	51.125	51.15	10.05	53.475	53.125	48.175	27.925
Line34	58.775	60	53.925	16.525	57.125	55.225	52.625	24.25	55.05	53.925	45.525	3.8	54.95	56.75	56.6	50.2	54.65	53.725	52.35	15.325	52.775	52.9	46.725	28.525
Line35	53.475	55.15	55.725	30.025	56.05	60.975	55.475	37.45	51.125	51.625	48.175	13.875	53.2	56.25	53.375	43.7	54.1	49.325	54.175	47.425	53	51.4	51.875	26.075
Line36	52.875	55.7	53.275	38.575	53.875	55.925	52.475	35.075	52	52.525	51.15	17	53.575	53.9	54.075	44.35	51.475	50.75	54.575	50.675	50	52.625	47	24.875
Line37	53.7	58.25	53.55	37.975	52.575	53.625	48.725	35.9	48.6	48.3	22.025	2.875	53.1	48.15	50.9	23.55	49	49.75	51.55	42.4	52.175	50.525	43.25	14.65
Line38	59.975	59.3	55.325	37.525	50.625	54.35	47.725	16.55	51.675	51.325	50.025	7.975	55.925	58.875	55.075	40.575	56.575	56.8	51.9	47.75	51.375	53.4	47.9	24.275
Line39	56.525	58.7	52.425	33.25	56.48	56	57.5	46.15	51.1	49.675	30.325	7.675	54.225	53.8	52.075	45.35	51.75	52.025	52.725	52.525	51.925	47.725	41.475	10.725
Line40	54.65	56.125	52.125	12.35	54.925	52.8	49.175	9.475	49.875	49.025	46.325	3.225	53.475	54.1	52.825	29.9	51.575	52.025	50.9	39.8	49.525	48.725	41.175	5.125
Line41	58.625	54.75	52.9	39.2	52.55	52.8	52.625	11.05	51.875	53.4	47.9	12.7	52.7	57	54.9	49.7	61.025	57.725	54.125	41.85	51.75	51.575	47.1	23.975
Line42	55.6	57.225	56.625	46.025	53	60.05	54.675	30.55	53.4	54.975	47.85	0.725	54.075	57.975	55.525	49.25	53.25	54.525	52.575	48.275	50.775	52.375	41.8	36.6
Line43	54.375	58.85	56.85	25.4	54.475	51.575	50.925	25.425	52.05	54.45	44.25	10.85	54.65	59.625	53.35	45.825	57.925	61.15	53.35	50.975	49.35	55.175	46.35	10.125
Line44	51.875	57.475	50	38.8	53.75	55.55	51.5	25.05	52.5	53.475	45.825	5	55.075	52.925	54.8	46.675	57.85	53.55	52.925	39.925	49.275	49.625	41.65	9.15
Line45	49.225	54.825	52.325	42.65	52.975	57.975	54.95	36.375	52.775	53.475	49.4	8.6	48.3	54.225	49.375	46.9	53.2	48.775	50.15	46.45	50.3	50.675	47.475	36.075
Line46	52.9	54.05	55.55	39.5	50.7	54.375	55.3	33.5	52.15	54.475	48.225	17.575	49.4	53.8	51.2	43.075	53.45	52.825	53.55	54	51.2	53.85	49.825	29.275
Line47	55.675	55.725	54.15	35	55.625	55.25	53.9	30.225	50.625	52.875	46.975	7.725	48.8	52.25	50.575	21.525	53.7	52.1	54.675	49.825	52.725	51.625	44.775	10.225
Line48	54.075	54.675	55.775	35.275	53.8	53.3	52.75	27.025	51.2	52.625	48.3	15.4	51.575	52.475	53.15	42.025	51.45	49.425	50.35	36.025	49.7	49.5	47.675	28.025
Line49	59.225	57.875	58.75	35.575	49.325	54.55	49.8	29.575	52.575	53.625	37.675	1.75	51.95	53.9	51.275	17.05	57.825	53.625	51.15	13.175	53.075	50.225	40.875	10.85
Line50	51.325	48.775	50.725	33.025	57.35	57.8	51.875	27	51.425	45.1	43.475	2.025	48.9	37.525	50.4	37.2	44.7	42.675	36.35	16.95	49.9	37.95	44.6	9.275
Line51	54.675	54.875	53.875	12.825	56.025	56.3	38.725	19.75	51.975	51.975	43.975	2.7	50.55	51.475	50.575	46.35	56.525	52.9	52.025	42.95	51.42	49.45	45.9	16.675
Line52	58.8	55.85	60.025	40.95	55.4	52.25	51.5	8.2	54.95	53.675	49.6	12.1	56.825	57.275	53.7	47.475	56.225	55.325	55.55	49.175	52.125	56.2	51.75	24.35
Line53	57.125	56.925	57.775	35.375	57.56	59.15	60.375	43.725	49.7	53.95	46.875	8	55.525	56.85	51.925	43.425	52.975	54.525	55.775	51.5	50.25	51.575	47.85	19.925
Line54	52.525	56.625	54.225	36.175	54.55	55.5	52.55	43.925	49.6	52.05	28.875	1.275	56.4	53.7	47.875	23.725	57.975	52.85	51.375	42.1	55.25	53.375	43.05	4.75
Line55	54.35	54.4	53.025	9.55	54.85	58.525	51.975	17.625	51.4	49.375	36.75	2.6	50.475	52.625	50.125	46.775	52.95	55.225	50.725	26.975	51.325	50.25	46.025	9.625
Line56	58.975	59.6	56.75	33.5	53.3	53.275	48.025	16.05	54.625	56.45	36.2	5.05	57.3	56.175	50.8	26.35	58.225	59.825	53.6	15.325	56.425	56.45	50.25	4.725
Line57	56.925	61.7	56.425	14.825	56.175	57.75	54.075	8.775	53.875	54.55	44.65	4.4	53.775	54.65	51.025	8.825	55.475	50.525	36.3	20.8	55.325	52.9	33.65	5.575
Line58	59.775	56.9	56.35	29.4	55.825	53.975	36.525	22.65	56.25	53.025	34	4.2	54.025	54.375	53.275	42.5	56.975	53.075	54.7	38.825	52.975	52.525	47.525	2.5
Line59	51.975	54.875	56.325	26.325	57.525	57.35	55.85	29.475	53.375	53.825	35.175	3.775	53.75	53.15	49.15	23.4	58.6	54.025	35.7	36.275	51.275	53.325	43.6	22.575
Line60	54.05	54.65	52.025	20.475	54.925	52.6	38.8	16.925	51.325	49.8	34.675	2.05	48.525	50.875	48.825	41.325	53.85	51.55	52.875	42.775	51.375	50.025	47.075	17.85
Line61	57.975	57.075	56.8	44.075	59.15	56.15	52.725	13.925	54.45	56.125	47.175	3.175	56.075	56.375	53.675	40.3	53.9	52.8	55.25	46.725	55.4	56.175	53.025	49.075
Line62	57.45	59.025	59.05	40.525	56.45	56.8	52.275	13.35	53.525	51.75	49.3	2.15	54.025	57.25	58.175	47.625	58.625	55.825	54.1	40.025	52.875	58.025	54.7	33.8
Line63	55.25	54.975	49.525	38.7	57.1	55.65	42.425	12.15	52.275	50.15	46.45	12.4	52.25	56.55	54	17.55	55.475	54.575	52.125	36.275	52.225	55.675	48.3	29.775
Line64	51.3	54.675	52.05	17.15	52.975	53.825	44.95	13.8	53.625	51.825	41.7	7.075	51.125	53.075	51.475	34.1	54.1	55.475	53.25	46.1	50.75	51.25	50.5	26.05
Line65	56.625	55.175	51.05	14.375	57.8	53.45	47.15	16.625	51.875	53.075	47.825	12.675	48.325	52.35	48.475	33.775	51.875	50.925	51.95	14.9	52.125	48.25	44.5	15.775
Line66	48.55	52.775	49.85	36.5	51.95	57.6	49.95	35.2	50.925	51.725	36.025	2.075	48.725	52.125	46.625	43.3	51	47.825	51.575	25.4	47.325	47.225	40.4	10.25
Line67	54.325	54.975	54.35	42.975	55.95	58.9	56.625	28.975	53.425	52.8	49.4	12.1	52.55	55.85	51.9	40.85	56.4	57.375	55.725	49.175	54.525	50.075	49.15	29.275
Line68	55.4	59.75	51.975	15.55	57	54.175	37.05	10.25	54.4	50.9	41	5.9	51.7	51.675	50.575	13.4	54.775	55.725	51.8	12.975	53.625	45.5	22.825	3.475
Line69	54.475	57.7	52.15	25.125	56.725	53.95	51.6	23.65	52.825	56.225	47.475	18.375	51	55.1	49.55	17.225	51.175	52.45	53.45	28.675	52.525	50.325	42.575	6.8
Line70	54.3	56.125	46.15	14.65	60.7	58.675	51.425	3.1	54.1	52.85	34.425	3.175	56.4	53.375	47.575	8.5	59.325	57.275	53.4	16.725	56.775	51.85	44.5	5.75
Line71	54.425	57.25	54.175	31	57.825	58.2	54.2	26.95	54.1	51.875	45.175	6.125	48.1	52.9	48.725	7.225	53.65	54.65	53.4	37.575	54.175	52.225	47.975	6.325
Line72	53.825	52.275	52.95	38.7	54.875	58.925	54.775	45.25	51.875	51.025	37.6	6.375	49.55	51.725	50.325	44.2	53.475	50.2	50	28.025	51.8	51.25	50.5	38.625
Line73	52.35	56.35	54.425	37.025	53.85	53.55	50.35	18.125	52.425	52.5	47	8.825	51.45	52.125	51.2	28.45	50.675	53.775	52.35	41.625	52.25	51.775	45.725	11.175
Line74	54.325	56.85	55.325	42.95	53.4	54.525	54.125	35.875	50.175	49.525	44.35	13.525	49.575	51.575	52.475	43.95	48.725	53.1	50.325	46.25	53.95	50.675	50.1	38
Line75	54.15	59.25	55.775	34.125	56.4	53.575	52.275	25.275	51.325	52.025	31.525	4.4	51.025	48.6	45.125	19.925	54.85	36.15	51.875	25.575	49.85	53.95	49.375	20.45
Line76	54.9	58.125	52.35	6.675	52.625	54.025	50.55	11.225	49.8	49.85	36.5	5.875	50.675	50.625	51.15	23.575	51.525	50.075	53.075	48.25	50.075	49.3	41	13.55
Line77	55.55	58.6	55.45	38.7	59.225	52.8	43.65	43.025	56.275	53.4	43.6	12.65	51.65	53.075	55.875	50.5	52.575	52.725	53.675	38.8	50.45	51.525	52.425	37.275
Line78	52.675	55.55	51.625	16.15	56.8	50.1	45.9	5.65	52.95	51.55	45.125	3.075	51.8	55.475	52.675	20.525	52.475	51.7	47.725	18.825	51.95	50.025	42.9	11.9
Line79	55.32	57.05	57.65	38.7	56.375	54.6	49.725	13.825	52.25	52.4	45.175	3.5	50.625	51.85	52.375	28.525	55.1	54.975	52.725	42.3	51.15	50.275	45.1	18.35
Line80	54.425	58.425	55.175	38.15	57.425	55.825	52.025	27.375	52.575	53	38.8	2.5	53.25	54.225	51.975	28.75	57.975	53.425	53.15	41.625	53.325	52.5	48.8	17.625
Line81	55.05	54.05	51.9	14.95	54.65	55.825	52.025	11.8	49.5	43.025	35.3	3.4	50.75	49.25	45.275	17.275	53.725	54.45	48.975	20.45	48.05	46.15	43	15.7
Line82	54.425	57.15	55.55	18.95	59	56.7	56.825	10.3	54.98	53.375	41.8	15.125	54.925	56.4	58.025	38.05	55.825	56.075	53.85	19.85	48.675	50.7	43.4	12.25
Line83	52.675	54.825	54.125	24.775	57.85	55.275	55.35	19.025	51.15	50.1	44.2	4.475	50.95	51.225	51.75	32.2	57.575	54.075	50.85	37.025	50.875	52.6	45.9	24.575
Line84	53.275	57.025	52.7	14.025	53.45	53.375	42.925	11.35	48.575	49.55	44.9	1.775	50.9	53.65	47.425	16.55	49.225	54.375	52.125	8.925	54.175	50.2	44.55	2.9
Line85	52.625	57.025	57.825	36.725	56.75	53.1	52.2	11.55	52.675	51.625	41.225	13.125	51.375	55	52.6	19.475	53.375	54.35	53.55	19.45	53.35	55.15	51.525	22.75
Line86	54.125	53.65	54.175	40.925	55.9	53.425	47	14.4	49.525	49.2	40.05	4.575	50.55	52.925	52.625	17.9	54.55	58.375	52.075	29.425	49.175	51.025	47.875	20.85
Line87	55.825	58.675	52.55	9.85	57.65	57.45	48.375	12.3	52.775	50.6	45.425	2.45	51.025	54.875	49.6	19.675	53.1	54.15	53.525	41.825	54.325	55.175	41.675	4.075
Line88	53.1	58.8	50.425	33.85	57.675	58.175	57.15	8.625	52.1	51.3	39.725	5.7	49.425	50.75	48.7	18.375	55.9	50.5	53.275	26.375	51.425	48	22.65	1.775
Line89	58.225	60.975	57.925	22.45	58.6	59.225	56.95	34.275	53.025	52.85	45.475	15.65	57.575	56.275	53.55	35.025	55.35	57.125	52.075	12.225	54.5	49.95	48.55	12.625
Line90	56.225	56	55.3	48.35	54.5	57.95	51.225	10.225	52.075	54.7	43.3	22.175	51.95	54.7	56.25	49.475	53.375	53.85	50.75	14.95	54.025	48.75	48.15	14.625
Line91	56.325	55.725	56.05	26.25	59.65	56	54.2	10.575	51.625	52	46.225	18.95	52.325	51.325	52.775	46.45	50.225	53.35	49.125	29.3	54.35	51.425	47.525	21.675
Line92	52.675	54.05	48.875	14.875	50.65	55.975	48.775	37.025	50.775	47.375	48.95	2	50.875	52.025	53.325	34.025	55.35	52.575	53.225	48.875	49.975	49.975	48.075	15.225
Line93	56.525	54.8	53.825	19.225	54.35	54.475	50.775	7.725	57.4	51.9	46.275	2.35	50.25	54.8	50.725	31.65	53.075	52.975	56.05	37.775	51.45	49.025	46.4	15.825
Line94	55.8	58.675	57.5	29.025	56.775	58.75	54.475	28.775	57.525	55.6	38.075	2.625	56.2	56.675	55.15	46.8	60.325	56.05	54.45	42.475	53.3	54.75	50.95	25.825
Line95	56.95	55.125	55.075	13.85	57.1	56.525	52.45	19.275	51.7	51.3	36.325	5.525	52.725	52.575	48.35	44.975	55.475	51.375	53.65	35.95	53.175	50.8	44.825	15.75
Line96	55.55	56.65	59.15	48.575	59.1	57.1	55.2	36.825	56.4	53.725	38.7	4.875	55.65	57.1	52.975	51.55	58.125	55.375	56.825	23.075	57.425	56.725	46.15	39.075
Line97	55.625	57.175	57.75	46	57.975	57.2	55.6	33.675	54.925	51.675	14.175	4.3	54.975	58.7	53.325	50.45	58.25	56.3	50.9	49.275	52.825	48.175	49.85	22.3
Line98	57.575	57.45	54.45	26.725	57.275	53.075	55	17.025	50.2	51.55	48.175	5.225	57.525	62.225	57.125	45.25	54.85	56.2	48.55	36.825	54.075	53.875	51.575	14
Line99	60.275	57.625	54.675	42.3	56.4	54.15	47.425	14	54.175	53.975	47.8	8.35	54.725	55.475	58.025	49.525	54.675	55	52.625	14.55	55.7	52.6	51.7	6.25
Line100	55.475	57.625	52.975	16.575	56.35	53.3	52.125	35.475	53.7	51.3	40.4	2.225	54.2	57.075	51.525	40.275	53.975	55.5	50.775	46.05	52.725	48.975	39.725	2.225
Line101	56.7	61.35	53.85	22.05	58.25	57.025	50.025	22.05	54.575	54.5	52.05	19.825	53.95	59.625	53.575	51.625	53.925	54.45	52.95	39.875	55.5	51.35	49.3	22.225
Line102	57.325	61.25	53.95	24.85	55.55	56.1	51	11.75	53.175	50.025	48.125	17.625	54	52.775	55.45	40.225	53.775	52.7	52.6	45.75	53.4	52.2	52.475	14.025
Line103	53.55	56.575	54.925	30	54.3	55.8	53.025	27.6	52.375	54.275	49.75	23.575	50.2	49.925	53.3	44.625	52.325	54.35	52.825	43.55	50.7	45.2	50.275	12.175
Line104	58.05	58.275	57.875	51.475	57.125	56.875	53.125	43.05	56.125	53.125	43.25	14.9	56.7	52.375	52.9	45.225	52.7	55.05	53.525	49.45	51.575	49.425	49.9	24.9
Line105	55.55	57.425	57.575	47.05	53.6	55.875	51.675	16.775	55	54.175	48.5	8.075	53.625	59.425	54.175	49.975	56.6	58.375	58.075	43.9	52.775	51.825	48.3	15.9
Line106	56.6	58.375	58.8	38.775	55.3	55.15	53.85	13.175	53.175	51.375	45.1	3.975	51.55	53.95	52.725	28.325	*	*	*	*	53.525	54.8	47.45	25.55
Line107	55.725	56.65	55.55	34.45	55.75	53.65	52.95	11.6	52.7	52.525	45.4	8.35	51.55	54.05	52.75	47.325	52.95	53.725	54.525	30.825	52.325	51.3	46.475	16
Line108	57.3	56.325	53.275	23.65	52.15	59.825	49.175	19.775	51.2	50.25	51.3	16.45	52.6	53.725	51.475	43.775	50.55	57.55	53.325	37.125	54.6	53.225	52	32.125
Line109	56.85	53.45	48.35	16.825	55.05	53.95	53.675	22.65	53.15	52.875	49.475	18.55	53.825	53.625	49.625	28.125	51.425	52.7	53.675	49.8	53.45	50.8	48.025	27.85
Line110	59.65	56.8	51.525	1.975	58.425	57.6	37.025	10.2	55.475	58.475	49.1	2.325	55.125	54.45	52.35	12.9	57.05	58.425	54.85	7.075	56.875	54.7	43.075	2.475
Line111	55.625	58.4	54	24.05	54.8	55.075	53.7	37.525	54.25	56.1	49.925	14.4	50.8	57.75	54.325	23.5	57.35	53.425	50.55	39.925	55.05	52.875	47.075	13.825
Line112	57.65	57.85	56.575	51.3	57.225	62.8	56.65	33.9	54.55	58.825	54.775	22.325	50.575	54.3	53.075	36.35	64.125	59.95	57.7	50	58.375	51.475	54.425	13.6
Line113	53.8	57.225	48.25	19.9	49.45	60.75	55.45	14.95	52.25	50.575	44.7	8.675	53.05	55.7	50.475	34.55	59.15	56.3	56	42.525	50.75	56.275	49.875	2.775
Line114	57.225	56.325	51.475	43.75	52.3	55.875	52.4	46.15	53.175	53.75	52.3	31.3	52.225	57.15	53.6	33.425	48.875	53.3	54	46.525	52.975	52.925	51.275	13.2
Line115	59.25	56.775	55.2	16	59.3	57.125	45.05	9.325	52.7	55.325	52.725	21.9	54.325	57.05	55.45	25.225	57.95	56.675	55.85	42.15	53.85	51.25	47.625	17.25
Line116	57.55	56.625	43	6.15	58.125	57.375	54.65	12.15	56.525	55.05	52.225	6.225	56.54	53.95	56.85	17.675	58.525	57.225	52.2	43.075	52.2	51.425	47.025	17.4
Line117	57.225	59.575	53.225	12.825	58.3	57.875	56.525	21.65	53.7	52.9	46.6	16.9	48.85	57.075	54.7	45.85	58.975	54.95	54.225	18.275	53.175	53.125	44.7	9.525
Line118	55.625	55.15	51.175	21	57.925	55.925	50.3	13.2	53.85	53.9	15.45	0.975	48.4	53.025	51.625	28.45	53.55	54.2	48.65	37.975	51.9	50.825	45.5	15.075
Line119	61	58.075	55.375	6.775	56.525	55.05	47.05	4.95	56.1	57.275	18.225	2.8	59.35	55.5	54.05	42.6	56.725	59.075	54.375	25.175	55.4	53.825	45.975	6.85
Line120	59.9	58.475	57.3	36.625	55.025	56.6	47.05	3.175	54.7	53.025	53.95	26.775	52.725	58.9	49.5	34.125	56.175	55.775	56.3	44.85	52.425	54.875	40.6	1.95
Line121	57.05	58.975	55.475	40.9	60.1	57.025	54.575	12.45	57.45	60.025	46.6	2.575	53.175	55.475	46.675	43.8	59.975	56.8	57.975	49.3	53.775	54.375	42.525	10.175
Line122	55.85	59.55	57.125	35.825	53.975	58.125	55.55	45.675	52.9	51.65	51.175	12.05	54.625	57.975	51.425	36.2	55.825	56.7	58.35	52.05	51.6	52.275	42.9	5.1
Line123	62.175	62.95	59.025	37.125	62.125	61.9	58.1	41.875	60.4	59.65	51.475	6.05	59.45	55.475	51.3	8.1	59	59.525	55.725	43.075	59.425	60.375	56.175	12.075
Line124	58.075	60.45	57.25	32.1	61.625	59.7	50	5.2	50.8	53.525	49.675	8.125	51.8	52.525	55.35	42.55	57.775	54.9	51.325	40.85	55.1	57.625	42.775	4.775
Line125	56.95	58.675	59.65	34.7	58.5	59.45	56.125	16.975	54.05	55.575	52.05	18.025	53.8	55.9	53.725	46.825	57.975	59.575	58.2	51.4	57.8	56.55	50.55	12.075
Line126	56.05	51.075	50.85	24.375	54.475	54.775	45.8	5.45	47.025	55.075	49.375	14.125	46.925	50.425	46.825	31.725	51.075	48.75	47.625	24.825	50.225	50.75	46.025	20.65
Line127	53.15	57.075	54.15	29.225	56.05	50.675	33.7	18.2	51.85	52.625	51.675	8.775	54.25	57.4	48.25	43.7	51.1	54.35	52.475	47.45	54.225	55.15	47.175	9.8
Line128	56.225	60.975	60.475	23.8	57.775	58.5	48.4	3.925	53.325	53.075	50.4	5.65	49.775	50.025	48.625	21.175	57.375	55.7	54.625	20.475	51.875	51.7	46	7.35
Line129	56	55.05	54.45	28.525	59.1	57.5	53.3	6.8	51.375	54.6	45.025	20.375	49.35	49.65	43.7	19.025	52.925	51.475	51.5	27.2	51.225	49.775	47.375	8.875
Line130	56.15	57.275	56.125	33.4	61.25	57.525	54.875	12.95	58.425	55.7	54.35	1.375	51.675	56.175	49.4	21.225	58.325	59.225	53.95	37.225	57.1	50.225	54.65	25.45
Line131	55.95	59.95	56.15	16.5	58.025	57.025	49.825	11.95	55.3	52.175	18.4	3.175	53.4	51.825	50.35	22.275	57.975	54.575	53.525	14.3	50.35	47.1	25.2	2.475
Line132	58.6	55.925	54.9	15.375	61.25	57.675	49.7	13.25	52.75	53.9	34.35	2.575	53.15	52.175	51.075	26	56.75	52.875	53.725	27.8	51.7	51.2	25.3	1.1
Line133	55.4	61.25	55.675	20.45	58.025	57.475	50.025	6.675	56.7	55.4	33.125	2.675	53.075	54.325	51.975	35.225	54.025	56.25	57.675	36.075	55.925	52.5	32.05	2.125
Line134	57.85	59.375	56.225	39.925	58.25	56.175	46.75	7.875	54.325	59.475	52.9	3	57.85	55.8	54	43.425	52.6	59.3	54.375	31.875	53.65	50.7	46.65	14.25
Line135	56.725	56.025	52.125	24.675	61.05	57.9	54.4	8.85	53.55	53.8	50.95	2.6	53.2	52.925	51.175	26.625	58.675	57.525	56.65	36.75	53.275	48.55	34.075	8.725
Line136	57.3	58.675	49.6	9.375	60	57.75	56.025	12.225	53.7	55.225	44.7	1.375	54.425	53.4	48.25	20.175	57.25	57.325	50.425	21.375	50.35	50.6	26.575	2.8
Line137	60.3	57.2	35.95	5.55	59	55.15	51.85	10.9	58.8	57.925	9.725	4.675	52.725	52.95	51.875	25.325	56.875	58.05	54.075	16.05	56.125	51.575	33.075	6.075
Line138	62.1	62.025	55.7	46.025	59.95	61	57.075	46.725	56.25	57.3	55.875	24	54.525	56.4	52.75	48.4	58.35	60.375	60	59.025	56.125	52.7	42.825	15.625
Line139	58.8	58.25	55.225	17.6	57.2	55.975	51.275	15.85	59.375	56.525	19.375	4.4	52.55	53.1	52.725	48.95	56.85	57.225	55.85	23.625	54.225	47.8	41.425	12.775
Line140	57.3	60.75	56.275	49.45	58.85	58.75	59.3	51.925	56.125	51.35	54.175	26.075	56.475	55.775	53.725	48.725	54.825	55.95	58.775	54.025	55.175	54.85	52.3	17
Line141	58.35	62.025	54.9	11.3	59.1	57	55.825	13.725	56.75	57.85	54.85	5.025	53.45	56.425	54.325	47.95	58.975	58.5	53.8	14.05	56.4	53.5	55.575	37.75
Line142	54.925	63.725	53.525	35.85	57.825	56.4	53.325	9.575	57.075	55.525	52.475	7.2	52.6	51.825	49.675	25.95	55.05	56.925	55.725	8.425	54.925	54.1	49.525	17.5
Line143	57.2	57.625	51.7	25.4	56.9	54.375	53.125	7.475	57.75	56.875	43.6	7	53.525	55.675	52.575	45.225	54.425	54.625	49.4	14.275	52.075	53.425	48.05	18.05
Line144	56.65	55.8	47.9	15	54	56.25	49.65	10.65	54.175	54.65	48.925	5.05	55.9	53.675	49.925	33.825	57.425	54.2	49.5	11.025	51.25	53.325	35.575	17.65
Line145	58.825	60.475	54.325	23.275	59.775	55.55	52.75	10.925	56.65	59.025	55.15	16.175	55.55	51.975	50.925	38.875	58.25	52.875	55	15.275	57.25	54.25	25.7	3.125
Line146	54.25	57.65	50.225	15.525	62.125	57.2	52.175	13.8	55.6	55.85	35.875	2.575	56	52.7	51.05	40.275	56.1	55.525	52.6	14.525	54.225	50.65	45.65	2.425
Line147	58.825	61.825	53.425	15.2	61.225	58.225	53.125	12.225	57.85	54.125	36.15	4.825	59.125	56.425	44.275	13.925	60.875	59.9	57.85	25.75	54.375	52.45	45.625	3.85
Line148	61.625	62.05	55.925	14.7	60.775	58.7	55.5	14.675	57.8	57.8	45.8	3.325	58.15	56.2	56.45	51	58.9	59.575	55.475	53.025	54.625	57.075	48.6	22.475
Line149	57.65	59.425	52.075	37.6	57.05	58.95	44.625	17.75	52.325	54.575	50.05	2.85	56.325	55.075	54.975	26.225	57.05	56.95	56.075	27.3	57.45	53.825	47.9	4.425
Line150	57.8	59.85	55.2	46.625	58.175	54.4	44.575	5.075	56.525	59.8	51.55	15.6	53.775	53.725	51.45	49.625	56.675	57.075	54.125	32.75	55.675	55.075	52.7	20.425
Line151	56.475	50.525	38.025	2.875	58.2	57.3	41.2	6.7	58.425	47.1	15.425	2.325	54.425	50.8	47.925	5.175	54.225	57.675	52	29.3	53.225	47.375	20.35	1.925
Line152	56.925	55.05	49.25	5.15	56.9	55.95	44.625	5.375	51.725	49.725	14.725	2.425	52.75	53.425	51.9	22.6	59.925	54.775	50.025	17.725	52.425	49.525	25.4	0.85
Line153	58.65	57.275	53.175	39.7	59.725	52.4	51.725	4.5	52.825	52.725	48.25	1.925	53.65	54.7	52.3	35.525	54.5	55.95	49.65	35.275	53.3	54.1	50.25	15.975
Line154	51.525	55.15	51.025	26.175	55.575	51.85	49.55	5.475	52.075	50.05	29.2	2.275	53.2	49.575	47.175	17.875	55.675	54.825	50.625	21.425	53.425	48.425	43.4	5.525
Line155	58.725	61.4	60.15	48.65	59.45	57.725	51.025	32.625	55.4	55.75	46.15	25.375	54.225	52.825	53.525	45.8	57.6	54.725	55.025	47.5	53.95	52.675	55.05	26.875
Line156	59.925	60.425	57.25	51.175	60.25	57.65	59.7	38.975	54.8	58.775	50.575	20.05	54.25	54.7	51.475	35.7	58.825	56.525	54.025	48.85	54.425	55.8	51.775	32.75
Line157	63.74	59.95	58.55	48.875	61.3	61.65	56.8	30.1	61.275	58.95	54.3	16.875	57.075	58.875	54.075	48.875	58.2	58.05	53.225	12.95	60.75	58.2	49.4	6.2
Line158	61.6	61.275	47.175	6.2	60.9	59.7	55.925	22.025	58.825	53.2	34.25	2.075	52.7	57.325	54.025	51.075	57.85	56.075	50.8	22.025	57.225	53.675	40.1	3.025
Line159	64.875	62.5	54.1	53.7	62.5	56.75	53.975	5.725	59.05	58.95	51.75	7.05	53.275	53.575	58.575	42.85	60.675	57.4	53.25	5.725	60.925	55.15	50.35	16.3
Line160	59.55	61.75	56.875	20.6	61.475	58.55	55.65	10.475	57.075	57.4	54.275	26.725	55.55	56.175	56.275	40	58.875	55.9	54.475	10.475	56.125	54.725	46.65	1.675
Line161	62.825	59.675	60.4	39.275	59.7	58.575	57.25	26.075	48.475	59.725	54.4	35.375	56.7	58.1	53.55	51.9	60.8	57.375	52.35	8.1	49.94	57.55	47.3	20.075
Line162	60.575	61.825	57.125	34.825	58.65	58.7	50.775	4.125	57.8	60.85	57.1	12.375	57.15	58.45	56.25	33.075	58.75	58.15	54.1	4.125	57.925	56.275	53.475	16.3
Line163	62.65	63.25	58.525	49.375	56.575	57.25	53.8	27.8	61.025	54.2	54.425	14.025	58.725	61.85	60.875	54.525	55.875	59.975	54.475	27.8	58.96	62.25	59.6	32.6
Line164	58.475	59.875	56.775	35.675	56.175	55.05	56.525	21.525	56	56.775	47.65	2.775	59.525	56.3	51.725	49.4	57.225	57.275	59.275	21.525	58.375	59.625	39.775	2.6
Line165	58.3	57.95	49.475	7.4	57	54.4	45.325	4.625	56.2	55.925	52.25	5.425	56.625	55.975	52.775	41.8	57.375	57.475	55.675	4.625	56.5	53.325	47.75	20.425
Line166	55.85	58.3	53.4	33.175	53.275	55.075	53.425	44.4	56.2	55.55	52.5	34.4	54.125	52.875	54.075	49	56.175	51.1	54.05	49.95	54.95	51.025	47.825	15.2
Line167	58.6	55.9	53.975	42	57.25	50.3	49.1	3.025	51.625	54.45	47.125	3.85	55.725	55.9	49.025	39.425	53.85	56.4	49.1	3.025	54.15	51.075	48.65	23.6
Line168	56.725	56.025	45.9	23.35	55.8	54.525	46.6	16.9	52.8	50.725	49.85	2.45	53.35	56.5	53.95	47.925	51.525	53.9	53.175	8.9	*	*	*	*
Line169	59.6	61.75	56.65	47.225	55.375	54.075	50.6	13.325	54.35	54.375	26.075	3.025	55.575	52.35	51.025	19.75	55.325	47.625	53.5	13.325	55.8	55.625	49.825	3.3
Line170	60.475	58.675	55.325	44.35	57.925	55.5	51.4	14.45	57.45	55.6	52.275	11.675	55.825	56.575	54.3	44.575	57.7	57.35	57.35	14.45	57.125	54.375	53.05	18.675
Line171	58.725	62.45	54.7	11.125	56.975	52.8	40.4	8.9	53.75	51.15	1.625	4.325	55.5	52.575	47.15	20.075	55.025	55.95	53.55	8.9	56.6	53.625	37.075	1.95
Line172	61.1	60.575	57.45	28.875	60.8	56.95	49.25	10.15	56.25	55.475	51.075	10.55	53.4	54.65	53.4	44.25	56.6	60.725	60.425	10.15	58.875	57.875	56.9	29.35
Line173	59.325	59.075	57.05	34.175	54.35	54.425	50.45	12	54.15	53.85	50.125	10.775	52.85	52.325	53.85	52.15	56.9	56.5	51.275	12	57.15	55.925	53.925	25.35
Line174	58.925	55.5	54.7	26.275	52.25	54.65	50.575	12.1	54.675	55.1	46.65	9.175	52.3	56.775	52.875	44.475	55.625	56.925	53.925	12.1	55.4	54.575	49.9	23.025
Line175	54.4	54.55	55.55	34.975	49.95	47.2	40.1	3.5	48.375	50.85	33.825	3.025	49.475	51.225	47.175	23.3	53.225	58.225	52.95	6.95	50.95	54.9	47.125	32.275
Line176	59.85	59.175	54.2	26.425	57.025	56.675	44.175	9.725	56.275	57.45	54.45	22.575	58.1	56.875	52.05	44.45	54.175	56.1	54.875	9.725	57.2	54.175	46.525	0.6
Line177	58.775	60.15	52.9	17.525	56.2	55.55	56.4	25.15	58.825	55.175	54.575	1.975	58.625	57.75	55.775	18.2	55.025	55.65	52.9	8.15	56	54.85	41.15	5.275
Line178	61.375	57.975	50.875	10.95	55.7	56.625	48.925	6.975	58.1	51.125	26.7	4.225	56.9	57.4	55.525	48.775	58.125	53.275	52.725	6.975	54.625	54.05	53.475	21
Line179	59.75	57.9	55.65	20.15	59.35	55.525	51.3	21.25	55.775	56.85	36.05	4.525	60	54.3	56.05	54.15	53.35	55.675	55.375	8	56.4	56.65	56.475	24.225
Line180	59.3	59.575	54.95	23.55	51.45	50.975	49.925	9.3	54.375	53	21.2	3.475	56.675	56.6	54.3	32.725	54.05	54.525	53.85	9.45	52.475	52.675	54.4	14.35
Line181	60.125	57.775	54.1	10.575	57.15	55.85	52.5	11.125	52.425	50.85	10.95	4.15	57.2	56.725	55.775	18.8	53.875	55.275	55.425	11.125	57.9	54.275	43.85	6.675
Line182	61.55	61.325	62.2	15.425	57.325	56.15	46.15	13.975	53.85	57.75	47.875	3.975	58.35	58.525	56.1	27.05	56.95	56.4	59.075	13.975	60.075	57.275	55.65	17.575
Line183	59.375	59.4	58.5	33.35	56.95	58.25	48.75	11.65	55.325	54.3	30.575	4.975	55.475	52.675	55.05	54.575	55.225	56.425	53.525	11.65	58.325	54.925	46.525	10.25
Line184	56.175	54.5	55.35	31.325	53.35	53.7	45.7	9.275	51.775	51.75	45	12.7	54.025	52.475	52.45	48.325	53.875	54.9	50.95	9.275	55.1	53.15	52.6	24.15
Line185	59.225	56.6	57.05	46.3	53.025	54.4	50.5	10.475	53.925	55.525	48.925	9.575	56.95	53.65	54.6	51.075	51.7	54.975	50.675	10.475	52.625	52.2	52.475	28.275
Line186	61.45	57.625	54.85	3.925	54.3	55.225	52.025	13.225	53.275	54.325	31.3	2	55.275	54.15	52.9	18	57.425	54.375	53.425	13.325	55.1	53.375	41.35	5.175
Line187	57.275	59.275	54.45	51.65	54.925	52.425	48.075	14.325	56.025	55.9	47.15	6.1	54.975	56.1	52.15	48.725	52.4	56.025	52.05	14.325	56.9	54.35	51.85	24.075
Line188	60.55	61.375	56.925	27.3	56.625	60.275	54.625	11.875	58.15	54.95	52.5	3.9	56.925	58.35	56.325	50.025	54.375	56.35	54.475	11.875	58.725	57.05	53.65	34.5
Line189	61.3	64.8	58.275	51.85	61.825	58.225	54.8	51.875	55.25	55.625	49.5	8.6	57.075	57.225	56.15	50.35	60.425	56.45	56.725	48.575	54.75	55.475	51.125	45.225
Line190	58.725	55.75	55.025	16.5	54.75	58.175	47.2	23.625	55.8	55.625	47.875	14.2	57.225	52.15	53.3	50.55	52.175	51.7	51.975	23.625	55.375	55.25	51.675	20.625
Line191	61.25	57.725	53.475	12.25	52.725	54.05	50.225	19.425	55.575	53.9	47.625	12.375	55.525	56.1	54.15	45.925	57	56.3	50.925	19.425	57.15	55.675	52.7	47.4
Line192	54.65	58.125	53.95	35.3	51.65	50.8	45.375	42.6	51.625	54.175	49.325	19.15	51.725	51.925	51.75	45.8	52.075	53.975	54.425	54.05	52.625	51.375	48.425	20.45
Line193	58.65	59.7	56.75	9.4	58.825	61.25	49.95	11.225	53.575	54.3	49.975	15.975	55.55	54	52.9	50.775	57.925	58.65	55.325	50.35	52.3	51.725	53.775	20.45
Line194	58	59.575	56.95	49.65	59.75	50.9	53.8	44.25	57.25	52.725	46.35	5.8	58.975	55.375	57.425	47.95	57.1	55.975	49.5	8.475	53.3	54.925	50.45	38
Line195	62.425	59.5	61.425	23.955	61	55.3	45.625	10.425	59.525	56.1	52.85	7.4	60.8	59.575	60.925	50.65	61.65	57.75	57.1	10.425	59.15	56.55	55.075	23.25
Line196	59.85	59.625	54.65	21	57.75	55.975	54	42.2	51.875	49.125	29.275	1.85	49.95	56.375	56.925	49.35	57.65	54.15	56.35	7.675	56.05	54.6	52.45	24
Line197	61.225	55.075	47.2	4.9	61.3	57.475	41.125	5.4	57.325	47.425	18.45	3.975	59.225	56.1	48.275	5.275	56.5	58.45	51.375	5.4	57.925	54.325	33.275	4.475
Line198	60.55	62.9	57.975	54.45	62.6	60.25	56.625	44.65	60.475	54.2	54.05	15	56.4	59.325	53.05	48.45	61.8	59.625	57.125	43.025	53.15	56.025	54.925	33.8
Line199	58.05	61.075	57.325	37.275	57.675	51.15	35.15	2.325	53.9	52.6	25.275	4.925	56.25	54.9	48.15	13.1	57.875	57.6	54.55	2.325	54.85	51.675	46.4	10.85
Line200	52.25	53.475	45.475	12.325	52.575	51.825	50.1	34.975	54	49.225	54.075	16.15	51.225	52.025	49.825	39.8	54.25	55.15	55.725	48.45	52.075	52.075	43.225	2.925
Line201	53.375	57.75	52.625	35.725	55.2	55.025	44.8	10.05	59.35	52.725	40.1	2.425	53.075	52.875	49.55	49.7	58.675	52.875	50.925	32.525	50.6	53.65	39.35	24.3

## Sheet: Map data
Appendix B: Genotypic data and genetic map of the DH population
	1	2	3	4	5	6	7	8	9	10	11	12	13	14	15	16	17	18	19	20	21	22	23	24	25	26	27	28	29	30	31	32	33	34	35	36	37	38	39	40	41	42	43	44	45	46	47	48	49
6B_12646400	2	2	2	2	2	2	0	0	0	0	0	0	0	2	0	2	2	2	2	0	0	2	0	-1	2	0	0	0	2	2	0	2	0	0	2	2	0	2	0	-1	2	2	0	2	2	0	0	2	2
6B_7289543	2	-1	2	2	2	2	0	0	0	0	0	0	0	2	0	2	2	2	2	0	0	2	0	2	2	0	0	0	2	2	0	2	0	0	2	2	0	2	0	2	2	2	0	2	2	0	0	2	2
6B_4550936	2	-1	2	2	2	2	0	0	0	0	0	0	0	2	0	2	2	2	2	0	0	2	0	2	2	0	0	0	2	2	0	2	0	0	2	2	0	2	0	2	2	2	0	2	2	0	0	2	2
6B_4550882	2	2	2	2	2	2	0	0	0	0	0	0	0	2	0	2	2	2	2	0	0	2	0	2	2	0	0	0	2	2	0	2	0	0	2	2	0	2	0	2	2	2	0	2	2	0	0	2	2
6B_12646449	2	2	2	2	2	2	0	0	0	0	0	0	0	2	0	2	2	2	2	0	0	2	0	2	2	0	0	0	2	2	0	2	0	0	2	2	0	2	0	2	2	2	0	2	2	0	0	2	2
6B_13852126	2	2	2	2	2	2	0	0	0	0	0	0	0	2	0	2	2	2	2	0	0	2	0	2	2	0	0	2	2	2	0	2	0	0	2	2	0	2	0	2	2	2	0	2	2	0	0	2	2
6B_16964233	2	2	2	2	2	2	0	0	0	0	0	0	0	2	0	2	2	2	2	0	0	2	0	2	2	2	0	2	2	2	0	2	0	0	2	2	0	2	0	2	2	2	0	2	2	0	0	2	2
6B_14846167	2	2	2	2	2	2	0	0	0	0	0	0	0	2	0	2	2	2	2	0	0	2	0	2	2	0	0	2	2	2	0	2	0	0	2	2	0	2	0	2	2	2	0	2	2	0	0	2	2
6B_27170464	-1	0	2	-1	2	0	0	0	0	-1	0	2	0	2	0	2	0	2	2	0	0	0	0	-1	2	0	0	2	2	2	2	2	0	0	2	2	-1	2	0	-1	2	2	0	2	2	0	2	2	-1
6B_27076238	2	0	2	2	2	0	0	0	0	0	0	2	0	2	0	2	0	2	2	0	0	0	0	2	2	0	0	2	2	2	2	2	0	0	2	2	0	2	0	0	2	2	0	2	2	0	2	2	0
6B_27076199	2	0	2	2	2	0	0	0	0	0	0	2	0	2	0	2	0	2	2	0	0	0	0	2	2	2	0	2	2	2	2	2	0	0	2	2	0	2	0	0	2	2	0	2	2	0	2	2	0
6B_29048739	2	0	2	2	2	0	0	0	0	0	0	2	0	2	0	2	0	2	2	0	0	0	0	2	2	2	0	2	2	2	2	2	0	0	2	2	0	2	0	0	2	2	0	2	2	0	2	2	0
6B_28163782	2	0	2	2	2	0	0	0	0	0	0	2	0	2	0	2	0	2	2	0	0	0	0	2	2	2	0	2	2	2	2	2	0	0	2	2	0	2	0	0	2	2	0	2	2	0	2	2	0
6B_32696502	2	0	2	2	2	0	0	0	0	2	0	2	0	2	0	2	0	2	2	0	0	0	0	2	2	2	0	2	2	2	2	2	0	0	0	2	0	2	0	0	2	0	0	2	2	0	2	0	0
6B_33068670	2	0	2	2	2	0	0	0	0	2	0	2	0	2	0	2	0	2	2	0	0	0	0	2	2	2	0	2	2	2	2	2	0	0	0	2	0	2	0	0	2	0	0	2	2	0	2	0	0
6B_34919308	2	0	2	2	2	0	0	0	0	2	0	2	0	2	0	2	0	2	2	0	0	0	0	2	2	2	0	2	2	2	2	2	0	0	0	2	0	2	0	0	2	0	0	2	2	0	2	0	0
6B_40498101	2	0	2	2	2	0	0	0	0	2	0	2	0	2	0	2	0	2	2	0	0	0	0	2	2	2	0	2	2	2	2	2	0	0	0	2	0	2	2	2	2	0	-1	2	2	0	2	0	0
6B_63447875	0	0	2	2	2	0	0	0	0	2	0	2	0	2	0	2	0	0	2	0	0	0	0	0	2	2	0	2	2	2	2	2	0	0	0	2	0	2	2	2	2	0	0	2	2	2	2	0	0
6B_42744150	2	0	2	2	2	0	0	0	0	2	0	2	0	2	0	2	0	0	2	0	0	0	0	0	2	2	0	2	2	2	2	2	0	0	0	2	0	2	2	2	2	0	0	2	2	0	2	0	0
6B_46653877	0	0	2	2	2	0	0	0	0	2	0	2	0	2	0	2	0	0	2	0	0	0	0	0	2	0	0	2	2	2	2	2	0	0	0	2	0	2	2	2	2	0	0	2	2	0	2	0	0
6B_49874158	0	0	2	2	2	0	0	2	0	2	0	2	0	2	0	2	0	0	2	0	0	0	0	-1	2	0	0	2	2	2	2	2	0	-1	-1	2	0	2	2	2	2	0	0	2	2	0	2	0	0
6B_51218321	0	0	2	2	2	0	0	0	0	2	0	2	0	2	0	2	0	0	2	0	0	0	0	0	2	2	0	2	2	2	2	2	0	0	0	2	0	2	2	2	2	0	0	2	2	0	2	0	0
6B_107078695	0	0	2	2	2	0	0	0	0	2	0	2	0	2	0	2	0	0	2	0	0	0	0	0	2	2	0	2	2	2	2	2	0	0	0	2	0	2	2	2	2	0	0	2	2	2	2	0	0
6B_118821598	0	0	2	2	2	0	0	0	0	2	0	2	0	2	0	2	0	0	2	0	0	0	0	-1	2	2	0	2	2	2	2	2	0	0	0	2	0	2	2	2	2	0	0	2	2	2	2	0	0
6B_117132385	0	0	2	2	2	0	0	0	0	2	0	2	0	2	0	2	0	0	2	0	0	0	0	0	2	2	0	2	2	2	2	2	0	0	0	2	0	2	2	2	2	0	0	2	2	2	2	0	0
6B_119509581	0	0	2	2	2	0	0	0	0	2	0	2	0	2	0	2	0	0	2	0	0	0	0	0	2	2	0	2	2	2	2	2	0	0	0	2	0	2	2	2	2	0	0	2	2	2	2	0	0
6B_113647766	0	0	2	2	2	0	0	0	0	2	0	2	0	2	0	2	0	0	2	0	0	0	0	-1	2	0	0	2	2	2	2	2	0	0	0	2	0	2	2	-1	2	0	0	2	2	2	2	0	0
6B_127010003	0	0	2	2	2	0	0	0	0	2	0	2	0	2	0	2	0	0	2	0	0	0	0	0	2	2	0	2	2	2	2	2	0	0	0	2	0	2	2	2	2	0	0	2	2	0	2	0	0
6B_135936136	0	0	2	2	2	0	0	0	0	2	0	2	0	2	0	2	0	0	2	0	0	0	0	0	2	2	0	2	2	2	2	2	0	0	0	2	0	2	2	2	2	0	0	2	2	0	2	0	0
6B_126313979	0	0	2	2	2	0	0	0	0	2	0	2	0	2	0	2	0	0	2	0	0	0	0	0	2	2	0	2	2	2	2	2	0	0	0	2	0	2	2	2	2	0	0	2	2	0	2	0	0
6B_130943374	0	0	2	2	2	0	0	0	0	2	0	2	0	2	0	2	0	0	2	0	0	0	0	0	2	2	0	2	2	2	2	2	0	0	0	2	0	2	2	2	2	0	0	2	2	0	2	0	0
6B_121816495	0	0	2	2	2	0	0	0	0	2	0	2	0	2	0	2	0	0	2	0	0	0	0	-1	2	2	0	2	2	2	2	2	0	0	0	2	0	2	2	-1	2	0	0	2	2	0	2	0	0
6B_124481077	0	0	2	2	2	0	0	0	0	2	0	2	0	2	0	2	0	0	2	0	0	0	0	0	2	2	0	2	2	2	2	2	0	0	0	2	0	2	2	2	2	0	0	2	2	0	2	0	0
6B_124993548	0	0	2	2	2	0	0	0	0	2	0	2	0	2	0	2	0	0	2	0	0	0	0	-1	2	2	0	2	2	2	2	2	0	0	0	2	0	2	2	2	2	0	0	2	2	0	2	0	-1
6B_135936143	0	0	2	2	2	0	0	0	0	2	0	2	0	2	0	2	0	0	2	0	0	0	0	0	2	2	0	2	2	2	2	2	0	0	0	2	0	2	2	2	2	0	0	2	2	0	2	0	0
6B_141025618	0	0	2	2	2	0	0	0	0	2	0	2	0	2	0	2	0	0	2	0	0	0	0	0	2	2	0	2	2	2	2	2	0	0	0	2	0	2	2	2	2	0	0	2	2	0	2	0	0
6B_140403226	0	0	2	2	2	0	0	0	0	2	0	2	0	2	0	2	0	0	2	0	0	0	0	0	2	2	0	2	2	2	2	2	0	0	0	2	0	2	2	2	2	0	0	2	2	0	2	0	0
6B_149307648	0	0	2	2	2	0	0	0	0	2	0	2	0	2	0	2	0	0	2	0	0	0	0	0	2	2	0	2	2	2	2	2	0	0	0	2	0	2	2	2	2	0	0	2	2	0	2	0	0
6B_149307511	0	0	2	2	2	0	0	0	0	2	0	2	0	2	0	2	0	0	2	0	0	0	0	0	2	2	0	2	2	2	2	2	0	0	0	2	0	2	2	2	2	0	0	2	2	0	2	0	0
6B_197533403	0	0	2	2	2	0	0	0	0	2	0	2	0	2	0	2	0	0	2	0	0	0	0	-1	2	2	0	2	2	2	2	2	0	0	0	2	0	2	2	-1	2	0	0	2	2	0	2	0	0
6B_148337616	0	0	2	2	2	0	0	0	0	-1	0	2	-1	2	0	2	0	0	2	0	-1	0	0	-1	2	2	0	-1	2	2	2	2	0	-1	0	2	2	2	2	2	2	0	0	2	2	0	2	0	-1
6B_148337416	0	0	2	2	2	0	0	0	0	2	0	2	0	2	0	2	0	0	2	0	0	0	0	0	2	2	0	2	2	2	2	2	0	0	0	2	0	2	2	2	2	0	0	2	2	0	2	0	0
6B_142585170	0	0	2	2	2	0	0	0	0	2	0	2	0	2	0	2	0	0	2	0	0	0	0	0	2	2	0	2	2	2	2	2	0	0	0	2	0	2	2	2	2	0	0	2	2	0	2	0	0
6B_151046776	0	0	2	2	2	0	0	0	0	2	0	2	0	2	0	2	0	0	2	0	0	0	0	0	2	2	0	2	2	2	2	2	0	0	0	2	0	2	2	2	2	0	0	2	2	0	2	0	0
6B_158367177	0	0	2	2	2	0	0	-1	0	2	0	2	0	2	0	2	0	0	2	0	0	0	0	-1	2	2	0	2	2	2	2	2	-1	0	0	2	0	2	2	2	2	0	0	2	2	0	2	0	0
6B_177833808	0	0	2	2	2	0	0	0	0	2	0	2	0	2	0	2	0	0	2	0	0	0	0	0	2	2	0	2	2	2	2	2	0	0	0	2	0	2	2	2	2	0	0	2	2	0	2	0	0
6B_451872187	0	0	2	2	2	0	0	0	0	2	0	2	0	2	0	2	0	0	2	0	0	0	0	0	2	2	0	2	2	2	2	2	0	0	0	2	0	2	2	2	2	0	0	2	2	0	2	0	0
6B_439224246	0	0	2	2	2	0	0	0	0	2	0	2	0	2	0	2	0	0	2	0	0	0	0	0	2	2	0	2	2	2	2	2	0	0	0	2	0	2	2	2	2	0	0	2	2	0	2	0	0
6B_257327779	0	0	2	2	2	0	0	0	0	2	0	2	0	2	0	2	0	0	2	0	0	0	0	0	2	2	0	2	2	2	2	2	0	0	0	2	0	2	2	2	2	0	0	2	2	0	2	0	0
6B_240080425	0	0	2	2	2	0	0	0	0	2	0	2	0	2	0	2	0	0	2	0	0	0	0	0	2	2	0	2	2	2	2	2	0	0	0	2	0	2	2	2	2	0	0	2	2	0	2	0	0
6B_278137184	0	-1	2	2	2	0	0	-1	0	-1	0	2	0	2	0	2	0	0	2	0	0	0	0	-1	2	2	0	2	2	2	2	2	0	0	0	2	-1	2	2	2	2	0	0	2	2	0	2	0	0
6B_209112861	0	-1	-1	-1	2	0	0	0	0	-1	0	2	-1	-1	0	2	0	0	2	0	0	0	0	-1	2	2	0	2	2	2	2	2	0	0	0	-1	0	2	2	-1	-1	0	0	-1	-1	0	2	0	-1
6B_237108660	0	0	2	2	2	0	0	0	0	2	0	2	0	2	0	2	0	0	2	0	0	0	0	0	2	2	0	2	2	2	2	2	0	0	0	2	0	2	2	2	2	0	0	2	2	0	2	0	0
6B_237108561	0	0	2	2	2	0	0	0	0	0	0	2	0	2	0	2	0	0	2	0	0	0	0	0	2	2	0	2	2	2	2	2	0	0	0	2	0	2	2	2	2	0	0	2	2	0	2	0	0
6B_189526543	0	0	2	2	2	0	0	0	0	2	0	2	0	2	0	2	0	0	2	0	0	0	0	0	2	2	0	2	2	2	2	2	0	0	0	2	0	2	2	2	2	0	0	2	2	0	2	0	0
6B_158367261	-1	-1	2	2	2	0	0	-1	0	2	0	2	0	2	0	2	0	0	2	0	0	0	0	-1	2	2	0	2	2	2	2	2	0	0	0	2	0	2	2	2	2	0	0	2	2	0	2	0	-1
6B_262401440	0	0	2	2	2	0	0	0	0	2	0	2	0	2	0	2	0	0	2	0	0	0	0	0	2	2	0	2	2	2	2	2	0	0	0	2	0	2	2	2	2	0	0	2	2	0	2	0	0
6B_458602689	0	0	2	2	2	0	0	0	0	2	0	2	0	2	0	2	0	0	2	0	0	0	0	0	2	2	0	2	2	2	2	2	0	0	0	2	0	2	2	2	2	0	0	2	2	0	2	0	0
6B_470807097	0	0	2	2	2	0	0	0	0	2	0	2	0	2	0	2	0	0	2	0	0	0	0	0	2	2	0	2	2	2	2	2	0	0	0	2	0	2	2	-1	2	0	0	2	2	0	2	0	0
6B_470807066	0	0	2	2	2	0	0	0	0	2	0	2	0	2	0	2	0	0	2	0	0	0	0	0	2	2	0	2	2	2	2	2	0	0	0	2	0	2	2	2	2	0	0	2	2	0	2	0	0
6B_470806770	0	0	2	2	2	0	0	0	0	-1	0	2	0	2	0	2	0	0	2	0	0	0	0	-1	2	2	0	2	2	2	2	2	0	0	0	2	0	2	2	2	2	0	0	2	2	0	2	0	-1
6B_474153185	0	0	2	2	2	0	0	0	0	2	0	2	0	2	0	2	0	0	2	0	0	0	0	0	2	2	0	2	2	2	2	2	0	0	0	2	0	2	2	2	2	0	0	2	2	0	2	0	0
6B_515779733	0	0	2	2	2	0	0	0	0	2	0	2	0	2	0	2	0	0	2	0	0	0	0	0	2	2	0	2	2	2	2	2	0	-1	0	2	0	2	2	2	2	0	0	2	2	0	2	0	0
6B_509297036	0	0	2	2	2	0	0	0	0	2	0	2	0	2	0	2	0	0	2	0	0	0	0	0	2	2	0	2	2	2	2	2	0	0	0	2	0	2	2	2	2	0	0	2	2	0	2	0	0
6B_521185284	0	0	2	2	2	0	0	0	0	2	0	2	0	2	0	0	0	0	2	0	0	0	0	0	2	2	0	2	2	2	2	2	0	0	0	2	0	2	2	2	2	0	0	2	2	0	2	0	0
6B_553401216	0	0	2	2	2	0	0	0	0	2	0	2	0	2	0	0	0	0	2	0	0	0	0	0	2	2	0	2	2	2	2	2	0	0	0	2	0	2	2	2	2	0	0	2	2	0	2	0	0
6B_532050523	0	0	2	2	2	0	0	0	0	2	0	2	0	2	0	0	0	0	2	0	0	0	0	0	2	2	0	2	2	2	2	2	0	0	0	2	0	2	2	2	2	0	0	2	2	0	2	0	0
6B_482112866	0	0	2	2	2	0	0	0	0	2	0	2	0	2	0	0	0	0	2	0	0	0	0	0	2	2	0	2	2	2	2	2	0	0	0	2	0	2	2	2	2	0	0	2	2	0	2	0	0
6B_502090933	0	0	2	2	2	0	0	0	0	2	0	2	0	2	0	0	0	0	2	0	0	0	0	0	2	2	0	2	2	2	2	2	0	0	0	2	0	2	2	2	2	0	0	2	2	0	2	0	0
6B_528906003	0	0	2	2	2	0	0	0	0	2	0	2	0	2	0	0	0	0	2	0	0	0	0	0	2	2	0	2	2	2	2	2	0	0	0	2	0	2	2	2	2	0	0	2	2	0	2	0	0
6B_549190405	0	0	2	2	2	0	0	0	0	2	0	2	0	2	0	0	0	0	2	0	0	0	0	0	2	2	0	2	2	2	2	2	0	0	0	2	0	2	2	2	2	0	0	2	2	0	2	0	0
6B_555877548	0	0	2	2	2	0	0	0	0	2	0	2	0	2	0	0	0	0	2	0	0	0	0	0	2	2	0	2	2	2	2	2	0	0	0	2	0	2	2	2	2	0	0	2	2	0	2	0	0
6B_577255596	0	0	2	2	2	0	0	0	0	2	0	2	0	2	0	0	0	0	2	0	0	0	0	0	2	2	0	2	2	2	2	2	0	0	0	2	0	2	2	2	2	0	0	2	2	0	2	0	0
6B_561009476	0	0	2	2	2	0	0	0	0	2	0	2	0	2	0	0	0	0	2	0	0	0	0	0	2	2	0	2	2	2	2	2	0	0	0	2	0	2	2	2	2	0	0	2	2	0	2	0	0
6B_590823855	0	0	2	2	2	0	0	0	0	2	0	2	0	2	0	0	0	0	2	0	0	0	0	0	2	2	0	2	2	2	2	2	0	0	0	2	0	2	2	2	2	0	0	2	2	0	2	0	0
6B_587418649	0	0	2	2	2	0	0	0	0	2	0	2	0	2	0	0	0	0	2	0	0	0	0	0	2	2	0	2	2	2	2	2	0	0	0	2	0	2	2	2	2	0	0	2	2	0	2	0	0
6B_588566840	-1	0	2	2	2	0	0	0	0	2	0	2	0	2	0	0	0	0	2	0	0	0	0	-1	2	2	0	2	2	2	-1	2	0	0	0	2	0	2	2	-1	2	0	0	2	2	0	2	0	-1
6B_608599368	0	0	2	2	2	0	0	0	0	2	0	2	0	2	0	0	0	0	2	0	0	0	0	0	2	2	0	2	2	2	2	2	0	0	0	2	0	2	2	2	2	0	0	2	2	0	2	0	0
6B_644000472	0	0	2	2	2	0	0	0	0	2	0	2	0	2	0	0	0	0	2	0	0	0	0	0	2	2	0	2	2	2	2	2	0	0	0	2	0	2	2	2	2	0	0	2	2	0	2	0	0
6B_637367947	0	0	2	2	2	0	0	0	0	2	0	2	0	2	0	0	0	0	2	0	0	0	0	0	2	2	0	2	2	2	2	2	0	0	0	2	0	2	2	2	2	0	0	2	2	0	2	0	0
6B_625285344	0	0	2	2	2	0	0	0	0	2	0	2	0	2	0	0	0	0	2	0	0	0	0	0	2	2	0	2	2	2	2	2	0	0	0	2	0	2	2	2	2	0	0	2	2	0	2	0	0
6B_626883574	0	0	2	2	2	0	0	0	0	-1	0	2	-1	2	-1	0	0	0	2	0	0	0	0	-1	2	2	0	2	2	2	2	2	0	0	0	2	0	2	2	-1	2	0	0	2	2	0	2	0	0
6B_650794575	0	0	2	2	2	0	0	0	0	2	0	2	0	2	0	2	0	0	2	0	0	0	0	0	2	2	0	2	2	2	2	2	0	0	0	2	0	2	2	-1	2	0	0	2	2	0	2	0	0
6B_655865257	0	0	2	2	2	0	0	0	0	2	0	2	0	2	0	2	0	0	2	0	0	0	0	-1	2	2	0	2	2	2	-1	2	0	0	0	2	0	2	2	-1	2	0	0	-1	2	0	2	0	-1
6B_647153740	0	0	2	2	2	0	0	0	0	2	0	2	0	2	0	2	0	0	2	0	0	0	0	0	2	2	0	2	2	2	2	2	0	0	0	2	0	2	2	2	2	0	0	2	2	0	2	0	0
6B_659573035	0	0	2	2	2	0	0	0	0	2	0	2	0	2	0	2	0	0	2	0	0	0	0	0	2	2	0	2	2	2	2	2	0	0	0	2	0	2	2	2	2	0	0	2	2	0	2	0	0
6B_668891452	0	0	2	2	2	0	0	0	0	2	0	2	0	2	0	2	0	0	2	0	0	0	0	0	2	2	0	2	2	2	2	2	0	0	0	2	0	2	2	2	2	2	0	2	2	0	2	0	2
6B_676534940	0	0	2	2	2	0	0	0	0	2	0	2	0	2	0	2	0	0	2	0	0	0	0	0	2	2	0	2	2	2	2	2	0	0	0	2	0	2	2	2	2	2	0	2	2	0	2	0	2
6B_681412567	0	0	0	2	2	0	0	0	0	2	0	2	0	2	0	2	0	0	2	0	0	0	0	0	0	2	0	2	2	2	2	2	0	0	0	0	0	2	2	2	0	2	0	2	2	0	2	0	2
6B_681173770	0	0	0	2	2	0	0	0	0	2	0	2	0	2	0	2	0	0	2	0	0	0	0	0	0	2	0	2	2	2	2	2	0	0	0	0	0	2	2	2	0	2	0	2	2	0	2	0	2
6B_684376991	0	0	0	2	2	0	0	0	0	2	0	2	0	2	0	2	0	0	2	0	0	0	0	0	0	2	0	2	2	2	2	2	0	0	0	0	0	2	2	2	0	2	0	2	2	0	2	0	2
6B_687067128	0	2	0	2	2	0	0	0	0	2	0	2	0	2	0	2	0	0	2	0	0	0	0	0	0	2	0	2	2	2	2	2	0	0	0	0	2	2	2	2	0	2	0	2	2	0	2	0	2
6B_687067040	0	2	0	2	2	0	0	0	0	2	0	2	0	2	0	2	0	0	2	0	0	0	0	0	0	2	0	2	2	2	2	2	0	0	0	0	2	2	2	2	0	2	0	2	2	0	2	0	2
6B_692736604	0	2	0	2	2	0	2	0	0	2	0	2	0	2	0	2	0	0	2	0	0	0	0	0	0	2	0	2	2	2	2	0	0	0	0	0	2	2	0	2	0	2	0	2	2	0	2	0	2
6B_696412686	2	2	0	0	2	0	2	0	0	2	0	2	0	2	0	0	0	0	2	0	0	0	0	0	0	2	0	2	2	2	2	2	0	0	0	0	2	2	0	0	0	2	0	0	2	0	2	0	2
6B_705314997	2	2	0	0	2	2	2	0	0	2	2	2	2	2	0	0	0	0	2	0	0	2	0	0	0	2	0	0	2	0	2	2	2	0	0	0	2	2	2	0	0	2	0	0	2	2	2	0	2
6B_704893651	2	2	0	0	2	2	2	0	0	2	2	2	2	2	0	0	0	0	2	0	0	2	0	0	0	2	0	0	2	0	2	2	2	0	0	0	2	2	2	0	0	2	-1	0	2	2	2	0	2
6B_712323218	2	2	0	0	2	2	2	0	0	2	2	0	2	2	0	0	0	2	2	0	0	2	2	0	0	2	0	0	2	0	2	2	2	0	0	0	2	2	2	0	0	2	0	0	2	2	2	0	2
6B_712323166	2	2	0	0	2	2	2	0	0	2	2	0	2	2	0	0	0	2	2	0	0	2	2	0	0	2	0	0	2	0	2	2	2	0	0	0	2	2	2	0	0	2	0	0	2	2	2	0	2
6B_718642454	2	2	0	0	2	2	2	0	0	2	2	0	2	2	0	0	0	2	2	0	0	2	2	0	0	2	0	0	2	0	2	2	2	0	0	0	2	2	2	0	0	2	0	0	2	2	2	2	2
3B_793902398	0	2	0	2	0	0	0	0	2	0	2	0	0	2	0	2	2	2	2	0	0	0	2	0	2	0	2	0	2	0	2	2	0	0	0	2	2	0	2	2	2	2	2	2	0	2	2	0	0
3B_785703323	0	2	0	2	0	0	0	0	2	0	2	2	0	2	0	2	2	2	2	0	2	0	2	0	0	0	2	0	2	0	2	2	0	0	0	2	2	0	2	2	2	2	2	2	0	2	2	0	0
3B_787809760	0	2	0	2	0	0	0	0	2	0	2	2	0	2	0	2	2	2	2	0	2	0	2	0	0	0	2	0	2	0	2	2	0	0	0	2	2	0	2	2	2	2	2	2	0	2	2	0	0
3B_784079362	0	2	0	2	-1	0	0	0	2	0	2	2	0	2	0	2	2	2	2	0	2	0	2	-1	0	0	2	0	2	0	2	2	0	0	0	2	0	0	2	2	2	2	2	2	0	2	2	0	-1
3B_774883534	0	2	0	2	2	0	0	0	2	0	0	0	0	2	0	2	2	2	2	0	2	2	2	0	2	0	2	0	2	0	0	2	0	0	0	2	0	0	0	2	2	2	2	2	0	0	0	0	0
3B_767284492	0	2	0	0	2	0	0	0	2	0	0	0	0	2	0	2	2	2	2	0	2	2	2	0	2	0	2	0	2	0	0	2	0	0	0	2	0	0	0	2	2	0	2	2	0	0	0	0	0
3B_764742114	0	2	0	0	2	0	0	0	2	0	2	0	0	2	0	2	2	2	2	0	2	2	2	0	2	2	2	0	2	0	0	2	2	0	2	2	0	0	2	2	2	2	2	2	0	0	0	0	0
3B_761465652	0	2	0	0	2	0	0	0	2	0	2	0	0	2	0	2	2	2	2	0	2	2	2	0	2	2	2	2	2	0	0	0	2	0	2	2	0	0	2	2	2	2	2	2	0	0	0	0	0
3B_759449813	0	2	0	0	2	2	0	0	2	0	2	0	0	2	0	2	2	2	2	0	2	2	2	0	2	2	2	2	2	0	0	0	2	0	2	2	0	0	0	2	2	2	2	2	0	0	0	0	0
3B_751013879	0	2	0	0	2	2	0	0	2	0	2	0	0	2	0	2	2	2	2	0	2	2	2	0	2	0	2	2	2	0	0	0	2	0	2	2	0	0	0	2	2	2	2	2	0	0	0	0	0
3B_750131708	0	2	0	0	2	2	0	0	2	0	2	0	0	2	0	2	2	2	2	0	2	2	2	0	2	2	2	2	2	0	0	0	2	0	2	2	0	0	0	2	2	2	2	2	0	0	0	0	0
3B_749137398	0	0	0	0	2	2	0	0	2	0	2	0	0	2	0	2	2	2	2	0	2	2	2	0	2	2	2	2	2	0	0	0	2	0	-1	2	0	0	0	2	2	2	2	2	0	0	0	0	0
3B_748417876	0	2	0	0	2	2	0	0	2	0	2	0	0	2	0	2	2	2	2	0	2	2	2	0	2	-1	2	2	2	0	0	0	2	0	2	2	0	0	0	2	2	2	2	2	0	0	0	0	0
3B_749137429	0	0	0	0	2	2	0	0	2	0	2	0	0	2	0	2	2	-1	2	0	2	2	2	0	2	0	2	2	2	0	0	0	2	0	2	2	0	0	0	2	2	2	2	2	0	0	0	0	0
3B_752966768	0	0	0	0	-1	2	0	0	2	0	2	0	0	2	0	2	2	2	2	0	2	2	2	0	2	0	2	2	2	0	0	0	-1	0	2	-1	0	0	0	-1	-1	2	2	-1	0	0	0	0	0
3B_751943372	0	2	0	0	2	2	0	0	2	0	2	0	0	2	0	2	2	2	2	0	2	2	2	0	2	0	2	2	2	0	0	0	2	0	2	2	0	0	0	2	2	2	2	2	0	0	0	0	0
3B_748417744	0	2	0	0	2	2	0	0	2	0	2	0	0	2	0	2	2	2	2	0	2	2	2	0	2	-1	2	2	2	0	0	0	2	0	2	2	0	0	0	2	2	2	2	2	0	0	0	0	0
3B_738761356	0	2	0	0	2	2	0	0	2	0	2	0	0	2	0	2	2	2	2	0	2	2	2	0	2	0	2	2	2	0	0	0	2	0	2	2	0	0	0	2	2	2	2	2	0	0	0	0	0
3B_738758982	0	2	0	0	2	2	0	0	2	0	2	0	0	2	0	2	2	2	2	0	2	2	2	0	2	2	2	2	2	0	0	0	2	0	2	2	0	0	0	2	2	2	2	2	0	0	0	0	0
3B_736664044	0	2	0	0	2	2	0	0	2	0	2	0	0	2	0	2	2	2	2	0	2	2	2	0	2	2	2	2	2	0	0	0	2	0	2	2	0	0	0	2	2	2	2	2	0	0	0	0	0
3B_733329204	0	2	0	0	2	2	0	0	2	0	2	0	0	2	0	2	2	2	2	0	2	2	2	0	2	2	2	2	2	0	0	0	2	0	2	2	0	0	0	2	2	2	2	2	0	0	0	0	0
3B_719457438	0	2	0	0	2	2	0	0	2	0	2	0	2	2	0	2	2	2	2	0	2	2	2	0	2	2	2	2	2	0	0	0	2	0	2	2	0	0	0	2	2	2	2	2	0	0	0	0	0
3B_724746254	0	2	0	0	2	2	0	0	2	0	2	0	2	2	0	2	2	2	2	0	2	2	2	0	2	0	2	2	2	0	0	0	2	0	2	2	0	0	0	2	2	2	2	2	0	0	0	0	0
3B_722455022	0	-1	0	0	2	-1	0	0	2	0	2	0	2	2	0	2	2	2	2	0	2	2	2	-1	2	2	2	2	2	0	0	0	2	0	2	2	0	0	0	-1	2	2	2	-1	0	0	0	0	0
3B_711757432	0	2	0	0	2	2	-1	0	2	2	2	0	2	2	0	2	2	2	2	0	2	2	2	0	2	2	2	2	2	0	0	0	2	0	2	2	0	0	0	2	2	2	2	2	0	0	0	0	0
3B_716403958	0	2	0	0	2	2	0	0	2	0	2	0	2	2	0	2	2	2	2	0	2	2	2	-1	2	2	2	2	2	0	0	0	2	0	2	2	0	0	0	2	2	2	2	2	0	0	0	0	2
3B_732314158	0	2	0	0	2	2	0	0	2	0	2	0	2	2	0	2	2	2	2	0	2	2	2	0	2	2	2	2	2	0	0	0	2	0	2	2	0	0	0	2	2	2	2	2	0	0	0	0	0
3B_707640336	0	2	0	0	2	2	0	0	2	0	2	0	2	2	0	2	2	2	2	0	2	2	2	0	2	2	2	2	2	0	0	0	2	0	2	2	0	0	0	2	2	2	2	2	0	0	0	0	0
3B_730828556	0	2	0	0	2	2	0	0	2	0	2	0	2	2	0	2	2	2	2	0	2	2	2	0	2	2	2	2	2	0	0	0	2	0	2	2	0	0	0	2	2	2	2	2	0	0	0	0	0
3B_685018788	0	2	0	0	2	2	0	0	2	0	2	0	2	2	0	2	2	2	2	0	2	2	2	0	2	2	0	2	2	0	0	0	2	0	2	2	0	0	0	2	2	2	2	2	0	0	0	0	0
3B_683057859	0	2	0	0	2	2	0	0	2	0	2	0	2	2	0	2	2	2	2	0	0	2	2	0	2	2	0	2	2	0	0	0	2	0	2	2	0	0	0	2	2	2	2	2	0	0	0	0	0
3B_675257589	0	2	0	0	2	2	0	0	2	0	2	0	2	2	0	2	2	2	2	0	0	2	2	0	2	2	0	2	2	0	0	0	2	0	2	2	0	0	0	2	2	2	2	2	0	0	0	0	0
3B_676285835	0	2	0	0	2	2	0	0	2	0	2	0	2	2	0	2	2	2	2	0	0	2	2	0	2	2	0	2	2	0	0	0	2	0	2	2	0	0	0	2	2	2	2	2	0	0	0	0	0
3B_676285806	0	2	0	0	2	2	0	0	2	0	2	0	2	2	0	2	2	2	2	0	0	2	2	-1	2	2	0	2	2	0	0	0	2	0	2	2	0	0	0	2	2	2	2	2	0	0	0	0	0
3B_638948689	0	2	0	0	2	2	0	0	2	0	2	0	2	0	0	2	2	2	2	0	0	2	0	0	2	2	0	2	2	0	0	0	2	0	2	2	0	0	0	2	2	2	0	2	0	0	0	0	2
3B_604276759	0	2	0	0	2	2	0	0	2	0	2	0	2	0	0	2	2	2	2	0	0	2	0	0	2	2	0	2	2	0	0	0	2	0	2	2	0	0	0	2	2	2	0	2	0	0	0	0	2
3B_598912511	0	2	0	0	2	2	0	0	2	0	2	0	2	0	0	2	2	2	2	0	0	2	0	0	2	2	0	2	2	0	0	0	2	0	2	2	0	0	0	2	2	2	0	2	0	0	0	0	2
3B_595670892	-1	2	0	0	2	2	0	-1	2	-1	2	0	2	0	0	2	2	2	2	0	0	2	0	0	2	2	0	-1	2	0	0	0	2	0	2	2	-1	0	0	-1	2	2	0	-1	0	0	0	0	2
3B_593571416	0	2	0	0	2	2	0	0	2	0	2	0	2	0	0	2	2	2	2	0	0	2	0	0	2	2	0	2	2	0	0	0	2	0	2	2	0	0	0	2	2	2	0	2	0	0	0	0	2
3B_581073077	0	2	0	0	2	0	0	0	2	0	2	0	2	0	0	2	2	2	2	0	0	2	0	0	2	2	0	2	2	0	0	0	2	0	2	2	0	0	0	2	2	2	0	2	0	0	0	0	2
3B_586733623	0	2	0	0	2	0	0	0	2	0	2	0	2	0	0	2	2	2	2	0	0	2	0	0	2	2	0	2	2	0	0	0	2	0	2	2	0	0	0	2	2	2	0	2	0	0	0	0	2
3B_586543362	0	2	0	0	2	0	0	0	2	0	2	0	2	0	0	2	2	2	2	0	0	2	0	0	2	2	0	2	2	0	0	0	2	0	2	2	0	0	0	2	2	2	0	2	0	0	0	0	2
3B_581624130	0	2	0	0	2	0	0	0	2	0	2	0	2	0	0	2	2	2	2	0	0	2	0	0	2	2	0	2	2	0	0	0	2	0	2	2	0	0	0	2	2	2	0	2	0	0	0	0	2
3B_561972756	0	2	0	0	2	0	0	0	2	0	2	0	2	0	0	2	2	2	2	0	0	2	0	0	2	2	0	2	2	0	0	0	2	0	2	2	0	0	0	2	2	2	0	2	0	0	0	0	2
3B_542649191	2	2	0	0	2	0	-1	0	2	0	2	0	2	0	0	2	2	2	2	0	0	2	0	0	2	2	0	2	2	0	0	0	2	0	2	0	0	0	0	2	2	0	0	2	0	0	0	0	2
3B_542631282	2	2	0	0	-1	0	0	0	2	0	2	0	0	0	0	2	2	2	2	0	0	2	0	-1	2	2	0	2	2	0	0	0	2	0	2	0	0	0	0	-1	2	0	0	2	0	0	0	0	2
3B_543717011	2	2	0	0	2	0	0	0	2	0	2	0	2	0	0	2	2	2	2	0	0	2	0	0	2	2	0	2	2	0	0	0	2	0	2	0	0	0	0	2	2	0	0	2	0	0	0	0	2
3B_554922486	2	2	0	0	2	0	0	0	2	0	2	0	2	0	0	2	2	2	2	0	0	2	0	0	2	2	0	2	2	0	0	0	2	0	2	0	0	0	0	2	2	2	0	2	0	0	0	0	2
3B_572277006	0	2	0	0	2	0	0	0	2	0	2	0	2	0	0	2	2	2	2	0	0	2	0	0	2	2	0	2	2	0	0	0	2	0	2	2	0	0	0	2	2	2	0	2	0	0	0	0	2
3B_572301054	0	2	0	0	2	0	0	0	2	0	2	0	2	0	0	2	2	2	2	0	0	2	0	0	2	2	0	2	2	0	0	0	2	0	2	2	0	0	0	2	2	2	0	2	0	0	0	0	2
3B_585727345	0	2	0	0	2	0	0	0	2	0	2	0	2	0	0	2	2	2	2	0	0	2	0	0	2	2	0	2	2	0	0	0	2	0	2	2	0	0	0	2	2	2	0	2	0	0	0	0	2
3B_585846704	0	2	0	0	2	0	0	0	2	0	2	0	2	0	0	2	2	2	2	0	0	2	0	0	2	2	0	2	2	0	0	0	2	0	2	2	0	0	0	2	2	2	0	2	0	0	0	0	2
3B_592271369	0	2	0	0	2	0	0	0	2	-1	2	0	2	0	0	2	2	2	2	0	0	2	0	0	2	2	0	2	2	0	0	0	2	0	2	2	-1	0	0	-1	2	2	0	2	0	0	0	0	2
3B_627747695	0	2	0	0	2	2	0	0	2	0	2	0	2	0	0	2	2	2	2	0	0	2	0	0	2	2	0	2	2	0	0	0	2	0	2	2	0	0	0	2	2	2	0	2	0	0	0	0	2
3B_649898939	0	2	0	0	2	0	0	0	2	0	0	0	2	0	0	2	2	2	2	0	0	2	0	0	2	0	0	2	2	0	0	0	2	0	2	2	0	0	0	2	2	2	0	2	0	0	0	0	2
3B_609359925	0	2	0	0	2	2	0	0	2	0	2	0	2	0	0	2	2	2	2	0	0	2	0	-1	2	0	0	2	2	0	0	0	2	0	2	2	0	0	0	-1	2	2	0	-1	0	0	0	0	-1
3B_620204195	0	2	0	0	2	2	0	0	2	0	2	0	2	0	0	2	2	2	2	0	0	2	0	0	2	0	0	2	2	0	0	0	2	0	2	2	0	0	0	2	2	2	0	2	0	0	0	0	2
3B_592694374	0	2	0	0	2	2	0	0	2	0	2	0	2	0	0	2	2	2	2	0	0	2	0	0	2	0	0	2	2	0	0	0	2	0	2	2	0	0	0	2	2	2	0	2	0	0	0	0	2
3B_595671050	0	2	0	0	2	2	0	0	2	0	2	0	2	0	0	2	2	2	2	0	0	2	0	0	2	0	0	2	2	0	0	0	2	0	2	2	0	0	0	2	2	2	0	2	0	0	0	0	2
3B_590632391	0	2	0	0	2	0	0	0	2	0	2	0	2	0	0	2	2	2	2	0	0	2	0	0	2	0	0	2	2	0	0	0	2	0	2	2	0	0	0	2	2	2	0	2	0	0	0	0	2
3B_560274100	0	2	0	0	2	0	0	0	2	0	2	0	2	0	0	2	2	2	2	0	0	2	0	0	2	0	0	2	2	0	0	0	2	0	2	2	0	0	0	2	2	2	0	2	0	0	0	0	2
3B_545856136	2	2	0	0	2	0	0	0	2	0	2	0	2	0	0	2	2	2	2	0	0	2	0	0	2	0	0	2	2	0	0	0	2	0	2	0	0	0	0	2	2	0	0	2	0	0	0	0	2
3B_551012180	2	2	0	0	2	0	-1	0	2	0	2	0	2	0	2	2	2	2	2	0	0	2	0	0	2	0	0	2	2	0	0	0	2	0	2	0	0	0	0	2	2	0	0	2	0	0	0	0	2
3B_551012131	2	2	0	0	2	0	0	0	2	0	2	0	2	0	0	2	2	2	2	0	0	2	0	0	2	0	0	2	2	0	0	0	2	0	2	0	0	0	0	2	2	0	0	2	0	0	0	0	2
3B_519815941	2	2	0	0	2	0	0	0	2	0	2	0	2	0	0	2	2	2	2	0	0	2	0	0	2	0	0	2	2	0	0	0	2	0	2	0	0	0	0	0	2	0	0	2	0	0	0	0	2
3B_508486793	2	2	0	0	2	0	0	0	2	0	2	0	2	0	0	2	2	2	2	0	0	2	0	0	2	0	0	2	2	0	0	0	2	0	2	0	0	0	0	0	2	0	0	2	0	0	0	0	2
3B_508486802	2	2	0	0	2	0	0	0	2	0	2	0	2	0	0	2	2	2	2	0	0	2	0	0	2	0	0	2	2	0	0	0	2	0	2	0	0	0	0	0	2	0	0	2	0	0	0	0	2
3B_441464394	2	2	0	0	2	0	2	0	2	0	2	0	2	0	0	2	2	2	2	0	0	2	0	0	2	0	0	2	2	0	0	0	2	0	2	0	0	0	0	0	2	0	0	2	0	0	0	0	2
3B_437601469	2	2	0	0	2	0	2	0	2	0	2	0	2	0	0	2	2	2	2	0	0	2	0	0	2	0	0	2	2	0	0	0	2	0	2	0	0	0	0	0	2	0	0	2	0	0	0	0	2
3B_525015490	-1	-1	0	0	2	0	0	0	2	-1	2	0	2	0	0	2	2	2	2	0	0	2	0	-1	2	0	0	2	2	0	0	0	2	0	2	0	0	0	0	-1	2	0	0	2	0	0	0	0	-1
3B_509509456	2	2	0	0	2	0	0	0	2	0	2	0	2	0	0	2	2	2	2	0	0	2	0	0	2	0	0	2	2	0	0	0	2	0	2	0	0	0	0	0	2	0	0	2	0	0	0	0	2
3B_487554310	2	2	0	0	2	0	0	0	2	0	2	0	2	0	0	2	2	2	2	0	0	2	0	0	2	0	0	2	2	0	0	0	2	0	2	0	0	0	0	0	2	0	0	2	0	0	0	0	2
3B_474844959	2	2	0	0	2	0	0	0	2	0	2	0	2	0	0	2	2	2	2	0	0	2	0	0	2	0	0	2	2	0	0	0	2	0	2	0	0	0	0	0	2	0	0	2	0	0	0	0	2
3B_422389518	2	-1	0	0	2	0	2	0	2	0	2	0	2	0	0	2	2	2	2	0	0	2	0	0	2	0	0	2	2	0	0	0	2	0	2	0	0	0	0	0	2	0	0	2	0	0	0	0	2
3B_343661395	2	2	0	0	2	0	2	0	2	0	2	0	2	0	0	2	2	2	2	0	0	2	0	0	2	0	0	2	2	0	0	0	2	0	2	0	0	0	0	0	2	0	0	2	0	0	0	0	2
3B_418449349	2	2	0	0	2	0	2	0	2	0	2	0	2	0	0	2	2	2	2	0	0	2	0	0	2	2	0	2	2	0	0	0	2	0	2	0	0	0	0	0	2	0	0	2	0	0	0	0	2
3B_416136779	2	2	0	0	2	0	2	0	2	0	2	0	2	0	0	2	2	2	2	0	0	2	0	0	2	2	0	2	2	0	0	0	2	0	2	0	0	0	0	0	2	0	0	2	0	0	0	0	2
3B_244023572	2	2	0	2	2	0	2	0	2	0	2	0	2	0	0	2	2	2	2	0	0	2	0	0	2	2	0	2	2	0	0	0	2	0	2	0	0	0	0	0	2	0	0	2	0	0	0	0	2
3B_379344465	2	2	0	0	2	0	2	0	2	0	2	0	2	0	0	2	2	2	2	0	0	2	0	0	2	2	0	2	2	0	0	0	2	0	2	0	0	0	0	0	2	0	0	2	0	0	0	0	2
3B_372908321	2	2	0	0	2	-1	-1	0	2	-1	2	0	2	0	0	2	2	2	2	0	-1	2	0	-1	2	2	0	-1	2	0	0	0	2	0	2	0	-1	0	0	0	2	0	0	2	0	0	0	0	2
3B_247207394	2	2	0	0	2	0	2	0	2	0	2	0	2	0	0	2	2	2	2	0	0	2	0	0	2	2	0	2	2	0	0	0	2	0	2	0	0	0	0	0	2	0	0	2	0	0	0	0	2
3B_254782182	2	2	0	0	2	0	2	0	2	0	2	0	2	0	0	2	2	2	2	0	0	2	0	0	2	2	0	2	2	0	0	0	2	0	2	0	0	0	0	0	2	0	0	2	0	0	0	0	2
3B_258618995	2	2	0	0	2	0	2	0	2	0	2	0	2	0	0	2	2	2	2	0	0	2	0	0	2	2	0	2	2	0	0	0	2	0	2	0	0	0	0	0	2	0	0	2	0	0	0	0	2
3B_453355010	2	2	0	0	2	0	2	0	2	0	2	0	2	0	0	2	2	2	2	0	0	2	0	0	2	2	0	2	2	0	0	0	2	0	2	0	0	0	0	0	2	0	0	2	0	0	0	0	2
3B_456404539	2	2	0	0	2	0	0	0	2	-1	2	0	2	0	0	2	2	2	2	0	0	2	0	0	2	2	0	2	2	0	0	0	2	-1	2	0	0	0	0	0	2	0	0	2	0	0	0	0	2
3B_455537503	2	2	0	0	2	0	0	0	2	0	2	0	2	0	0	2	2	2	2	0	0	2	0	0	2	2	0	2	2	0	0	0	2	0	2	0	0	0	0	0	2	0	0	2	0	0	0	0	2
3B_455537508	2	2	0	0	2	0	0	0	2	0	2	0	2	0	0	2	2	2	2	0	0	2	0	0	2	2	0	2	2	0	0	0	2	0	2	0	0	0	0	0	2	0	0	2	0	0	0	0	2
3B_452981929	2	2	0	0	2	0	2	0	2	0	2	0	2	0	0	2	2	2	2	0	0	2	0	0	2	2	0	2	2	0	0	0	2	-1	2	0	0	0	0	0	2	0	0	2	0	0	0	0	2
3B_445338984	2	2	0	0	2	0	2	0	2	0	2	0	2	0	0	2	2	2	2	0	0	2	0	0	2	0	0	2	2	0	0	0	2	0	2	0	0	0	0	0	2	0	0	2	0	0	0	0	2
3B_469634798	2	2	0	0	2	0	0	0	2	0	2	0	2	0	0	2	2	2	2	0	0	2	0	0	2	0	0	2	2	0	0	0	2	0	2	0	0	0	0	0	2	0	0	2	0	0	0	0	2
3B_505569074	2	2	0	0	2	0	0	0	2	0	2	0	2	0	0	2	2	2	2	0	0	2	0	0	2	0	0	2	2	0	0	0	2	0	2	0	0	0	0	0	2	0	0	2	0	0	0	0	2
3B_310785635	-1	0	0	0	2	0	0	0	-1	0	2	0	-1	0	0	2	2	2	2	0	0	-1	0	-1	-1	0	0	2	-1	0	0	0	2	0	2	0	0	0	0	0	2	0	0	-1	0	0	0	0	-1
3B_247207322	2	2	0	0	2	0	2	0	2	0	2	0	2	0	0	2	2	2	2	0	0	2	0	0	2	0	0	2	2	0	0	0	2	0	2	0	0	0	0	0	2	0	0	2	0	0	0	0	2
3B_408591144	-1	2	0	0	2	0	-1	0	2	-1	2	0	-1	0	0	2	2	2	2	0	0	2	0	-1	2	0	0	-1	2	0	0	0	2	0	2	0	-1	0	0	0	2	0	0	2	0	0	0	0	-1
3B_260343602	2	2	0	0	2	0	2	0	2	0	2	0	2	0	0	2	2	2	2	0	0	2	0	0	2	0	0	2	2	0	0	0	2	0	2	0	0	0	0	0	2	0	0	2	0	0	0	0	-1
3B_328200643	2	2	0	-1	2	0	2	0	2	-1	2	0	2	-1	0	2	2	2	2	0	0	2	0	-1	2	0	0	2	2	0	-1	0	2	0	2	-1	-1	-1	0	-1	2	0	0	2	2	0	0	-1	2
3B_287520093	2	2	0	0	2	0	2	0	2	0	2	0	2	0	0	2	2	2	2	0	0	2	0	-1	2	0	0	2	2	0	0	0	2	0	2	0	0	0	0	2	2	0	0	2	0	0	0	0	2
3B_257025730	2	2	-1	-1	2	0	2	0	2	0	2	0	2	-1	0	2	2	2	2	0	-1	2	0	2	2	0	0	2	2	0	0	0	2	-1	2	-1	0	0	0	-1	2	0	0	2	-1	-1	0	0	2
3B_312733367	2	2	0	0	2	0	2	0	2	0	2	0	2	0	0	2	2	2	2	0	0	2	0	2	2	0	-1	2	2	0	0	0	2	-1	2	0	0	0	0	0	2	0	0	2	0	0	0	0	2
3B_344296760	2	2	0	0	2	0	2	0	2	0	2	0	2	0	0	2	2	2	2	0	0	2	0	0	2	0	0	2	2	0	0	0	2	0	2	0	0	0	0	0	2	0	0	2	0	0	0	0	2
3B_256451885	2	2	0	0	2	0	2	0	2	0	2	0	2	0	0	2	2	2	2	0	0	2	0	0	2	0	0	2	2	0	0	0	2	0	2	0	0	0	0	0	2	0	0	2	0	0	0	0	2
3B_203265279	2	2	0	2	2	0	2	0	2	0	2	0	2	0	0	2	2	2	2	0	0	2	0	0	2	0	0	2	2	0	0	0	2	0	2	0	0	0	0	0	2	0	0	2	0	0	0	0	2
3B_217452695	-1	-1	0	2	2	0	2	0	2	-1	2	0	-1	0	0	2	2	-1	2	0	0	2	0	-1	2	-1	-1	-1	2	0	0	0	2	0	2	0	0	0	0	-1	2	0	0	-1	0	0	0	0	-1
3B_246108343	-1	-1	-1	2	2	0	2	-1	2	0	2	0	-1	0	0	2	2	2	2	0	0	-1	0	-1	2	0	0	2	2	0	0	0	2	0	2	0	0	0	0	-1	-1	0	0	-1	0	0	0	0	2
3B_191293190	2	2	0	2	2	0	2	0	2	0	2	0	2	0	0	2	2	2	2	0	0	2	0	0	2	0	0	2	2	0	0	0	2	0	2	0	0	0	0	0	2	0	0	2	0	0	0	0	2
3B_187866170	2	2	0	2	2	0	2	0	2	0	2	0	2	0	0	2	2	2	2	0	0	2	0	0	2	0	0	2	2	0	0	0	2	0	2	0	0	0	0	0	2	0	0	2	0	0	0	0	2
3B_228823756	2	2	0	2	2	0	2	0	2	0	2	0	2	0	0	2	2	2	2	0	0	2	0	0	2	0	0	2	2	0	0	0	2	0	2	0	0	0	0	0	2	0	0	2	0	0	0	0	2
3B_423362772	2	2	0	0	2	0	2	0	2	0	2	0	2	0	0	2	2	2	2	0	0	2	0	0	2	0	0	2	2	0	0	0	2	0	2	0	0	0	0	0	2	0	0	2	0	0	0	0	2
3B_200715967	2	2	0	2	2	0	2	0	2	0	2	0	2	0	0	2	2	2	2	0	0	2	0	0	2	0	0	2	2	0	0	0	2	-1	2	0	0	0	0	0	2	0	0	2	0	0	0	0	2
3B_69813881	0	-1	0	2	2	0	2	0	2	0	2	0	2	0	0	2	2	2	2	0	0	2	0	0	2	0	0	2	2	0	0	0	2	0	2	0	0	0	0	0	2	0	0	2	0	0	0	0	2
3B_66194730	0	2	0	2	2	0	2	0	2	0	2	0	2	0	0	2	2	2	2	0	0	2	0	0	2	2	0	2	2	0	0	0	2	0	2	0	0	0	0	0	2	0	0	2	0	0	0	0	2
3B_66194691	0	2	0	2	2	0	2	0	2	0	2	0	2	0	0	2	2	2	2	0	0	2	0	0	2	2	0	2	2	0	0	0	2	0	2	0	0	0	0	0	2	0	0	2	0	0	0	0	2
3B_63433962	0	-1	0	2	2	0	2	0	2	0	2	0	2	0	0	2	2	2	2	0	0	2	0	0	2	2	0	2	2	0	0	0	2	0	2	0	0	0	0	0	2	0	0	2	0	0	0	0	2
3B_60057343	0	2	0	2	2	0	2	0	2	0	2	0	2	0	0	2	2	2	2	0	0	2	0	0	2	2	0	2	2	0	0	0	2	0	2	0	0	0	0	0	2	0	0	2	0	0	0	0	2
3B_60880348	0	2	0	2	2	0	2	0	2	0	2	0	2	0	0	2	2	2	2	0	0	2	0	0	2	2	0	2	2	0	0	0	2	-1	2	0	0	0	0	0	2	0	0	2	0	0	0	0	2
3B_59064322	0	2	0	2	2	0	2	0	2	0	2	0	2	0	0	2	2	2	2	0	0	2	0	0	2	2	0	2	2	0	0	0	2	0	2	0	0	0	0	0	2	0	0	2	0	0	0	0	2
2B_722333110	0	2	2	0	0	0	0	0	0	2	0	0	0	2	2	0	2	0	0	0	0	2	0	0	0	2	2	2	0	0	0	0	2	0	0	2	2	2	0	2	0	0	0	0	2	2	0	0	0
2B_718545004	0	2	2	0	0	0	0	0	0	2	0	0	0	2	2	0	2	0	0	0	0	2	0	0	0	2	2	2	0	0	0	0	2	0	0	2	2	2	0	2	0	0	0	0	2	2	0	0	0
2B_714465363	0	2	2	0	0	2	0	0	0	2	2	0	0	2	2	0	2	0	0	0	0	2	2	0	0	2	2	2	0	0	2	0	2	0	0	2	2	2	2	2	0	0	0	0	2	2	2	0	0
2B_718545012	0	2	2	0	0	0	0	0	0	2	2	0	0	2	2	0	2	0	0	0	0	2	2	0	0	2	2	2	0	0	2	0	2	0	0	2	2	2	2	2	0	0	0	0	2	2	2	0	0
2B_750999911	0	2	2	0	0	0	0	0	0	2	2	0	0	2	2	0	2	0	0	0	0	2	2	0	0	0	2	2	0	0	2	0	2	0	0	2	2	2	2	2	0	0	0	0	2	2	2	0	0
2B_749105669	0	2	2	0	0	0	0	0	0	2	2	0	0	2	2	0	2	0	0	0	0	2	2	0	0	0	2	2	0	0	2	0	2	0	0	2	2	2	2	2	0	0	0	0	2	2	2	0	0
2B_722901278	0	2	2	0	0	0	0	0	0	2	2	0	0	2	2	0	2	0	0	0	0	2	2	0	0	2	2	2	0	0	2	0	2	0	0	2	2	2	2	2	0	0	0	0	2	2	2	0	0
2B_726131972	0	2	2	0	0	0	0	0	0	2	2	0	2	2	2	0	2	0	0	0	0	2	2	0	0	2	2	2	0	0	2	0	2	0	0	2	2	2	2	2	0	0	0	0	2	2	2	0	0
2B_729897279	0	2	2	0	0	0	0	0	0	-1	2	0	0	2	2	0	2	0	0	0	0	2	2	-1	0	2	2	2	0	0	2	0	2	0	0	2	2	2	2	2	0	0	0	0	2	2	2	0	0
2B_726131947	0	2	2	0	0	0	0	0	0	2	2	0	0	2	2	0	2	0	0	0	0	2	2	2	0	2	2	2	0	0	2	0	2	0	0	2	2	2	2	2	0	0	0	0	2	2	2	0	0
2B_734640501	0	2	2	0	0	0	0	0	0	2	2	0	0	2	2	0	2	0	0	0	0	2	2	0	0	2	2	2	0	0	2	0	2	0	0	2	2	2	2	2	0	0	0	0	2	2	2	0	0
2B_742472704	-1	2	2	0	0	0	0	0	0	2	2	0	-1	2	2	0	2	0	0	0	0	2	2	-1	0	2	2	2	0	0	2	0	2	0	0	2	2	2	2	2	0	0	0	0	2	2	2	0	-1
2B_714778871	0	2	2	0	0	2	0	0	0	2	2	0	0	2	2	0	2	0	0	0	0	2	2	0	0	2	2	2	0	0	2	0	2	0	0	2	2	2	2	2	0	0	0	0	2	2	2	0	0
2B_749105632	0	2	2	0	0	0	0	0	0	2	2	0	0	2	2	0	2	0	0	0	0	2	2	0	0	2	2	2	0	0	2	0	2	0	0	2	2	2	2	2	0	0	0	0	2	2	2	0	0
2B_706977913	0	2	0	0	0	0	0	0	0	0	2	0	0	2	2	0	2	0	0	0	0	2	2	0	0	2	2	2	0	0	2	0	2	0	0	2	2	2	2	2	0	0	0	0	2	2	2	0	0
2B_682259335	0	2	0	0	0	0	0	0	0	0	2	0	0	2	2	0	2	0	0	0	0	2	2	0	0	2	2	2	0	0	2	0	2	0	2	0	2	2	2	2	0	0	0	0	2	2	2	0	0
2B_682848604	0	2	0	0	0	0	0	0	0	0	2	0	0	2	2	0	2	0	0	0	0	2	2	0	0	2	2	2	0	0	2	0	2	0	2	0	2	2	2	2	0	0	0	0	2	2	2	0	0
2B_682228833	0	2	0	0	0	0	0	0	0	0	2	0	0	2	2	0	2	0	0	0	0	2	2	0	0	2	2	2	0	0	2	0	2	0	2	0	2	2	2	2	0	0	0	0	2	2	2	0	0
2B_682240827	0	2	0	0	0	0	0	0	0	0	2	0	0	2	2	0	2	0	0	0	0	2	2	0	0	2	2	2	0	0	2	0	2	0	2	0	2	2	2	2	0	0	0	0	2	2	2	0	0
2B_682259254	0	2	0	0	0	0	-1	0	0	0	2	0	0	2	2	0	2	0	0	0	0	2	2	0	0	2	2	2	0	0	2	0	2	0	2	0	2	2	2	2	0	0	0	0	2	2	2	0	0
2B_678013961	0	2	0	0	0	0	0	0	0	0	2	0	0	2	2	0	2	0	0	0	0	2	2	0	0	2	2	2	0	0	2	0	2	0	2	0	2	2	2	2	0	0	0	0	2	2	2	0	0
2B_657052587	0	2	0	0	0	0	0	0	0	0	2	0	0	2	2	0	0	0	0	0	0	2	2	0	0	2	2	2	0	0	2	0	2	0	2	0	2	2	2	2	0	0	0	0	2	2	2	0	0
2B_665517001	0	2	0	0	0	0	0	0	0	0	2	0	0	2	2	0	0	0	0	0	0	2	2	0	0	2	2	2	0	0	2	0	2	0	2	0	2	2	2	2	0	0	0	0	2	2	2	0	0
2B_667125416	0	2	0	0	0	0	0	0	0	0	2	0	0	2	2	0	0	0	0	0	0	2	2	0	0	2	2	2	0	0	2	0	2	0	2	0	2	2	2	2	0	0	0	0	2	2	2	0	0
2B_661459178	0	2	0	0	0	0	0	0	0	0	2	0	0	2	2	0	0	0	0	0	0	2	2	0	0	2	2	2	0	0	2	0	2	0	2	0	2	2	2	2	0	0	0	0	2	2	2	0	0
2B_661454401	0	2	0	0	0	0	0	0	0	-1	2	0	0	2	2	0	0	-1	0	0	0	2	2	-1	0	2	2	2	0	-1	2	0	2	-1	2	0	2	2	2	-1	0	0	0	0	2	2	2	0	-1
2B_653587587	0	2	0	0	0	0	0	0	0	0	2	0	0	2	2	0	0	0	0	0	0	2	2	0	0	2	2	2	0	0	2	0	2	0	2	0	2	2	2	2	0	0	0	0	2	2	2	0	0
2B_652852332	0	2	0	0	0	0	0	0	0	0	2	0	0	2	2	0	0	0	0	0	0	2	2	0	0	2	2	2	0	0	2	0	2	0	2	0	2	2	2	2	0	0	0	0	2	2	2	0	0
2B_652852359	0	2	0	0	0	0	0	0	0	0	2	0	0	2	2	0	0	0	0	0	0	2	2	0	0	2	2	2	0	0	2	0	2	0	2	0	2	2	2	2	0	0	0	0	2	2	2	0	0
2B_635151521	-1	2	0	0	0	0	0	0	0	-1	2	0	0	0	2	0	0	0	0	0	0	2	0	-1	0	2	2	-1	0	0	2	0	2	-1	2	0	2	2	2	-1	0	0	2	0	2	2	2	0	-1
2B_635151316	0	2	0	0	0	0	0	0	0	0	2	0	0	2	2	0	0	0	0	0	0	2	0	0	0	2	2	2	0	0	2	0	2	0	2	0	2	2	2	2	0	0	2	0	2	2	2	0	0
2B_605628346	0	2	0	0	0	0	0	0	0	0	2	0	0	2	2	0	0	0	0	0	0	2	0	0	0	2	2	2	0	0	2	0	2	0	2	0	2	2	2	2	0	0	2	0	2	2	2	2	0
2B_597886299	0	2	0	0	0	0	0	0	0	0	2	0	0	2	2	0	0	0	0	0	0	2	0	0	0	2	2	2	0	0	2	0	2	0	2	0	2	2	2	2	0	0	2	0	2	2	2	2	0
2B_616468918	0	2	0	0	0	0	0	0	0	0	2	0	0	2	2	0	0	0	0	0	0	2	0	0	0	2	2	2	0	0	2	0	2	0	2	0	2	2	2	2	0	0	2	0	2	2	2	2	0
2B_579875155	0	2	0	0	0	0	0	0	0	0	2	0	0	2	2	0	0	0	0	0	0	2	0	0	0	2	2	2	0	0	2	0	2	0	2	0	2	2	2	2	0	0	2	0	2	2	2	2	0
2B_572189018	0	2	0	0	0	0	0	0	0	0	2	0	0	2	2	0	0	0	0	0	0	2	0	0	0	2	2	2	0	0	2	0	2	0	2	0	2	2	2	2	0	0	2	0	2	2	2	2	0
2B_579875027	0	2	0	0	0	0	0	0	0	0	2	0	0	2	2	0	0	0	0	0	0	2	0	0	0	2	2	2	0	0	2	0	2	0	2	0	2	2	2	2	0	0	2	0	2	2	2	2	0
2B_582649606	0	2	0	0	0	0	0	0	0	0	2	0	0	2	2	0	0	0	0	0	0	2	0	0	0	2	2	2	0	0	2	0	2	0	2	0	2	2	2	2	0	0	2	0	2	2	2	2	0
2B_588095403	-1	2	0	0	0	0	0	-1	0	-1	2	-1	-1	2	2	0	0	0	0	-1	0	2	0	-1	0	2	2	2	-1	0	2	0	2	0	2	-1	2	2	2	-1	-1	0	2	-1	2	2	2	2	-1
2B_575171631	0	2	0	0	0	0	0	0	0	0	2	0	0	2	2	0	0	0	0	0	0	2	0	0	0	2	2	2	0	0	2	0	2	0	2	0	2	2	2	2	0	0	2	0	2	2	2	2	0
2B_567714930	0	2	0	0	0	0	0	0	0	0	2	0	0	2	2	0	0	0	0	0	0	2	0	-1	0	2	2	2	0	0	2	0	2	0	2	0	2	2	2	2	0	0	2	0	2	2	2	2	0
2B_553862488	0	2	0	0	0	0	0	0	0	0	2	0	0	2	2	0	0	0	0	0	0	2	0	0	0	2	2	2	0	0	2	0	2	0	2	0	2	2	0	2	0	0	2	0	2	2	2	2	0
2B_558167214	0	2	0	0	0	0	0	0	0	0	2	0	0	2	2	0	0	0	0	0	0	2	0	0	0	2	2	2	0	0	2	0	2	0	2	0	2	2	0	2	0	0	2	0	2	2	2	2	0
2B_553862490	0	2	0	0	0	0	0	0	0	0	2	0	0	2	2	0	0	0	0	0	0	2	0	0	0	2	2	2	0	0	2	0	2	0	2	0	2	2	0	2	0	0	2	0	2	2	2	2	0
2B_558167480	0	2	0	-1	0	0	0	0	0	-1	2	0	0	2	2	0	0	0	0	0	-1	2	0	-1	0	-1	2	-1	0	0	2	0	2	0	2	0	-1	2	0	-1	0	0	2	0	2	2	2	2	-1
2B_529676852	0	2	0	0	0	0	0	0	0	0	2	0	0	2	2	0	0	0	0	0	0	2	0	0	0	2	2	2	0	0	2	0	2	0	2	0	2	2	0	2	0	0	2	0	2	2	2	2	0
2B_529616904	2	2	0	0	2	0	0	2	0	0	2	0	2	2	2	2	0	0	0	2	0	2	0	2	0	2	2	2	0	0	2	0	2	2	2	0	2	2	2	2	0	0	2	0	2	2	2	2	0
2B_522211495	0	2	0	0	0	0	0	0	0	0	2	0	0	2	2	0	0	0	0	0	0	2	0	0	0	2	2	2	0	0	2	0	2	0	2	0	2	2	0	2	0	0	2	0	2	2	2	2	0
2B_507445457	0	2	0	0	0	0	0	0	0	0	2	0	0	2	2	0	0	0	0	0	0	2	0	0	0	2	2	2	0	0	2	0	2	0	2	0	2	2	0	2	0	0	2	0	2	2	2	2	0
2B_500657493	0	2	0	0	0	0	0	0	0	0	2	0	0	2	2	0	0	0	0	0	0	2	0	0	0	2	2	2	0	0	2	0	2	0	2	0	2	2	0	2	0	0	2	0	2	2	2	2	0
2B_490872586	0	2	0	0	0	0	0	0	0	0	0	0	0	2	2	0	0	0	0	0	0	2	0	0	0	2	2	2	0	0	2	0	2	0	2	0	2	2	0	2	0	0	2	0	2	2	2	2	0
2B_479482625	0	2	0	0	0	0	0	0	0	0	0	0	0	2	2	0	0	0	0	0	0	2	0	0	0	2	2	2	0	0	2	0	2	0	2	0	2	2	0	2	0	0	2	0	2	2	2	2	0
2B_448134913	0	2	0	0	0	0	0	0	0	0	0	0	0	2	2	0	0	0	0	0	0	2	0	0	0	2	2	2	0	0	2	0	2	0	2	0	2	2	0	2	0	0	2	0	2	2	2	2	0
2B_468662680	0	2	0	0	0	0	0	0	0	0	0	0	0	2	2	0	0	0	0	0	0	2	0	0	0	2	2	2	0	0	2	0	2	0	2	0	2	2	0	2	0	0	2	0	2	2	2	2	0
2B_426151318	0	2	0	0	0	0	0	0	0	0	0	0	0	2	2	0	0	0	0	0	0	2	0	0	0	0	2	2	0	0	2	0	2	0	2	0	2	2	0	2	0	0	2	0	2	2	2	2	0
2B_422032221	0	2	0	0	0	0	0	0	0	0	0	0	0	2	2	0	0	0	0	0	0	2	0	0	0	0	2	2	0	0	2	0	2	0	2	0	2	2	0	2	0	0	0	0	2	2	2	2	0
2B_396120772	0	2	0	0	0	0	0	0	0	0	0	0	0	2	2	0	0	0	0	0	0	2	0	0	0	0	2	2	0	0	2	0	2	0	2	0	2	2	0	2	0	0	0	0	2	2	2	2	0
2B_394980882	0	2	0	0	0	0	0	0	0	0	0	0	0	2	2	0	0	0	0	0	0	2	0	0	0	0	2	2	0	0	2	0	2	0	2	0	2	2	0	2	0	0	0	0	2	2	2	2	0
2B_403581918	0	-1	0	0	0	0	0	0	0	0	0	0	0	2	2	0	0	0	0	0	0	2	0	-1	0	0	2	2	0	0	2	0	2	0	2	0	-1	2	0	-1	0	0	0	0	2	2	2	2	-1
2B_396030756	0	2	0	0	0	0	-1	0	0	0	0	0	0	2	2	0	0	0	0	0	0	2	0	0	0	0	2	2	0	0	2	0	2	0	2	0	2	2	0	2	0	0	0	0	2	2	2	2	0
2B_383141007	-1	-1	0	0	0	0	0	-1	0	-1	0	0	-1	2	2	0	0	0	0	0	0	2	0	-1	0	0	2	-1	0	0	2	0	2	-1	2	0	2	2	0	-1	0	0	0	0	2	0	2	2	-1
2B_297999025	0	2	0	0	0	0	0	0	0	0	0	0	0	2	2	0	0	0	0	0	0	2	0	0	0	0	2	2	0	0	2	0	2	0	2	0	2	2	0	2	0	0	0	0	2	0	2	2	0
2B_247952769	0	2	0	0	0	0	0	0	0	0	0	0	0	2	2	0	0	0	0	0	0	2	0	0	0	0	2	2	0	0	2	0	2	0	2	0	2	2	0	2	0	0	0	0	2	0	2	2	0
2B_187632562	0	-1	0	0	0	0	0	0	-1	0	0	0	0	2	-1	0	0	0	0	0	0	-1	0	-1	0	0	2	2	0	0	-1	0	2	0	-1	0	-1	2	0	-1	0	0	0	0	-1	0	2	2	0
2B_162775090	0	2	0	0	0	0	0	0	2	0	0	0	0	2	2	0	0	0	0	0	0	2	0	0	0	0	2	2	0	0	2	0	2	0	2	0	2	2	0	2	0	0	0	0	2	0	2	2	0
2B_207149824	0	2	0	0	0	0	0	0	0	0	0	0	0	2	2	0	0	0	0	0	0	2	0	0	0	0	2	2	0	0	2	0	2	0	2	0	2	2	0	2	0	0	0	0	2	0	2	2	0
2B_200710374	0	2	0	0	0	0	0	0	0	0	0	0	0	2	2	0	0	2	0	0	0	2	0	0	0	0	2	2	0	0	2	0	2	0	2	0	2	2	0	2	0	0	0	0	2	0	2	2	0
2B_199236813	0	2	0	0	0	0	0	0	0	0	0	0	0	2	2	0	0	0	0	0	0	2	0	0	0	0	2	2	0	0	2	0	2	0	2	0	2	2	0	2	0	0	0	0	2	0	2	2	0
2B_168534075	0	2	0	0	0	0	0	0	2	0	0	0	0	2	2	0	0	0	0	0	0	2	0	0	0	0	2	2	0	0	2	0	2	0	2	0	2	2	0	2	0	0	0	0	2	0	2	2	0
2B_192389178	0	2	0	0	0	0	0	0	2	0	0	0	0	2	2	0	0	0	0	0	0	2	0	0	0	2	2	2	0	0	2	0	2	0	2	0	2	2	0	2	0	0	0	0	2	0	2	2	0
2B_189706341	0	2	0	0	0	0	-1	0	2	0	0	0	0	2	2	0	0	0	0	0	0	2	0	0	0	2	2	2	0	0	2	0	2	0	2	0	2	2	0	2	0	0	0	0	2	0	2	2	0
2B_181966650	0	2	0	0	0	0	0	0	2	0	0	0	0	2	2	0	0	0	0	0	0	2	0	0	0	2	2	2	0	0	2	0	2	0	2	0	2	2	0	2	0	0	0	0	2	0	2	2	0
2B_175497139	0	2	0	0	0	0	-1	0	2	0	0	0	0	2	2	0	0	0	0	0	0	2	0	0	0	2	2	2	0	0	2	0	2	0	2	0	2	2	0	2	0	0	0	0	2	0	2	2	0
2B_168534165	0	2	0	0	0	0	0	0	2	0	0	0	0	2	2	0	0	0	0	0	0	2	0	0	0	0	2	2	0	0	2	0	2	0	2	0	2	2	0	2	0	0	0	0	2	0	2	2	0
2B_164268389	0	2	0	0	0	0	0	0	2	0	0	0	0	2	2	0	0	0	0	0	0	2	0	0	0	0	2	2	0	0	2	0	2	0	2	0	2	2	0	2	0	0	0	0	2	0	2	2	0
2B_151463186	0	2	0	0	0	0	-1	0	2	0	0	0	0	2	2	0	0	0	0	0	0	2	0	0	0	0	2	2	0	0	2	0	2	0	2	0	2	2	0	2	0	0	0	0	2	0	2	2	0
2B_149015490	0	2	0	0	0	0	0	0	2	0	0	0	0	2	2	0	0	0	0	0	0	2	0	0	0	0	2	2	0	0	2	0	2	0	2	0	2	2	0	2	0	0	0	0	2	0	2	2	0
2B_154046818	0	2	0	0	0	0	0	0	2	0	0	0	0	2	2	0	0	0	0	0	0	2	0	0	0	0	2	2	0	0	2	0	2	0	2	0	2	2	0	2	0	0	0	0	2	0	2	2	-1
2B_158445765	0	2	0	0	0	0	0	0	2	0	0	0	0	2	2	0	0	0	0	0	0	2	0	0	0	0	2	2	0	0	2	0	2	0	2	0	2	2	0	2	0	0	0	0	2	0	2	2	0
2B_122765594	0	2	0	2	0	0	0	0	2	0	0	0	0	2	2	0	0	0	0	0	0	2	0	0	0	0	2	2	2	0	2	0	2	0	2	0	2	2	0	2	0	0	0	0	2	0	2	2	0
2B_101024507	0	2	0	2	0	0	0	0	2	0	0	0	0	2	2	0	0	2	0	0	0	2	0	0	0	0	2	2	2	0	2	0	2	0	2	0	2	2	0	2	0	0	0	0	2	0	2	2	0
2B_110375759	0	2	0	2	0	0	-1	0	2	0	0	0	0	2	2	0	0	2	0	0	0	2	0	0	0	0	2	2	2	0	2	0	2	0	2	0	2	2	0	2	0	0	-1	0	2	0	2	2	0
2B_100324738	0	2	0	2	0	0	0	0	2	0	0	0	0	2	2	0	0	2	0	0	0	2	0	0	0	0	2	2	2	0	2	0	2	0	2	0	2	2	0	2	0	0	0	0	2	0	2	2	0
2B_98298972	0	2	0	2	0	0	0	0	2	0	0	0	0	2	2	0	0	2	0	0	0	2	0	0	0	0	2	2	2	0	2	0	2	0	2	0	2	2	0	2	0	0	0	0	2	0	2	2	0
2B_95067270	0	2	0	2	0	0	0	0	2	0	0	0	0	2	2	0	0	2	0	0	0	2	0	0	0	2	2	2	2	0	2	0	2	0	2	0	2	2	0	2	0	0	0	0	2	0	2	2	0
2B_94921998	0	2	0	2	0	0	0	0	2	0	0	0	0	2	2	0	0	-1	0	0	0	2	0	-1	0	2	2	2	2	0	2	0	2	0	2	0	-1	2	0	-1	-1	0	-1	-1	2	0	2	2	-1
2B_92166741	0	2	0	2	0	0	0	0	2	0	0	0	0	2	2	0	0	2	0	0	0	2	0	0	0	0	2	2	2	0	2	0	2	0	2	0	2	2	0	2	0	0	0	0	2	0	2	2	0
2B_92591704	0	2	0	2	0	0	0	0	2	0	0	0	0	2	2	0	0	2	0	0	0	2	0	0	0	0	2	2	2	0	2	0	2	0	2	0	2	2	0	2	0	0	0	0	2	0	2	2	0
2B_90523560	0	2	0	2	0	0	0	2	2	0	0	0	0	2	2	0	0	2	0	0	0	2	0	0	0	0	2	2	2	0	2	0	2	0	2	0	2	2	0	2	0	0	0	0	2	0	2	2	0
2B_91000402	0	2	0	2	-1	0	0	2	2	0	0	0	0	2	2	0	0	2	0	0	0	2	0	2	0	0	2	2	2	0	2	0	2	0	2	0	2	2	0	-1	0	0	0	0	2	0	2	2	0
2B_90342516	0	2	0	2	0	0	0	2	2	0	0	0	0	2	2	0	0	2	0	0	0	2	0	0	0	0	2	2	2	0	2	0	2	0	2	0	2	2	0	2	0	0	0	0	2	0	2	2	0
2B_89947808	0	2	0	2	0	0	-1	2	2	0	0	0	0	2	2	0	0	2	0	0	0	2	0	0	0	0	2	2	2	0	2	0	2	0	2	0	2	2	0	2	0	0	0	0	2	0	2	2	0
2B_76515060	0	2	0	2	0	0	0	2	2	0	0	0	0	2	2	0	0	2	0	0	0	2	0	0	0	0	0	2	2	0	2	0	2	0	2	0	2	2	0	2	0	0	0	0	2	0	2	2	0
2B_78467420	0	2	0	2	0	0	0	2	2	0	0	0	0	2	2	0	0	2	0	0	0	2	0	-1	0	0	0	2	2	0	2	0	2	0	2	0	2	2	0	2	0	0	0	-1	2	0	2	2	-1
2B_72594141	0	2	0	2	0	0	0	2	2	0	0	0	0	2	2	0	0	2	0	0	-1	2	0	-1	0	2	0	2	2	0	2	0	2	0	2	0	2	2	0	2	0	0	0	0	2	0	2	2	-1
2B_75613720	0	2	0	2	0	0	-1	2	2	0	0	0	0	2	2	0	0	2	0	0	0	2	0	0	0	2	0	2	2	0	0	0	2	0	2	0	2	2	0	2	0	0	0	0	2	0	0	2	0
2B_67981922	0	2	0	2	0	0	0	2	2	0	0	0	0	2	2	0	0	2	0	0	0	2	0	0	0	0	0	2	2	0	0	0	2	0	2	0	2	2	0	2	0	0	0	0	2	0	0	2	0
2B_60980523	0	2	0	2	0	0	2	2	2	0	0	0	0	2	2	0	0	2	0	0	0	2	0	0	0	0	0	2	2	0	0	2	2	0	2	0	2	2	0	2	0	0	0	0	2	0	0	2	0
2B_57119026	0	2	0	2	0	0	2	2	2	0	0	0	0	2	2	0	0	2	0	0	0	2	0	0	0	2	0	2	2	0	0	2	2	0	2	0	2	2	0	2	0	0	0	0	2	0	0	2	0
2B_54768734	0	2	0	2	0	0	2	2	2	0	0	0	0	2	2	0	0	2	0	0	0	2	0	0	0	2	0	2	2	0	2	2	2	0	2	0	2	2	0	2	0	0	0	0	2	0	2	2	0
2B_65440494	0	2	0	2	0	0	0	2	2	0	0	0	0	2	2	0	0	2	0	0	0	2	0	0	0	2	0	2	2	0	2	2	2	-1	2	0	2	2	0	2	0	0	0	0	2	0	2	2	0
2B_51057383	0	2	0	2	0	0	2	2	2	0	0	0	0	2	2	0	0	2	0	0	0	2	0	0	0	2	0	2	2	0	2	2	2	0	2	0	2	2	0	2	0	0	0	0	2	0	2	2	0
2B_47572609	0	2	0	2	0	0	2	2	2	0	0	0	0	2	2	0	0	2	0	0	0	2	0	0	0	2	0	2	2	0	2	2	2	0	2	0	2	2	0	2	0	0	0	0	2	0	2	2	0
2B_47237853	0	2	0	2	0	0	2	2	2	0	0	0	0	2	2	0	0	2	0	0	0	2	0	0	0	2	0	2	2	0	2	2	2	0	2	0	2	2	0	2	0	0	0	0	2	0	2	2	0
2B_41958287	0	2	0	2	0	0	2	2	2	0	0	0	0	2	2	0	0	2	0	0	0	2	0	0	0	2	0	2	2	0	2	2	2	0	2	0	2	2	0	2	0	0	0	0	2	0	2	2	0
2B_41958337	0	2	0	2	-1	0	2	2	2	0	0	0	0	2	2	0	0	2	0	0	0	2	0	0	0	2	0	2	2	0	2	2	2	0	2	0	2	2	0	2	0	0	0	0	2	0	2	2	0
2B_53026013	0	2	0	2	0	0	2	2	2	0	0	0	0	2	2	0	0	2	0	0	0	2	0	0	0	2	0	2	2	0	2	2	2	0	2	0	2	2	0	2	0	0	0	0	2	0	2	2	0
2B_39795004	0	2	0	2	0	0	2	2	2	0	0	0	0	2	2	0	0	2	0	0	2	2	0	0	0	2	0	2	2	0	2	2	2	-1	2	0	2	2	0	2	0	0	0	0	2	0	2	2	0
2B_31636229	0	0	0	2	0	0	2	2	2	0	0	0	0	2	2	0	0	2	0	0	2	2	0	2	0	2	0	2	2	0	0	2	2	0	2	0	2	2	0	2	0	0	0	0	2	0	0	2	0
2B_31021437	0	0	0	2	0	0	2	2	2	0	0	0	0	2	2	0	0	2	0	0	2	2	0	2	0	2	0	2	2	0	0	2	2	0	2	0	2	2	0	-1	0	0	0	0	2	0	0	2	0
2B_31021199	0	0	0	2	0	0	2	2	2	0	0	0	0	2	2	0	0	2	0	0	2	2	0	2	0	2	0	2	2	0	0	2	2	0	2	0	2	2	0	2	0	0	0	0	2	0	0	2	0
2B_31636243	0	0	0	2	0	0	-1	2	2	0	0	0	0	2	2	0	0	2	0	0	2	2	0	2	0	2	0	2	2	0	0	2	2	0	2	0	2	2	0	2	0	0	0	0	2	0	0	2	0
2B_20076513	0	0	2	2	0	0	2	2	0	0	0	0	0	0	2	0	0	2	0	0	2	2	2	2	0	2	0	2	2	0	0	2	2	2	2	0	0	0	0	0	2	2	0	0	0	0	0	2	2
2B_18638491	0	0	2	2	0	0	2	2	0	0	0	0	0	0	2	0	0	2	0	0	2	2	2	2	0	2	0	2	2	0	0	2	2	2	2	0	0	0	0	0	2	2	0	0	0	0	0	2	2
2B_6535931	0	0	2	0	0	0	2	2	0	2	0	0	0	0	0	0	2	2	2	2	2	2	2	2	0	2	0	0	0	2	2	2	2	2	2	0	0	2	2	0	2	0	2	2	0	0	2	2	0
2B_9764870	0	0	2	0	2	0	2	2	0	2	0	0	0	0	0	2	2	0	2	2	2	0	2	2	0	2	0	0	0	2	2	2	2	2	2	0	0	2	2	0	2	0	2	2	0	0	2	2	0
6A_592078037	2	0	0	0	2	2	0	0	2	2	0	0	2	2	0	0	2	0	2	0	0	2	2	2	0	0	2	2	0	2	2	0	0	0	0	2	0	2	2	2	0	2	0	2	2	0	2	0	0
6A_582665786	2	0	0	2	2	2	2	0	2	2	0	0	2	0	0	0	2	0	2	0	0	2	0	2	0	0	2	2	0	2	2	0	0	0	0	2	0	2	2	2	0	2	0	2	2	2	2	0	0
6A_579841057	2	0	0	2	2	2	2	0	2	2	0	0	2	0	0	0	2	0	2	0	0	2	0	2	0	2	2	2	0	2	2	0	0	0	0	2	0	2	2	2	0	2	0	2	2	2	2	0	0
6A_579445854	2	0	0	2	2	2	2	0	2	2	0	0	2	0	0	0	2	0	2	0	0	2	0	2	0	2	2	2	0	2	2	0	0	-1	0	2	0	2	2	2	0	2	-1	2	2	2	2	0	-1
6A_579422674	2	0	0	2	2	2	2	0	2	2	0	0	2	0	0	0	2	0	2	0	0	2	0	2	0	2	2	2	0	2	2	0	0	0	0	2	0	2	2	2	0	2	0	2	2	2	2	0	0
6A_574538650	2	0	0	2	2	2	2	0	2	2	0	0	2	0	0	0	2	0	2	0	0	2	0	2	0	0	2	2	0	2	2	0	0	0	0	2	0	2	2	2	0	2	0	2	2	2	2	0	0
6A_572410859	2	0	0	2	2	2	2	0	2	2	0	0	0	0	0	0	2	0	2	0	0	2	0	2	0	2	2	2	0	2	2	0	0	0	0	2	0	2	2	2	0	2	0	2	2	2	2	0	0
6A_571821608	2	0	0	2	2	2	2	0	2	2	0	0	0	0	0	0	2	0	2	0	0	2	0	2	0	2	2	2	0	2	2	0	0	-1	0	2	0	2	2	2	0	2	0	2	2	2	2	0	0
6A_524770115	2	-1	0	2	2	2	2	2	2	-1	0	0	0	0	0	0	2	0	2	0	0	2	0	-1	2	2	2	2	0	2	2	0	0	0	0	2	0	2	2	-1	0	2	-1	2	2	2	2	0	-1
6A_522523181	2	0	0	2	2	2	2	2	2	2	0	0	0	0	0	0	2	0	2	0	0	2	0	2	2	2	2	2	0	2	2	0	0	0	0	2	0	2	2	2	0	2	0	2	2	2	2	0	2
6A_498242938	2	0	0	2	2	2	2	2	2	2	0	0	0	0	0	0	2	0	2	0	0	2	0	2	2	2	2	2	0	2	2	0	0	0	0	2	0	2	2	2	0	2	0	2	2	2	2	0	2
6A_494196964	2	0	0	2	2	2	2	2	2	2	0	0	0	0	0	0	2	0	2	0	0	2	0	2	2	2	2	2	0	2	2	0	0	0	0	2	0	2	2	2	0	2	0	2	2	2	2	0	2
6A_476645080	2	0	0	2	2	2	2	2	2	2	0	0	0	0	0	0	2	0	2	0	0	2	0	2	2	2	2	2	0	2	2	0	0	0	0	2	0	2	2	2	0	2	0	2	2	2	2	0	2
6A_455986879	2	0	0	2	2	2	2	2	2	2	0	0	0	0	0	0	2	0	2	0	0	2	0	2	2	2	2	2	0	2	2	0	0	0	0	2	0	2	2	2	0	2	0	2	2	2	2	0	2
6A_407352973	2	-1	0	2	2	2	2	2	0	2	0	0	0	0	0	0	-1	0	2	0	0	2	0	-1	2	2	2	2	0	2	2	0	0	0	0	2	0	2	2	2	0	2	0	2	-1	2	2	0	2
6A_406490616	2	2	0	2	2	2	2	2	0	-1	0	0	0	0	0	0	2	0	2	0	0	2	0	-1	2	2	2	2	0	2	2	0	0	-1	0	2	0	2	2	2	0	2	0	2	2	2	2	0	-1
6A_454622177	2	0	0	2	2	2	2	2	0	2	0	0	0	0	0	0	2	0	2	0	0	2	0	2	2	2	2	2	0	2	2	0	0	0	0	2	0	2	2	2	0	2	0	2	2	2	2	0	2
6A_221357900	2	0	0	2	2	2	2	2	0	2	0	0	0	0	0	0	2	0	2	0	0	2	0	2	2	0	2	2	0	2	2	0	0	0	0	2	0	2	2	2	0	2	0	2	2	2	2	0	2
6A_453547314	2	0	0	2	2	-1	-1	2	0	2	0	0	0	0	0	0	2	0	2	0	0	2	0	2	2	0	2	2	0	2	2	0	0	0	0	2	0	2	2	2	0	2	0	2	2	2	2	0	2
6A_359070473	2	-1	0	2	2	2	2	2	0	2	0	0	0	0	0	0	2	0	2	0	0	2	0	2	2	0	2	2	0	2	2	0	0	0	0	2	0	2	2	2	0	2	0	2	2	2	2	0	2
6A_350196795	2	0	0	2	2	2	2	2	0	2	0	0	0	0	0	0	2	0	2	0	0	2	0	2	2	0	2	2	0	2	2	0	0	0	0	2	0	2	2	2	0	2	0	2	2	2	2	0	2
6A_147954422	2	0	0	2	2	2	-1	2	0	2	0	0	0	0	0	0	2	0	2	0	0	2	0	2	2	0	2	2	0	2	2	0	0	0	0	2	0	2	2	2	0	2	0	2	2	2	2	0	2
6A_119948349	2	0	0	2	2	2	2	2	0	2	0	0	0	0	0	0	2	0	2	0	0	2	0	2	2	0	2	2	0	2	2	0	0	0	0	2	0	2	2	2	0	2	0	2	2	2	2	0	2
6A_113352844	2	0	0	2	2	2	2	2	0	2	0	0	0	0	0	0	2	0	2	0	0	2	0	2	2	2	2	2	0	2	2	0	0	0	0	2	0	2	2	2	0	2	0	2	2	2	2	0	2
6A_453915565	2	0	0	2	2	2	2	2	0	2	0	0	0	0	0	0	2	0	2	0	0	2	0	2	2	2	2	2	0	2	2	0	0	-1	0	2	0	2	2	2	0	2	0	2	2	2	2	0	2
6A_81237782	2	0	0	2	2	2	2	2	0	2	0	0	0	0	0	0	2	0	2	0	0	2	0	2	2	2	2	2	0	2	2	0	0	0	0	2	0	2	2	2	0	2	0	2	2	2	2	0	2
6A_97341809	2	0	0	2	2	2	2	2	0	-1	0	0	0	0	0	0	2	0	2	0	0	2	0	2	2	2	2	2	0	2	2	0	0	0	0	2	0	2	2	0	0	2	0	2	2	2	2	0	2
6A_84693688	2	0	0	2	2	2	2	2	0	2	0	0	0	0	-1	0	2	0	2	0	0	2	0	-1	2	-1	2	2	0	2	2	0	0	0	0	2	0	2	2	-1	0	2	0	2	2	-1	2	0	-1
6A_81237733	2	0	0	2	2	2	2	2	0	2	0	0	0	0	0	0	2	0	2	0	0	2	0	2	2	2	2	2	0	2	2	0	0	0	0	2	0	2	2	2	0	2	0	2	2	2	2	0	2
6A_72477007	2	0	0	2	2	2	2	2	0	2	0	0	0	0	0	0	2	0	2	0	0	2	0	2	2	2	2	2	0	2	2	0	0	0	0	2	0	2	2	2	0	2	2	2	2	2	2	0	2
6A_69374520	2	0	0	2	2	2	2	2	0	2	0	0	0	0	0	0	2	0	2	0	0	2	0	2	2	2	2	2	0	2	2	0	0	0	0	2	0	2	2	2	0	2	2	2	2	2	2	0	2
6A_67117172	2	0	0	2	2	2	2	2	0	2	0	0	0	0	0	0	2	0	2	0	0	2	0	2	2	2	2	2	0	2	2	0	0	0	0	2	0	2	2	2	0	2	2	2	2	2	2	0	2
6A_64086143	2	0	0	2	2	2	2	2	0	2	0	0	0	0	0	0	2	0	2	0	0	2	0	2	2	2	2	2	0	2	2	0	0	0	0	2	0	2	2	2	0	2	2	2	2	2	2	0	2
6A_64071530	2	0	0	2	2	2	-1	2	0	2	0	0	0	0	0	0	2	0	2	0	0	2	0	2	2	2	2	2	0	2	2	0	0	0	0	2	0	2	2	2	0	2	2	2	2	2	2	0	2
6A_61743025	2	0	0	2	2	2	0	2	0	2	0	0	0	0	0	0	2	0	2	0	0	2	0	2	2	2	2	2	0	2	2	0	0	0	0	2	0	2	2	2	0	2	2	2	2	2	2	0	2
6A_53857035	2	0	0	2	2	2	0	2	0	2	0	0	0	0	0	0	2	0	2	0	0	2	0	2	2	2	2	2	0	2	2	0	0	0	0	2	0	2	2	2	0	2	2	2	2	2	2	0	2
6A_50325204	2	2	0	2	2	2	2	2	0	2	0	0	0	0	0	0	2	0	2	0	0	2	0	2	2	2	2	2	0	2	2	0	0	0	-1	2	0	2	2	2	-1	2	2	2	2	2	2	0	2
6A_48779766	2	0	0	2	2	2	2	2	0	2	0	0	0	0	0	0	2	0	2	0	0	2	0	2	2	2	2	2	0	2	2	0	0	0	0	2	0	2	2	2	0	2	2	2	2	2	2	0	2
6A_42008503	2	0	0	2	2	2	2	2	0	2	0	0	0	0	0	0	2	0	2	0	0	2	0	2	2	2	2	2	0	2	2	2	0	0	0	2	0	2	2	2	0	2	2	2	2	2	2	0	2
6A_22200978	0	0	0	2	2	2	2	0	0	2	0	0	2	0	0	0	0	2	2	0	0	2	0	2	2	2	2	2	0	2	2	2	0	2	0	0	2	2	2	2	0	2	2	2	0	2	2	0	2
6A_19204848	0	0	0	2	2	2	2	0	0	2	0	0	2	0	0	0	0	2	2	0	0	2	0	2	2	2	2	2	0	2	2	2	0	2	0	0	2	2	2	2	0	2	2	2	0	2	2	0	2
6A_19204831	0	0	0	2	2	2	2	0	0	2	0	0	2	0	0	0	0	2	2	0	0	2	0	2	2	2	2	2	0	2	2	2	0	2	0	0	2	2	2	2	0	2	2	2	0	2	2	0	2
6A_13810483	0	0	0	2	2	2	2	0	0	2	0	0	2	2	0	0	0	0	0	0	0	2	0	2	0	0	2	2	0	2	2	2	0	2	2	0	2	2	2	2	2	2	-1	0	0	0	2	0	2
6A_10597961	0	-1	0	2	2	2	2	0	0	2	0	0	2	2	0	0	0	0	0	0	0	2	0	2	0	0	2	2	0	2	2	2	0	-1	2	0	2	2	2	2	2	2	2	0	0	0	2	0	2
6A_10598114	0	0	0	2	2	2	2	0	0	2	0	0	2	2	0	0	0	0	0	0	0	2	0	2	0	0	2	2	0	2	2	2	0	2	2	0	2	2	2	2	2	2	2	0	0	0	2	0	2
1B_687066850	0	-1	2	0	0	0	0	0	2	-1	2	2	0	2	2	0	0	0	0	0	0	0	0	0	0	2	2	2	2	0	0	2	2	2	0	0	0	2	2	-1	0	0	0	0	2	0	0	2	-1
1B_686669440	0	0	2	0	0	0	0	0	2	2	2	2	0	2	2	0	0	0	0	0	0	0	0	0	0	2	2	2	2	0	0	2	2	-1	0	0	0	2	2	0	0	0	0	0	2	0	0	2	2
1B_681551833	0	0	2	0	0	0	0	0	2	2	2	2	0	2	2	0	0	0	0	0	0	0	0	0	0	2	2	2	2	0	0	2	2	2	0	0	0	2	2	0	0	0	0	0	2	0	0	2	2
1B_680192269	0	0	2	0	0	0	0	0	2	2	2	2	0	2	2	0	0	0	0	0	0	0	0	0	0	2	2	2	2	0	0	2	2	2	0	0	0	2	2	0	0	0	0	0	2	0	0	2	2
1B_673498507	0	2	2	2	0	0	0	2	0	2	2	2	0	2	2	0	2	0	0	2	0	0	0	0	0	2	2	0	2	2	0	2	2	0	2	0	0	2	2	0	0	0	0	0	2	0	0	2	2
1B_670413693	0	2	2	2	0	2	0	2	0	2	2	2	0	2	2	0	2	0	0	2	0	0	0	0	0	2	2	0	2	2	0	2	2	0	2	0	0	2	2	0	0	0	0	0	2	0	0	2	2
1B_667933358	0	2	2	2	0	2	0	2	0	2	2	2	0	2	2	0	2	0	0	2	0	0	0	0	0	2	2	0	2	2	0	2	2	0	2	0	2	0	2	0	0	2	0	0	2	0	0	2	2
1B_655903423	2	2	2	2	2	2	0	2	0	2	0	2	0	2	2	0	2	2	0	2	2	0	0	0	0	2	2	0	0	2	0	2	2	0	2	0	2	0	2	-1	0	2	2	0	2	0	0	0	2
1B_657588358	2	2	2	2	2	2	-1	2	0	2	0	2	0	2	2	0	2	2	0	2	2	0	0	-1	0	2	2	0	0	2	0	2	2	0	2	0	2	0	2	-1	0	2	2	0	2	0	0	0	2
1B_657342059	2	2	2	2	2	2	0	2	0	2	0	2	0	2	2	0	2	2	0	2	2	0	0	0	0	2	2	0	0	2	0	2	2	0	2	0	2	0	2	0	0	2	2	0	2	0	0	0	2
1B_655756667	2	2	2	2	2	2	0	2	0	2	0	2	0	2	2	0	2	2	0	2	2	0	0	0	0	2	2	0	0	2	0	2	2	0	2	0	2	0	2	0	0	2	2	0	2	0	0	0	2
1B_654087630	2	2	2	2	2	2	0	2	0	2	0	2	0	2	2	0	2	2	0	2	2	0	0	0	0	2	2	0	0	2	0	2	2	0	2	0	2	0	2	0	0	2	2	0	2	0	0	0	2
1B_654087709	2	2	2	2	2	2	0	2	0	2	0	2	0	2	2	0	2	2	0	2	2	0	0	0	0	2	2	0	0	2	0	2	2	0	2	0	2	0	2	0	0	2	2	0	2	0	0	0	2
1B_651567097	2	2	2	2	2	2	0	2	0	2	0	2	2	2	2	0	2	2	0	2	2	0	0	0	0	2	2	0	0	2	0	2	2	0	2	0	2	0	0	0	0	2	2	0	2	0	0	0	2
1B_643455303	2	2	2	2	2	2	0	2	0	2	0	2	2	0	2	0	2	2	0	2	-1	0	0	0	0	2	2	0	0	2	2	2	2	0	2	0	2	0	0	0	0	2	2	2	2	0	2	0	2
1B_641922827	2	2	2	2	2	2	0	2	0	2	0	0	2	0	2	0	2	2	0	2	2	0	0	0	0	2	2	0	0	2	2	2	2	0	2	0	2	0	0	0	0	2	2	2	2	0	2	0	2
1B_639661344	2	2	2	2	2	2	0	2	0	2	0	0	-1	0	2	0	2	2	0	2	2	0	0	-1	0	2	2	0	0	2	2	2	2	0	2	0	2	0	0	0	0	2	2	2	2	0	2	0	-1
1B_639426799	2	2	2	2	2	2	0	2	0	2	0	0	2	0	2	0	2	2	0	2	2	0	0	0	0	2	2	0	0	2	2	2	2	0	2	0	2	0	0	0	0	2	2	2	2	0	2	0	2
1B_639034818	2	2	2	2	2	2	0	2	0	2	0	0	2	0	2	0	2	2	0	2	2	0	0	0	0	2	2	0	0	2	2	2	2	0	2	0	2	0	0	0	0	2	2	2	2	0	2	0	2
1B_639426824	2	2	2	2	2	2	0	2	0	2	0	0	2	0	2	0	2	2	0	2	2	0	0	0	0	2	2	0	0	2	2	2	2	0	2	0	2	0	0	0	0	2	2	2	2	0	2	0	2
1B_637885015	2	2	2	2	2	2	0	2	0	2	0	0	2	0	2	0	2	2	0	2	2	0	0	0	2	2	2	0	0	2	2	2	2	0	2	0	2	0	0	-1	0	2	2	2	2	0	2	0	2
1B_634987677	2	2	2	2	2	2	0	2	0	2	0	0	2	0	2	0	2	2	0	2	2	0	0	0	2	2	2	0	0	2	2	2	2	0	2	0	2	0	0	0	0	2	2	2	2	0	2	0	2
1B_637585074	2	2	2	2	2	2	0	2	0	2	0	0	2	0	2	0	2	2	0	2	2	0	0	0	2	2	2	0	0	2	2	2	2	0	2	0	2	0	0	0	0	2	2	2	2	0	2	0	2
1B_634987081	2	2	2	2	2	2	0	2	0	2	0	0	2	0	2	0	2	2	0	2	2	0	0	0	2	2	2	0	0	2	2	2	2	0	2	0	2	0	0	0	0	2	2	2	2	0	2	0	2
1B_630923093	2	2	2	2	2	2	0	2	0	0	0	0	2	0	2	0	2	2	0	2	2	0	0	0	2	2	2	0	0	2	2	2	0	0	2	0	2	0	0	0	0	2	2	2	2	0	2	0	0
1B_629968170	2	2	2	2	2	2	0	2	0	0	0	0	2	0	2	0	2	2	0	2	2	0	0	0	2	2	2	0	0	2	2	2	0	0	2	0	2	0	0	0	0	2	2	2	2	0	2	0	0
1B_630246661	2	2	2	2	2	2	-1	2	0	0	0	0	2	0	2	0	2	2	0	2	2	0	0	0	2	2	2	0	0	2	2	2	0	0	2	0	2	0	0	0	0	2	2	2	2	0	2	0	0
1B_627919716	2	2	2	2	2	2	0	2	0	0	0	0	2	0	2	0	2	2	0	2	2	0	0	0	2	2	2	0	0	2	2	2	0	0	2	0	2	0	0	0	0	2	2	2	2	0	2	0	0
1B_623303336	2	2	2	2	2	2	0	2	0	0	0	0	2	0	2	0	2	2	0	2	2	0	0	0	2	2	2	2	0	2	2	0	0	0	2	0	2	0	0	0	0	2	2	2	2	0	2	0	0
1B_616595045	2	2	2	2	2	0	0	2	0	0	0	0	2	0	2	0	2	2	0	2	2	0	0	0	2	0	2	2	0	2	2	0	0	0	2	0	2	0	0	0	0	2	2	2	2	0	2	0	0
1B_622630243	2	2	2	2	2	0	0	2	0	0	0	0	2	0	0	0	2	2	0	0	2	0	0	0	2	0	0	2	0	0	0	0	0	0	2	0	2	0	0	0	0	2	2	0	2	0	0	0	0
1B_619666061	2	2	2	2	2	0	0	2	0	0	0	0	2	0	0	0	2	2	0	0	2	0	0	0	2	0	0	2	0	2	0	0	0	0	2	0	2	0	0	0	0	2	2	0	2	0	0	0	0
1B_588486198	2	0	2	2	2	0	0	2	0	0	0	0	2	0	2	0	2	2	0	0	2	0	0	2	2	2	2	2	2	2	2	0	0	0	2	2	2	2	0	0	0	2	2	2	2	0	2	0	0
1B_588006097	2	0	2	2	2	0	0	2	0	0	0	0	2	0	2	0	2	2	0	0	2	0	0	2	2	2	2	2	2	2	2	0	0	0	2	2	2	2	0	0	0	2	2	2	2	0	2	0	0
1B_587024637	2	0	2	2	2	0	0	2	0	0	0	0	2	0	2	0	2	2	0	0	2	0	0	2	2	2	2	2	2	2	2	2	0	0	2	2	2	2	0	0	0	2	2	2	2	0	2	0	0
1B_586291983	2	0	2	2	2	0	0	2	0	0	0	0	2	0	2	0	2	2	0	0	2	0	0	2	2	0	2	2	2	2	2	2	0	0	2	2	2	2	0	0	0	2	2	2	2	0	2	0	0
1B_585873683	2	-1	2	2	2	0	-1	2	0	-1	0	0	2	0	2	0	2	2	0	0	2	0	0	2	2	0	2	2	2	2	2	2	0	0	2	2	-1	2	0	2	-1	2	2	2	2	0	2	0	-1
1B_585873674	2	-1	2	2	2	0	-1	2	0	-1	0	0	2	0	2	0	2	2	0	0	2	0	0	2	2	0	2	2	2	2	2	2	0	0	2	2	-1	2	0	2	-1	2	2	2	2	0	2	0	-1
1B_581188820	2	0	2	2	2	0	0	0	0	0	0	0	2	0	2	0	2	2	0	0	2	0	0	2	2	0	2	2	2	2	2	2	0	0	2	2	2	2	0	0	0	2	2	2	2	0	2	0	0
1B_574395750	2	0	2	2	2	0	0	0	0	0	0	0	2	0	2	0	2	2	0	0	2	0	0	2	2	0	2	2	2	2	2	2	0	0	2	2	2	2	0	0	0	2	2	2	2	0	2	0	0
1B_574373589	2	0	2	2	2	0	0	0	0	0	0	0	2	0	2	0	2	2	0	0	2	0	0	2	2	2	2	2	2	2	2	2	0	0	2	2	2	2	0	0	0	2	2	2	2	0	2	0	0
1B_580582484	2	0	2	2	2	0	0	0	0	0	0	0	2	0	2	0	2	2	0	0	2	0	0	2	2	2	2	2	2	2	2	2	0	0	2	2	2	2	0	0	0	2	2	2	2	0	2	0	0
1B_571715474	2	0	2	2	2	0	0	0	0	0	0	0	2	0	2	0	2	2	2	0	2	0	0	2	2	2	2	2	2	2	2	2	0	0	2	2	2	2	0	0	0	2	2	2	2	0	2	0	0
1B_564785896	2	0	2	2	2	0	0	0	0	0	0	0	2	0	2	0	2	2	2	0	2	0	0	2	2	2	2	2	2	2	2	2	0	0	2	2	2	2	0	0	0	2	2	2	2	0	2	0	0
1B_565694187	-1	0	2	2	2	0	0	0	0	0	0	0	-1	0	-1	0	2	2	2	0	2	0	0	-1	2	2	2	2	2	2	-1	2	0	0	-1	-1	2	-1	0	-1	0	2	2	-1	2	0	2	0	0
1B_564852900	2	0	2	2	2	0	0	0	0	0	0	0	2	0	2	0	2	2	2	0	2	0	0	2	2	2	2	2	2	2	2	2	0	0	2	2	2	2	0	0	0	2	2	2	2	0	2	0	0
1B_551118080	2	0	2	2	2	0	0	0	0	0	0	0	2	0	2	0	2	2	2	0	2	0	0	2	2	0	2	2	2	2	2	2	0	0	2	2	2	2	0	0	0	2	2	2	2	0	2	0	0
1B_554584319	2	0	2	2	2	0	0	0	0	0	0	0	2	0	2	0	2	2	2	0	2	0	0	2	2	0	2	2	2	2	2	2	0	0	2	2	2	2	0	0	0	2	2	2	2	0	2	0	0
1B_549782754	2	0	2	2	2	0	0	0	0	0	0	0	2	0	2	0	2	2	2	0	2	0	0	2	2	0	2	2	2	2	2	2	0	0	2	2	2	2	0	0	0	2	2	2	2	0	2	0	0
1B_549782502	2	0	2	2	2	0	0	0	0	-1	0	0	-1	0	-1	0	2	-1	2	0	2	0	0	-1	2	0	2	-1	2	2	2	2	0	-1	2	2	2	2	0	-1	0	2	2	-1	2	0	2	0	-1
1B_545081695	2	0	2	2	2	0	0	0	0	0	0	0	2	0	2	0	2	2	2	0	2	0	0	2	2	0	2	2	2	2	2	2	0	0	2	2	2	2	0	0	0	2	2	2	2	0	2	0	0
1B_530065117	2	0	0	2	2	0	0	0	0	0	0	0	2	0	2	0	2	2	2	0	2	0	0	2	2	0	2	2	2	2	2	2	0	0	2	2	2	2	0	0	0	2	2	2	2	0	2	0	0
1B_516716328	2	0	0	2	2	0	0	0	0	0	0	0	2	0	2	0	2	2	2	0	2	0	0	2	2	0	2	2	2	2	2	2	0	0	2	2	2	2	0	0	0	2	2	2	2	0	2	0	0
1B_520882970	2	0	0	2	2	0	0	0	0	0	0	0	2	0	2	0	2	2	2	0	2	0	0	2	2	0	2	2	2	2	2	2	0	0	2	2	2	2	0	0	0	2	2	2	2	0	2	0	0
1B_520882694	-1	-1	0	2	2	0	0	0	0	0	0	0	2	0	2	0	2	2	2	0	2	0	0	-1	2	2	2	-1	2	2	2	2	0	0	2	2	2	2	0	-1	0	2	2	2	2	0	2	0	-1
1B_511752028	2	0	0	2	2	0	0	0	0	0	0	0	2	0	2	0	2	2	2	0	2	0	0	2	2	2	2	2	2	2	2	2	0	0	2	2	2	2	0	0	0	2	2	2	2	0	2	0	0
1B_483268839	2	0	0	2	2	0	-1	0	0	-1	0	0	2	0	2	0	2	2	2	0	2	0	0	2	2	2	2	2	2	2	2	2	0	0	2	2	2	2	0	0	0	2	2	2	2	0	2	0	0
1B_483268983	2	0	0	2	2	0	0	0	0	0	0	0	2	0	2	0	2	2	2	0	2	0	0	2	2	2	2	2	2	2	2	2	0	0	2	2	2	2	0	0	0	2	2	2	2	0	2	0	0
1B_484429338	2	0	0	2	2	0	0	0	0	0	0	0	2	0	2	0	2	2	2	0	2	0	0	-1	2	2	2	2	2	2	2	2	0	0	2	2	2	2	0	0	0	2	2	2	2	0	2	0	0
1B_470685944	2	0	0	2	2	0	0	0	0	0	0	0	2	0	2	0	2	2	2	0	2	0	0	2	2	2	2	2	2	2	2	2	0	0	2	2	2	2	0	0	0	2	2	2	2	0	2	0	0
1B_465963804	2	0	0	2	2	0	0	0	0	0	0	0	2	0	2	0	2	2	2	0	2	0	0	2	2	2	2	2	2	2	2	2	0	0	2	2	2	2	0	0	0	2	2	2	2	0	2	0	0
1B_443558223	2	0	0	2	2	0	0	0	0	0	0	0	2	0	2	0	2	2	2	0	2	0	0	2	2	2	2	2	2	2	2	2	0	0	2	2	2	2	0	0	0	2	2	2	2	0	2	0	0
1B_453204556	2	0	0	2	2	0	0	0	0	0	0	0	2	0	2	0	2	2	2	0	2	0	0	2	2	2	2	2	2	2	2	2	0	0	2	2	2	2	0	0	0	2	2	2	2	0	2	0	0
1B_454990828	2	0	0	2	2	0	0	0	0	0	0	0	2	0	2	0	2	2	2	0	2	0	0	2	2	2	2	2	2	2	2	2	0	0	2	2	2	2	0	0	0	2	2	2	2	0	2	0	0
1B_433954975	2	0	0	2	2	0	0	0	0	0	0	0	2	0	2	0	2	2	2	0	2	0	0	2	2	2	2	2	2	2	2	2	0	0	2	2	2	2	0	0	0	2	2	2	2	0	2	0	0
1B_409593710	2	0	0	2	2	0	0	0	0	0	0	0	2	0	2	0	2	2	2	0	2	0	0	2	2	2	2	2	2	2	2	2	0	0	2	2	2	2	0	0	0	2	2	2	2	0	2	0	0
1B_389569091	2	0	0	2	2	0	0	0	0	0	0	0	2	0	2	0	2	2	2	0	2	0	0	2	2	2	2	2	2	2	2	2	0	0	2	2	2	2	0	0	0	2	2	2	2	0	2	0	0
1B_408452587	2	-1	0	-1	2	0	0	-1	0	-1	0	0	2	0	2	0	2	2	2	0	2	0	0	-1	2	2	2	2	2	2	2	2	0	0	2	2	2	2	0	-1	0	2	2	2	2	0	2	0	-1
1B_378500287	2	0	0	2	2	0	0	0	0	-1	0	0	2	0	2	0	2	2	2	0	2	0	0	2	2	2	2	2	2	2	2	2	0	0	2	2	2	2	0	-1	0	2	2	2	2	0	2	0	-1
1B_366286021	2	0	0	2	2	0	0	0	0	0	0	0	2	0	2	0	2	2	2	0	2	0	0	2	2	2	2	2	2	2	2	2	0	0	2	2	2	2	0	0	0	2	2	2	2	0	2	0	0
1B_343365461	2	0	0	2	2	0	0	0	0	0	0	0	2	0	2	0	2	2	2	0	2	0	0	2	2	2	2	2	2	2	2	2	0	0	2	2	2	2	0	0	0	2	2	2	2	0	2	0	0
1B_328976873	2	0	0	2	2	0	0	0	0	0	0	0	2	0	2	0	2	2	2	0	2	0	0	2	2	2	2	2	2	2	2	2	0	0	2	2	2	2	0	0	0	2	2	2	2	0	2	0	0
1B_327602636	2	0	0	2	2	0	0	0	0	-1	0	0	2	0	2	0	2	2	2	0	2	0	0	-1	2	2	2	2	2	2	2	2	0	0	2	2	2	2	0	0	0	2	2	-1	2	0	2	0	-1
1B_20593321	2	0	0	2	2	0	0	0	0	0	0	0	2	0	2	0	2	2	2	0	2	0	0	2	2	0	2	2	2	2	2	2	0	0	2	2	2	2	0	0	0	2	2	2	2	0	2	0	0
1B_240269117	2	0	0	2	2	0	0	0	0	0	0	0	2	0	2	0	2	2	2	0	2	0	0	2	2	2	2	2	2	2	2	2	0	0	2	2	2	2	0	0	0	2	2	2	2	0	2	0	0
1B_292410034	2	0	0	2	2	0	0	0	0	0	0	0	2	0	2	0	2	2	2	0	2	0	0	2	2	2	2	2	2	2	2	2	0	0	2	2	2	2	0	0	0	2	2	2	2	0	2	0	0
1B_294666850	2	0	0	2	2	0	0	0	0	0	0	0	2	0	2	0	2	2	2	0	2	0	0	2	2	2	2	2	2	2	2	2	0	0	2	2	2	2	0	0	0	2	2	2	2	0	2	0	0
1B_317359710	-1	0	0	2	2	0	0	0	0	-1	0	0	2	0	2	0	2	2	2	0	2	0	0	-1	2	2	2	2	2	2	-1	2	0	-1	2	2	2	2	0	-1	0	2	2	2	2	0	2	0	-1
1B_47606469	2	0	0	2	2	0	0	0	0	0	0	0	2	0	2	0	2	2	2	0	2	0	0	2	2	2	2	2	2	2	2	2	0	0	2	2	2	2	0	0	0	2	2	2	2	0	2	0	0
1B_5137701	2	2	-1	2	2	0	0	0	0	-1	0	0	2	0	2	0	2	2	2	0	2	0	0	2	2	2	2	2	2	2	2	2	0	0	2	2	2	2	0	-1	0	2	2	2	2	0	2	0	-1
5A_691403742	0	0	0	0	0	0	0	2	0	2	0	0	0	0	0	0	0	2	2	2	0	0	2	-1	0	2	2	0	2	0	2	2	0	0	0	2	0	0	0	0	0	0	2	0	2	0	2	0	0
5A_691403779	0	0	0	0	0	0	0	2	0	2	0	0	0	0	0	0	0	2	2	2	0	0	2	2	0	2	2	0	2	0	2	2	0	0	0	2	0	0	0	0	0	0	2	0	2	0	2	0	0
5A_701575389	0	2	0	0	0	0	0	2	0	2	0	0	0	0	0	0	0	2	2	2	0	0	2	2	0	2	2	0	2	0	2	2	0	0	0	2	0	0	0	0	0	0	2	0	2	0	2	0	0
5A_694586494	0	2	0	0	0	0	0	2	0	2	0	0	0	0	0	0	0	2	2	2	0	0	2	2	0	2	2	0	2	0	2	2	0	0	0	2	0	0	0	0	0	0	2	0	2	0	2	0	0
5A_694500192	0	2	0	0	0	0	0	2	0	2	0	0	0	0	0	0	0	2	2	2	0	0	2	2	0	2	2	0	2	0	2	2	0	0	0	2	0	0	0	0	0	0	2	0	2	0	2	0	0
5A_690613933	0	0	0	0	0	0	0	2	0	2	0	0	0	0	0	0	0	2	2	2	0	0	2	2	0	2	2	0	2	0	2	2	0	0	0	2	0	0	0	0	0	0	2	0	2	0	2	0	0
5A_689881440	0	0	0	0	0	0	0	2	0	2	0	0	0	0	0	0	0	2	2	2	0	0	2	2	0	2	2	0	2	0	2	2	0	0	0	2	0	0	0	0	0	0	2	0	2	0	2	0	0
5A_684699297	0	0	0	0	0	0	0	2	0	2	2	0	0	0	0	0	0	2	2	0	0	0	2	2	0	2	0	0	2	2	2	2	0	0	0	2	0	0	0	0	0	0	2	0	2	0	2	2	0
5A_681464331	0	0	0	0	0	0	0	2	0	2	2	0	0	0	0	0	0	2	2	0	0	0	2	2	0	2	0	0	2	2	2	2	0	0	0	2	0	0	0	0	0	0	2	0	2	0	2	2	0
5A_682703894	0	0	0	0	0	0	0	2	0	2	2	0	0	0	0	0	0	2	2	0	0	0	2	2	0	2	0	0	2	2	2	2	0	0	0	2	0	0	0	0	0	0	2	0	2	0	2	2	0
5A_677674263	2	0	0	2	0	0	0	2	0	2	2	0	0	0	0	2	0	2	2	0	0	2	2	2	0	2	0	2	2	2	2	2	0	0	0	2	0	0	0	0	0	0	2	0	2	0	2	2	0
5A_671488533	2	0	0	2	0	0	0	2	0	0	2	2	0	0	0	2	0	2	2	0	0	2	2	2	2	2	0	2	0	2	2	2	0	2	0	2	2	0	0	0	0	0	2	0	2	0	2	2	0
5A_667964439	2	0	0	2	2	0	0	2	0	0	2	2	0	0	0	2	0	2	2	0	0	2	2	2	2	2	0	2	0	2	2	2	2	2	0	2	2	0	0	0	0	2	2	0	2	0	2	2	0
5A_669768238	2	0	0	2	2	0	0	2	0	0	2	2	0	0	0	2	0	2	2	0	0	2	2	2	2	2	0	2	0	2	2	2	2	0	0	2	2	0	0	0	0	2	2	0	2	0	2	2	0
5A_666212352	2	0	0	2	2	0	0	2	0	0	2	2	0	0	0	2	0	2	2	0	0	2	2	2	2	2	0	2	0	2	2	2	2	2	0	2	2	0	0	0	0	2	2	0	2	0	2	2	0
5A_645253609	2	0	0	2	2	0	0	2	2	0	0	2	0	0	2	2	0	2	2	0	0	2	0	2	2	2	0	2	0	2	0	2	2	0	0	2	2	0	0	0	0	2	2	0	2	0	0	2	0
5A_636697253	2	0	0	2	2	0	0	2	2	0	0	2	0	0	2	2	0	2	2	0	0	0	2	2	2	2	0	2	0	2	0	2	2	2	0	2	2	0	0	0	0	2	2	0	2	0	0	2	0
5A_613546850	2	0	0	2	2	0	0	2	2	0	0	0	0	0	0	2	0	2	2	0	2	0	2	2	2	2	0	2	0	2	2	2	2	2	0	2	2	0	0	0	0	2	2	0	2	0	2	2	0
5A_595899957	2	2	0	2	2	0	0	0	2	0	0	0	0	2	0	2	0	2	2	0	2	0	0	2	2	2	2	0	0	2	0	2	2	0	0	2	2	0	0	0	0	2	2	0	2	0	0	2	2
5A_593238517	2	2	0	2	2	0	0	0	2	0	0	0	0	2	0	2	0	2	2	0	2	0	2	2	2	2	2	0	0	2	2	2	2	2	0	2	2	0	0	0	0	2	2	0	2	0	2	2	2
5A_591302327	2	2	0	2	2	0	0	0	2	0	0	0	0	2	0	2	0	2	2	0	2	0	2	2	2	2	2	0	0	2	2	2	2	2	0	2	2	0	0	0	0	2	2	0	2	0	2	2	2
5A_580532427	2	2	0	0	2	2	0	0	2	2	0	0	0	2	2	0	0	2	2	2	2	0	2	2	2	2	2	0	0	2	2	2	2	2	0	2	2	0	0	2	0	2	2	0	2	0	2	0	2
5A_579842013	2	2	0	0	2	2	0	0	2	2	0	0	0	2	2	0	0	2	2	2	2	0	2	2	2	2	2	0	0	2	2	2	2	2	0	2	2	0	0	2	0	2	2	0	2	0	2	0	2
5A_581934034	2	2	0	2	2	2	0	0	2	2	0	0	0	2	2	0	0	2	2	2	2	0	2	2	2	2	2	0	0	2	2	2	2	2	0	2	2	0	0	2	0	2	2	0	2	0	2	0	2
5A_583535692	2	2	0	2	2	2	0	0	2	2	0	0	0	2	2	0	0	2	2	2	2	0	2	2	2	2	2	0	0	2	2	2	2	2	0	2	2	0	0	2	0	2	2	0	2	0	2	0	2
5A_575522049	2	2	0	0	2	2	0	0	2	2	0	0	0	2	2	0	0	2	2	2	2	0	2	2	2	2	2	0	0	2	2	2	2	2	0	2	2	0	0	-1	0	2	2	0	2	0	2	0	2
5A_572980094	2	2	0	0	2	2	0	0	0	2	0	0	-1	2	2	0	0	2	2	2	2	0	2	2	2	2	2	-1	0	2	2	2	2	-1	0	2	0	0	0	-1	0	2	2	2	2	0	2	0	-1
5A_572980260	2	2	0	0	2	2	0	0	0	2	0	0	0	2	2	0	0	2	2	2	2	0	2	2	2	2	2	0	0	2	2	2	2	2	0	2	0	0	0	2	0	2	2	2	2	0	2	0	2
5A_572006166	2	2	2	0	2	2	0	0	0	2	0	0	0	2	2	0	0	2	2	2	2	0	2	2	2	2	2	0	0	2	2	2	2	2	0	2	0	0	0	2	0	2	2	2	2	0	2	0	2
5A_572006336	2	2	2	0	2	2	0	0	0	-1	0	0	0	2	2	0	0	2	2	2	2	0	2	2	2	2	2	-1	0	2	2	2	2	2	0	2	0	0	0	-1	0	2	2	2	2	0	2	0	2
5A_568561724	2	2	2	0	2	2	0	0	0	2	0	0	0	2	2	0	0	2	2	2	2	0	2	2	2	2	2	0	0	2	2	2	2	2	0	2	0	0	0	2	2	2	2	2	2	0	2	0	2
5A_568561684	2	2	2	0	2	2	0	0	0	2	0	0	0	2	2	0	0	2	2	2	2	0	2	2	2	2	2	0	0	2	2	2	2	2	0	2	0	0	0	2	2	2	2	2	2	0	2	0	2
5A_561264965	2	2	2	0	2	2	0	0	0	2	0	0	0	2	2	0	0	2	2	2	2	0	0	2	2	2	2	0	2	0	2	2	2	2	0	2	0	2	0	2	2	2	2	2	2	0	2	0	2
5A_558969437	2	2	2	0	2	2	0	0	0	2	0	0	0	2	2	0	0	2	2	2	2	0	0	2	2	2	2	0	2	0	2	2	2	2	0	2	0	2	0	2	2	2	2	2	2	0	2	0	2
5A_540370129	2	2	2	0	2	2	2	0	0	2	2	2	2	2	2	0	2	2	2	2	0	0	0	2	2	0	2	0	2	0	2	2	0	2	0	2	0	2	0	2	2	2	2	0	0	0	2	0	0
5A_526650670	2	2	2	0	2	2	2	0	0	2	0	2	2	2	2	0	2	2	2	2	0	0	0	2	2	0	2	0	2	0	2	2	0	2	0	2	0	2	0	2	2	2	2	0	0	0	2	0	0
5A_509242508	2	2	2	0	2	2	2	0	0	2	0	2	2	2	2	0	2	2	2	2	0	0	0	2	2	0	2	0	2	0	2	2	0	2	0	2	0	2	0	2	2	2	2	0	0	0	2	0	0
5A_502929165	2	2	2	0	2	2	2	0	0	2	0	2	2	2	2	0	2	2	2	2	0	0	0	2	2	0	2	0	2	0	2	0	0	2	0	2	0	2	0	2	2	2	2	0	0	0	2	0	0
5A_504711848	2	2	2	0	2	2	2	0	0	2	0	2	2	2	2	0	2	2	2	2	0	0	0	2	2	0	2	0	2	0	2	2	0	2	0	2	0	2	0	2	2	2	2	0	0	0	2	0	0
5A_526290573	2	2	2	0	2	2	2	0	0	2	0	2	2	2	2	0	2	2	2	2	0	0	0	2	2	2	2	0	2	0	2	2	0	2	0	2	0	2	0	2	2	2	2	0	0	0	2	0	0
5A_532377854	2	2	2	0	2	2	2	0	0	2	0	2	2	2	2	0	2	2	2	2	0	0	0	2	2	2	2	0	2	0	2	2	0	2	0	2	0	2	0	2	2	2	2	0	0	0	2	0	0
5A_526860491	2	2	2	0	2	2	-1	0	0	-1	0	2	2	2	2	0	2	2	2	2	0	0	0	-1	2	2	2	0	2	0	2	2	0	2	0	2	0	2	0	-1	2	2	2	0	0	0	2	0	-1
5A_509242256	2	2	2	0	2	2	2	0	0	2	0	2	2	2	2	0	2	2	2	2	0	0	0	-1	2	2	2	0	2	0	2	2	0	2	0	2	0	2	0	2	2	2	2	-1	-1	0	2	0	-1
5A_488017555	2	2	2	0	2	2	2	0	0	2	2	2	2	2	2	0	2	2	2	2	0	0	0	2	2	2	2	0	2	0	2	0	0	2	0	2	0	2	0	2	2	2	2	0	0	0	2	0	-1
5A_478024327	2	2	2	0	2	2	2	0	0	2	2	2	2	2	2	0	2	2	2	2	0	0	0	2	2	2	2	0	2	0	2	0	0	-1	2	2	0	2	0	2	2	2	2	0	-1	0	2	0	-1
5A_459329620	2	2	2	0	2	2	2	0	0	2	2	2	2	2	2	0	2	2	2	2	0	0	0	2	2	0	2	0	2	0	2	0	0	0	2	2	0	2	0	2	2	2	2	0	0	0	2	0	0
5A_462122669	2	2	2	0	2	0	2	0	0	2	0	2	2	2	2	0	2	2	2	0	0	0	0	2	2	0	2	0	2	0	0	0	0	0	2	2	0	2	0	2	2	2	2	0	0	0	0	0	0
5A_475518702	2	2	2	0	2	0	2	0	0	2	0	2	2	2	2	0	2	2	2	0	0	0	0	2	2	0	2	0	2	0	0	0	0	0	2	2	0	2	0	2	2	2	2	0	0	0	0	0	0
5A_467547080	2	-1	2	0	2	0	2	0	0	-1	0	2	-1	2	-1	0	2	2	2	0	-1	0	0	-1	2	0	2	-1	2	0	0	0	0	-1	2	-1	-1	2	0	-1	2	2	0	-1	0	0	0	0	-1
5A_483203366	2	2	2	0	2	0	2	0	0	2	0	2	2	2	2	0	2	2	2	0	0	0	0	2	2	2	2	0	2	0	0	0	0	0	0	2	0	2	0	2	2	2	2	0	0	0	0	0	0
5A_455140212	2	2	2	0	2	0	2	0	0	2	0	2	2	2	2	0	2	2	2	0	0	0	0	2	2	2	2	0	2	0	0	0	0	0	2	2	0	2	0	0	2	2	2	0	0	0	0	0	0
5A_454838505	2	2	2	0	2	0	-1	0	0	-1	0	2	2	2	2	0	2	-1	2	0	0	0	0	-1	2	0	2	-1	2	0	0	0	0	0	2	2	0	2	0	-1	2	2	2	0	0	0	0	0	-1
5A_445264090	2	2	2	0	2	2	2	0	0	2	2	2	2	2	2	0	2	2	2	2	0	0	0	2	2	2	2	0	2	0	2	0	0	0	2	2	0	2	0	0	2	2	2	0	0	0	2	0	0
5A_445832627	2	2	2	0	2	0	2	0	0	2	0	2	2	2	2	0	2	2	2	0	0	0	0	2	2	2	2	0	2	0	0	0	0	0	2	2	0	2	0	0	2	2	2	0	0	0	0	0	0
5A_391754125	2	2	2	2	0	0	2	0	0	2	0	2	2	2	2	0	2	2	2	0	0	0	0	2	2	2	2	0	2	0	0	0	0	0	2	2	0	2	0	0	2	2	2	0	0	0	0	0	0
5A_301148730	2	2	2	2	0	0	2	0	0	2	0	2	2	2	2	0	2	2	2	0	0	0	0	2	2	2	2	0	2	0	0	0	0	0	2	2	0	2	0	0	2	2	2	0	0	0	0	0	0
5A_246972169	2	2	2	2	0	0	2	0	0	2	0	2	2	2	2	0	2	2	2	0	0	0	0	2	2	2	2	0	2	0	0	0	0	0	2	2	0	2	0	0	2	2	2	0	0	0	0	0	0
5A_259782198	2	2	2	2	0	0	2	0	0	2	0	2	2	2	2	0	2	2	2	0	0	0	0	2	2	2	2	0	2	0	0	0	0	-1	2	2	0	2	0	0	2	2	2	0	0	0	0	0	0
5A_224545536	2	2	2	2	0	0	2	0	0	2	0	2	2	2	2	0	2	2	2	0	0	0	0	2	2	2	2	0	2	0	0	0	0	0	2	2	0	2	0	0	2	2	2	0	0	0	0	0	0
5A_304880380	2	2	2	2	0	0	2	0	0	2	0	2	2	2	2	0	2	2	2	0	0	0	0	2	2	2	2	0	2	0	0	0	0	0	2	2	0	2	0	0	2	2	2	0	0	0	0	0	0
5A_407812926	2	2	2	2	2	0	2	0	0	2	0	2	2	2	2	0	2	2	2	0	0	0	0	2	2	2	2	0	2	0	0	0	0	0	2	2	0	2	0	0	2	2	2	0	0	0	0	0	0
5A_413750980	2	2	2	2	2	0	2	0	0	2	0	2	2	2	2	0	2	2	2	0	0	0	0	2	2	2	2	0	2	0	0	0	0	0	2	2	0	2	0	0	2	2	2	0	0	0	0	0	0
5A_417544232	2	2	2	2	2	2	2	0	0	2	2	2	2	2	2	0	2	2	2	2	0	0	0	2	2	2	2	0	2	0	2	0	0	0	2	2	0	2	0	0	2	2	2	0	0	0	2	0	0
5A_421944644	-1	2	2	2	2	2	2	-1	0	-1	2	2	2	2	2	2	2	2	2	2	0	0	0	-1	2	2	2	-1	2	0	2	0	0	-1	2	2	-1	2	0	-1	2	2	2	0	0	0	2	0	-1
5A_426948590	2	2	2	2	2	2	2	0	0	2	2	2	2	2	2	0	2	2	2	2	0	0	0	-1	2	2	2	0	2	0	2	0	0	0	2	2	0	2	0	-1	2	2	2	0	0	0	2	0	0
5A_407813207	-1	2	2	2	2	2	2	0	0	-1	2	2	2	2	2	0	2	2	2	2	0	0	0	-1	2	2	2	0	2	0	2	0	0	-1	2	2	0	2	0	-1	2	2	2	0	0	0	2	0	0
5A_389157901	2	2	2	2	0	2	2	0	0	2	2	2	2	2	2	0	2	2	2	2	0	0	0	2	2	2	2	0	2	0	2	0	0	0	2	2	0	2	0	0	2	2	2	0	0	0	2	0	0
5A_395317374	2	2	2	2	0	2	2	0	0	-1	2	2	2	2	2	0	2	2	2	2	0	0	0	-1	2	2	2	0	2	0	2	0	0	0	2	2	2	2	0	-1	2	2	2	0	0	0	2	0	-1
5A_373538490	2	2	2	2	0	2	2	0	0	2	2	2	2	2	2	0	2	2	2	2	0	0	0	2	2	2	2	0	2	0	2	0	0	0	2	2	0	2	0	0	2	2	2	0	0	0	2	0	0
5A_47011756	2	2	2	2	-1	2	2	0	0	2	2	2	2	2	2	0	2	2	2	2	0	-1	0	-1	2	2	2	0	2	0	2	0	0	0	2	2	-1	2	0	-1	2	2	2	-1	-1	0	2	0	-1
5A_47011890	2	2	2	2	0	2	2	0	0	2	2	2	2	2	2	0	2	2	2	2	0	0	0	-1	2	2	2	0	2	0	2	0	0	0	2	2	0	2	0	0	2	2	2	0	0	0	2	0	0
5A_47652818	2	2	2	2	0	2	2	0	0	2	2	2	2	2	2	0	2	2	2	2	0	0	0	2	2	2	2	0	2	0	2	0	0	0	2	2	0	2	0	0	2	2	2	0	0	0	2	0	0
5A_47016091	2	2	2	2	0	2	2	0	0	-1	2	2	2	2	2	0	2	2	2	2	0	0	0	-1	2	2	2	0	2	0	2	0	0	-1	2	2	0	2	0	0	2	2	2	0	0	0	2	0	0
5A_47011774	2	2	2	2	-1	2	2	0	0	2	2	2	2	2	2	0	2	2	2	2	0	0	0	-1	2	2	2	0	2	0	2	0	0	0	2	2	-1	2	0	-1	2	2	2	0	0	0	2	0	-1
5A_47063061	2	2	2	2	0	2	2	0	0	2	2	2	2	2	2	0	2	2	2	2	0	0	0	2	2	2	2	0	2	0	2	0	0	-1	2	2	0	2	0	0	2	2	2	0	-1	0	2	0	2
5A_47063111	2	2	2	2	0	2	2	0	0	2	2	2	2	2	2	0	2	2	2	2	0	0	0	2	2	2	2	0	2	0	2	0	0	-1	2	2	0	2	0	0	2	2	2	0	-1	0	2	0	2
5A_47063000	2	2	2	2	-1	2	2	2	0	2	2	2	2	2	2	0	2	2	2	2	0	0	0	-1	2	2	2	0	2	0	2	0	0	0	2	2	0	2	0	-1	2	2	2	0	-1	-1	2	0	2
5A_47062981	2	2	2	2	0	2	2	2	0	2	2	2	2	2	2	0	2	2	2	2	0	0	0	-1	2	2	2	2	2	0	2	0	0	0	2	2	0	2	0	-1	2	2	2	0	-1	-1	2	0	2
5A_47063003	2	2	2	2	-1	2	2	2	0	2	2	2	2	2	2	0	2	2	2	2	0	0	0	-1	2	2	2	0	2	0	2	0	0	0	2	2	0	2	0	-1	2	2	2	0	-1	-1	2	0	2
5A_47016079	2	2	2	2	0	2	2	0	0	-1	2	2	2	2	2	0	2	2	2	2	0	0	0	-1	2	2	2	0	2	0	2	0	0	-1	2	2	0	2	0	0	2	2	2	0	0	0	2	0	0
5A_37760490	2	2	2	2	0	2	2	0	0	2	2	2	2	2	2	0	2	2	2	2	0	0	0	2	0	2	2	0	2	2	2	0	0	0	2	2	0	2	2	0	2	2	2	2	0	0	2	0	0
5A_15723613	2	2	2	2	0	2	2	0	0	2	0	2	0	2	2	2	2	2	2	2	0	0	0	2	0	2	2	0	2	2	2	0	0	2	2	2	0	0	2	2	2	2	2	2	0	0	2	0	0
5A_18501529	2	2	2	2	0	2	2	0	0	2	0	2	0	2	2	2	2	2	2	2	0	0	0	2	0	2	2	0	2	2	2	0	0	0	2	2	0	2	2	2	2	2	2	2	0	0	2	0	0
5A_18679727	-1	2	2	2	0	2	2	0	0	2	0	2	0	2	2	2	2	2	2	2	0	0	0	2	0	0	2	0	2	2	2	0	0	0	2	2	-1	2	2	-1	2	2	2	2	0	0	2	0	0
5A_19238887	2	2	2	2	0	2	2	0	0	2	0	2	0	2	2	2	2	2	2	2	0	0	0	2	0	0	2	0	2	2	2	0	0	0	2	2	0	2	2	2	2	2	2	2	0	0	2	0	0
5A_19238938	2	2	2	2	0	2	2	0	0	2	0	2	0	2	2	2	2	2	2	2	0	0	0	2	0	0	2	0	2	2	2	0	0	0	2	2	0	2	2	2	2	2	2	2	0	0	2	0	0
5A_20398976	2	2	2	2	0	0	2	0	0	2	0	2	0	2	2	2	2	2	2	0	0	0	0	2	0	0	2	0	2	2	0	0	0	0	2	2	0	2	0	2	2	2	2	2	0	0	0	0	0
5A_20398919	2	2	2	2	0	0	2	0	0	2	0	2	0	2	2	2	2	2	2	0	0	0	0	2	0	0	2	0	2	2	0	0	0	0	2	2	0	2	0	2	2	2	2	2	0	0	0	0	0
5A_28654583	2	2	2	2	0	0	2	0	0	2	0	2	0	2	2	2	2	2	2	0	0	0	0	2	0	2	2	0	2	2	0	0	0	0	2	2	0	2	0	2	2	2	2	2	0	0	0	0	0
5A_28654477	2	2	2	2	0	0	2	0	0	2	0	2	0	2	2	2	2	2	2	0	0	0	0	2	0	2	2	0	2	2	0	0	0	0	2	2	0	2	0	2	2	2	2	2	0	0	0	0	0
5A_15723623	2	2	2	2	0	0	2	0	0	2	0	2	0	2	2	2	2	2	2	0	0	0	0	2	0	0	2	0	2	2	0	0	0	0	2	2	0	0	0	2	2	2	2	2	0	0	0	0	0
5A_9607213	2	2	2	2	0	0	2	0	2	0	0	2	0	0	2	2	2	2	2	0	2	0	0	2	0	0	2	0	2	2	0	0	0	0	2	2	0	0	0	2	2	2	2	2	0	0	0	0	0
5A_9510725	2	2	2	2	0	0	2	0	2	0	0	2	0	0	2	2	2	2	2	0	2	0	0	2	0	2	2	0	2	2	0	0	0	0	2	2	0	0	0	2	2	2	2	2	0	0	0	0	0
5A_6198035	2	2	2	2	0	0	0	0	2	0	0	2	2	0	2	2	2	0	2	0	2	0	0	2	0	0	2	2	2	2	0	2	2	0	2	2	0	0	0	2	2	2	-1	2	0	0	0	0	0
1A_586122947	0	0	0	2	0	2	2	2	0	0	0	2	0	0	0	2	2	2	2	0	2	0	2	0	0	2	2	0	0	0	2	2	0	0	2	2	2	0	0	2	0	2	2	0	0	0	2	2	0
1A_585679974	0	0	0	2	0	2	2	2	0	0	0	2	0	0	0	2	2	2	2	0	2	0	2	0	0	2	2	0	0	0	0	2	0	-1	2	2	2	0	0	2	0	2	2	0	0	0	0	2	0
1A_584712525	0	0	0	2	0	2	2	2	0	0	0	2	0	0	0	2	2	2	2	0	2	0	2	0	0	2	2	0	0	0	0	2	0	0	2	2	2	0	0	-1	0	2	2	0	0	0	0	2	0
1A_584712578	0	0	0	2	0	2	2	2	0	0	0	2	0	0	0	2	2	2	2	0	2	0	2	0	0	2	2	0	0	0	0	2	0	0	2	2	2	0	0	-1	0	2	2	0	0	0	0	2	0
1A_584712501	0	0	0	2	0	2	2	2	0	0	0	2	0	0	0	2	2	2	2	0	2	0	2	0	0	2	2	0	0	0	0	2	0	0	2	2	2	0	0	-1	0	2	2	0	0	0	0	2	0
1A_582873151	0	0	0	2	0	2	2	2	0	0	0	2	0	0	0	2	2	2	2	0	2	0	2	2	0	2	2	0	0	0	0	2	0	0	0	2	2	0	0	2	0	2	2	0	0	0	0	2	0
1A_581265405	0	0	0	2	0	2	2	2	0	0	2	2	0	0	0	2	2	2	2	0	2	0	2	2	0	2	2	0	0	0	0	2	0	0	0	2	2	0	0	2	0	2	2	0	0	0	0	2	0
1A_581255854	0	0	0	2	0	2	2	2	0	0	2	2	0	0	0	2	2	2	2	0	2	0	2	2	0	0	2	0	0	0	0	2	0	0	0	2	2	0	0	2	0	2	2	0	0	0	0	2	0
1A_579966194	0	0	0	2	0	2	2	2	0	0	2	2	0	0	0	2	2	2	2	0	2	0	2	2	0	2	2	0	0	0	0	2	0	0	0	2	2	0	0	2	0	2	2	0	0	0	0	2	0
1A_579171494	0	0	0	2	0	2	2	2	0	0	2	2	0	0	0	2	2	2	2	0	2	0	2	2	0	2	2	0	0	0	0	2	0	0	0	2	2	0	0	2	0	2	2	0	0	0	0	2	0
1A_576136507	0	0	0	0	0	2	0	2	0	0	2	0	0	0	0	2	0	2	2	0	2	0	2	2	0	0	2	0	0	0	0	2	0	0	0	2	2	0	0	2	2	2	2	0	0	0	0	2	2
1A_567713956	0	-1	0	0	0	2	0	2	0	-1	2	0	0	0	0	2	0	2	2	0	2	0	2	-1	0	0	2	0	0	0	0	2	0	0	0	2	2	0	0	-1	2	2	2	0	0	0	0	2	2
1A_551310120	0	0	0	0	0	2	0	2	0	0	2	0	0	0	0	2	0	2	2	0	2	0	2	2	0	0	2	0	0	0	0	2	0	0	0	2	2	0	0	2	2	2	2	0	0	0	0	2	2
1A_552091823	0	0	0	0	0	2	0	2	0	0	2	0	0	0	0	2	0	2	2	0	2	0	2	2	0	0	2	0	0	0	0	2	0	0	0	2	2	0	0	2	2	2	2	0	0	0	0	2	2
1A_568327756	0	0	0	0	0	2	0	2	0	0	2	0	0	0	0	2	0	2	2	0	2	0	2	2	0	0	2	0	0	0	0	2	0	0	0	2	2	0	0	2	2	2	2	0	0	0	0	2	2
1A_547606324	0	-1	0	0	0	2	0	2	0	0	2	0	0	0	0	2	0	2	2	0	2	0	2	2	0	2	2	0	0	0	0	2	0	0	0	2	2	0	0	2	2	2	2	0	0	0	0	2	2
1A_547606236	0	0	0	0	0	2	0	2	0	0	2	0	0	0	0	2	0	2	2	0	2	0	2	2	0	2	2	0	0	0	0	2	0	0	0	2	2	0	0	2	2	2	2	0	0	0	0	2	2
1A_565755569	0	0	0	0	0	2	0	2	0	0	2	0	0	0	0	2	0	2	2	0	2	0	2	2	0	0	2	0	0	0	0	2	0	0	0	2	2	0	0	2	2	2	2	0	0	0	0	2	2
1A_565667171	0	0	0	0	0	2	0	2	0	0	2	0	0	0	0	2	0	2	2	0	2	0	2	-1	0	0	2	0	0	0	0	2	0	0	0	2	2	0	0	-1	2	2	2	0	0	0	0	2	2
1A_571380422	0	0	0	0	0	2	0	2	0	0	2	0	0	0	0	2	0	2	2	0	2	0	2	2	0	2	2	0	0	0	0	2	0	0	0	2	2	0	0	2	2	2	2	0	0	0	0	2	2
1A_568327754	0	0	0	0	0	2	0	2	0	0	2	0	0	0	0	2	0	2	2	0	2	0	2	2	0	2	2	0	0	0	0	2	0	0	0	2	2	0	0	2	2	2	2	0	0	0	0	2	2
1A_568198234	-1	-1	0	0	0	2	0	2	0	0	2	0	-1	0	0	2	0	2	2	0	2	0	2	2	0	2	2	0	0	0	0	2	0	0	0	2	2	0	0	2	2	2	2	0	0	0	0	2	2
1A_548750891	0	0	0	0	0	2	0	2	0	0	2	0	0	0	0	2	0	2	2	0	2	0	2	2	0	2	2	0	0	0	0	2	0	0	0	2	2	0	0	2	2	2	2	0	0	0	0	2	2
1A_557335224	0	0	0	0	0	2	0	2	0	0	2	0	0	0	0	2	0	2	2	0	2	0	2	2	0	2	2	0	0	0	0	2	0	0	0	2	2	0	0	2	2	2	2	0	0	0	0	2	2
1A_542083559	0	0	0	0	0	2	0	2	0	0	2	0	0	0	0	2	0	2	2	0	2	0	2	2	0	2	2	0	0	0	0	2	0	0	0	2	2	0	0	2	2	2	2	0	0	0	0	2	2
1A_542083617	0	2	0	0	0	2	-1	2	0	-1	2	0	0	-1	0	2	0	2	2	0	2	0	2	2	0	2	2	0	0	-1	-1	2	0	-1	0	2	2	0	0	2	2	2	2	-1	-1	0	0	2	-1
1A_542083620	0	-1	0	0	0	2	-1	2	0	-1	2	0	0	-1	-1	2	0	2	2	0	2	0	2	2	0	2	2	0	0	-1	-1	2	0	-1	0	2	2	0	0	2	2	2	2	-1	-1	2	0	2	-1
1A_539751591	0	0	0	0	0	2	0	2	0	0	2	0	0	0	0	2	0	2	2	0	2	0	2	2	0	2	2	0	0	0	2	2	0	0	0	2	2	0	0	2	2	2	2	0	0	0	2	2	2
1A_540058748	0	0	0	0	0	2	0	2	0	0	2	0	0	0	0	2	0	2	2	0	2	0	2	2	0	2	2	0	0	0	2	2	0	0	0	2	2	0	0	-1	2	2	2	0	0	0	2	2	2
1A_539751585	0	0	0	0	0	2	0	2	0	0	2	0	0	0	0	2	0	2	2	0	2	0	2	2	0	2	2	0	0	0	2	2	0	0	0	2	2	0	0	2	2	2	2	0	0	0	2	2	2
1A_535566801	0	0	0	0	0	2	0	2	0	0	2	0	0	0	0	2	0	2	2	0	2	0	2	2	0	2	2	0	0	0	2	2	0	0	0	2	2	0	0	2	2	2	-1	0	0	0	2	2	2
1A_535566765	0	0	0	0	0	2	0	2	0	0	2	0	0	0	0	2	0	2	2	0	2	0	2	2	0	2	2	0	0	0	2	2	0	0	0	2	2	0	0	2	2	2	-1	0	0	0	2	2	2
1A_535107234	0	0	0	0	0	2	0	0	0	0	2	0	0	0	0	2	0	2	2	0	2	0	2	2	0	2	2	0	0	0	2	2	0	0	0	2	0	0	0	2	2	2	2	0	0	0	2	2	2
1A_535081794	0	0	0	0	0	2	0	0	0	0	2	0	0	0	0	2	0	2	2	0	2	0	2	2	0	2	2	0	0	0	2	2	0	0	0	2	0	0	0	2	2	2	2	0	-1	0	2	2	2
1A_524154056	0	0	0	0	0	2	0	0	0	0	2	0	2	0	0	2	0	2	2	2	2	0	0	2	2	2	2	0	0	0	2	2	0	0	0	2	0	0	0	2	2	2	2	0	0	0	2	2	2
1A_521879347	0	0	0	0	0	2	2	0	0	0	2	0	2	0	0	2	0	2	2	2	2	0	0	2	2	2	2	0	0	0	2	2	0	0	0	2	0	0	0	2	2	2	2	0	0	0	2	2	2
1A_518858154	0	0	0	0	0	2	2	0	0	0	2	0	2	0	0	2	0	2	0	2	2	0	0	2	2	2	2	0	0	0	2	2	0	0	0	2	0	0	0	2	2	2	2	0	0	0	2	2	2
1A_518022581	0	-1	0	0	0	2	2	0	0	0	2	0	2	0	0	2	0	2	0	2	2	0	0	2	2	2	2	0	0	0	2	2	0	0	0	2	0	0	0	2	2	2	2	0	-1	0	2	2	2
1A_517717920	0	0	0	0	0	2	2	0	0	0	2	0	2	0	0	2	0	2	0	2	2	0	0	2	2	2	2	0	2	0	2	2	0	0	0	2	0	0	0	2	2	2	2	0	0	0	2	2	2
1A_517717925	0	0	0	0	0	2	2	0	0	0	2	0	2	0	0	2	0	2	0	2	2	0	0	2	2	2	2	0	2	0	2	2	0	0	0	2	0	0	0	2	2	2	-1	0	0	0	2	2	2
1A_516772920	0	0	0	0	0	2	2	0	0	0	2	0	2	0	0	2	0	2	0	2	2	0	0	2	2	2	2	0	2	0	2	2	0	0	0	2	0	0	0	2	2	2	2	0	0	0	2	2	2
1A_511624585	0	0	0	0	0	2	2	0	0	0	2	0	2	0	0	2	0	2	0	2	2	0	0	2	2	2	2	0	2	0	2	2	0	2	0	2	0	0	0	2	2	0	2	0	0	0	2	0	2
1A_511008876	0	0	0	0	0	2	2	0	0	0	2	0	2	0	0	2	0	2	0	2	0	0	0	2	2	2	2	0	2	0	2	2	0	2	0	2	0	0	0	2	2	0	2	0	0	0	2	0	2
1A_510672997	0	0	0	0	0	2	2	0	0	0	2	0	2	0	0	2	0	2	0	2	0	0	0	2	2	2	2	0	2	0	2	2	0	2	0	2	0	0	0	2	2	0	2	0	0	0	2	0	2
1A_510349458	0	0	0	0	0	2	2	0	0	0	2	0	2	0	0	2	0	2	0	2	0	0	0	2	2	2	2	0	2	0	2	2	0	2	0	2	0	0	0	2	2	0	2	0	0	0	2	0	2
1A_510895752	0	-1	0	0	0	2	2	0	0	-1	2	0	2	0	0	2	0	2	0	2	0	0	0	2	2	2	2	0	2	0	2	2	0	2	0	2	0	0	0	2	2	0	2	0	0	0	2	0	2
1A_508644813	0	0	0	0	0	2	2	0	0	0	2	0	2	0	0	2	0	2	0	2	0	0	0	2	2	2	2	0	2	0	2	2	0	2	0	2	0	0	0	2	2	0	2	0	0	0	2	0	2
1A_507984868	0	0	0	0	0	2	2	0	0	0	2	0	2	0	0	2	0	2	0	2	0	0	0	2	2	2	2	0	2	0	2	2	0	2	0	2	0	0	0	2	2	0	2	0	0	0	2	0	2
1A_505200011	0	0	0	0	0	2	2	0	0	0	2	0	2	0	0	2	0	2	0	2	0	0	0	2	2	2	2	0	2	0	2	2	0	2	0	2	0	0	0	2	2	0	2	0	0	0	2	0	2
1A_505200032	0	0	0	0	0	2	2	0	0	0	2	0	2	0	0	2	0	2	0	2	0	0	0	2	2	2	2	0	2	0	2	2	0	2	0	2	0	0	0	2	2	0	2	0	0	0	2	0	2
1A_507078525	0	0	0	0	0	2	2	0	0	0	2	0	2	0	0	2	0	2	0	2	0	0	0	2	2	2	2	0	2	0	2	2	0	2	0	2	0	0	0	2	2	0	2	0	0	0	2	0	2
1A_504579591	0	0	0	0	0	2	2	0	0	0	2	0	2	0	0	2	0	2	0	2	0	0	0	2	2	2	2	0	2	0	2	2	0	2	0	2	0	0	0	2	2	0	2	0	0	0	2	0	2
1A_498058332	0	0	0	0	0	2	2	0	0	0	0	0	2	0	0	2	0	2	0	2	0	0	0	2	2	2	2	0	2	0	2	2	0	2	0	2	0	0	0	2	2	0	2	2	0	0	2	0	2
1A_497210220	0	0	0	0	0	2	2	0	0	0	0	0	2	0	0	2	0	2	0	2	0	0	0	2	2	2	2	0	2	0	2	2	0	2	0	2	0	0	2	2	2	0	2	2	0	0	2	0	2
1A_480741117	0	0	0	0	0	2	2	0	0	0	0	0	2	0	0	2	0	2	0	2	0	0	0	2	2	2	2	0	2	0	2	2	0	2	0	2	0	0	2	2	2	0	2	2	0	0	2	0	2
1A_478359573	0	0	0	0	0	2	2	0	0	0	0	0	2	0	0	2	0	2	0	2	0	0	0	-1	2	2	2	0	2	0	2	2	0	2	0	2	0	0	2	2	2	0	2	2	0	0	2	0	2
1A_474637501	0	-1	0	0	0	2	2	0	0	0	0	0	2	0	0	2	0	2	0	2	0	0	0	-1	2	2	2	0	2	0	2	2	0	2	0	2	0	0	2	2	2	0	2	2	0	0	2	0	2
1A_474637508	0	-1	0	0	0	2	2	0	0	0	0	0	2	0	-1	2	0	2	0	2	0	0	0	-1	2	2	2	0	2	0	2	2	0	2	0	2	0	0	2	2	2	0	2	2	0	0	2	0	2
1A_475812620	0	0	0	0	0	2	2	0	0	0	0	0	2	0	0	2	0	2	0	2	0	0	0	2	2	2	2	0	2	0	2	2	0	2	0	2	0	0	2	2	2	0	2	2	0	0	2	0	2
1A_487615986	0	0	0	0	0	2	2	0	0	0	0	0	2	0	0	2	0	2	0	2	0	0	0	2	2	2	2	0	2	0	2	2	0	2	0	2	0	0	2	2	2	0	2	2	0	0	2	0	2
1A_462782470	-1	-1	2	0	0	2	2	-1	0	-1	0	0	2	0	0	2	0	0	0	2	0	0	0	2	2	2	2	0	2	0	2	2	0	2	-1	2	-1	0	2	-1	2	0	2	2	0	0	2	0	2
1A_462782352	0	0	0	0	0	2	2	0	0	0	0	0	2	0	0	2	0	0	0	2	0	0	0	2	2	2	2	0	2	0	2	2	0	2	0	2	0	0	2	2	2	0	2	2	0	0	2	0	2
1A_469579003	0	0	0	0	0	2	-1	0	0	0	0	0	2	0	0	2	0	0	0	2	0	0	0	2	2	2	2	0	2	0	2	2	0	2	0	2	0	0	2	2	2	0	2	2	0	0	2	0	2
1A_471792355	0	0	0	0	0	2	2	0	0	0	0	0	2	0	0	2	0	2	0	2	0	0	0	2	2	2	2	0	2	0	2	2	0	2	0	2	0	0	2	2	2	0	2	2	0	0	2	0	2
1A_471792515	0	0	0	0	0	-1	2	0	0	-1	0	0	2	0	0	2	0	-1	0	2	0	0	0	-1	2	2	2	0	2	0	2	2	0	0	0	-1	0	0	2	2	2	0	2	2	0	0	2	0	-1
1A_477590858	0	0	0	0	0	2	2	0	0	0	0	0	2	0	0	2	0	2	0	2	0	0	0	2	2	2	2	0	2	0	2	2	0	2	0	2	0	0	2	2	2	0	2	2	0	0	2	0	2
1A_471780054	-1	0	0	0	0	-1	2	0	0	-1	0	0	-1	0	0	2	0	2	0	2	0	0	0	-1	2	0	-1	0	2	0	-1	2	0	-1	0	-1	0	0	2	-1	2	0	2	-1	0	0	2	0	-1
1A_480740778	0	0	0	0	0	2	2	0	0	0	0	0	2	0	0	2	0	2	0	2	0	0	0	2	2	2	2	0	2	0	2	2	0	2	0	2	0	0	2	2	2	0	2	2	0	0	2	0	2
1A_484848775	0	0	0	0	0	2	2	0	0	0	0	0	2	0	0	2	0	2	0	2	0	0	0	2	2	2	2	0	2	0	2	2	0	2	0	2	0	0	2	2	2	0	2	2	0	0	2	0	2
1A_453766229	0	0	0	0	0	2	2	0	0	0	0	0	2	0	0	2	0	0	0	2	0	0	0	2	2	2	2	0	2	0	2	2	0	2	0	2	0	0	2	2	2	0	2	2	0	0	2	0	2
1A_449613072	0	0	0	0	0	2	2	0	0	0	0	0	2	0	0	2	0	0	0	2	0	0	0	2	2	2	2	0	2	0	2	2	0	2	0	2	0	0	2	2	2	0	2	2	0	0	2	0	2
1A_449613149	0	0	0	0	0	2	2	0	0	0	0	0	2	0	0	2	0	0	0	2	0	0	0	2	2	2	2	0	2	0	2	2	0	2	0	2	0	0	2	2	2	0	2	2	0	0	2	0	2
1A_89082510	0	0	0	0	0	2	2	0	0	0	0	0	2	2	0	2	0	0	0	2	0	0	0	2	2	2	2	0	0	0	2	2	0	2	0	2	0	0	2	2	2	0	2	2	0	0	2	0	2
1A_374137518	0	0	0	0	0	2	2	0	0	0	0	0	2	2	0	2	0	0	0	2	0	0	0	2	2	2	2	0	2	0	2	2	0	2	0	2	0	0	2	2	2	0	2	2	0	0	2	0	2
1A_371156487	0	0	0	0	0	2	2	0	0	0	0	0	2	2	0	2	0	0	0	2	0	0	0	2	2	2	2	0	2	0	2	2	0	2	0	2	0	0	2	2	2	0	2	2	0	0	2	0	2
1A_371569559	0	0	0	0	0	-1	2	0	0	-1	0	0	-1	2	0	2	0	-1	0	2	0	0	0	-1	2	-1	-1	-1	2	0	2	2	0	-1	0	2	0	0	2	-1	2	0	2	2	0	0	2	0	-1
1A_75584119	0	0	0	0	0	2	2	0	0	0	0	0	2	2	0	2	0	0	0	2	0	0	0	2	2	2	2	0	0	0	2	2	0	2	0	2	0	0	2	2	2	0	2	2	0	0	2	0	2
1A_56363629	0	0	0	0	0	2	2	0	0	0	0	0	0	2	0	2	0	0	0	2	0	0	2	2	2	2	2	0	0	0	2	2	0	-1	2	2	0	0	2	2	2	0	2	2	2	0	2	0	2
1A_46196612	0	-1	0	0	0	2	2	0	0	0	0	2	0	2	0	2	0	0	0	2	0	0	2	2	2	2	2	0	0	2	2	2	0	2	2	2	0	0	2	2	2	0	2	2	2	0	2	0	2
1A_46195749	0	0	0	0	0	2	2	0	0	0	0	2	0	2	0	2	0	0	0	2	0	0	2	2	2	2	2	0	0	2	2	2	0	2	2	2	0	0	2	2	2	0	2	2	2	0	2	0	2
1A_46289460	0	0	0	0	0	2	2	0	0	0	0	2	0	2	0	2	0	0	0	2	0	0	2	-1	2	2	2	0	0	2	2	2	0	-1	2	2	-1	0	2	-1	2	0	2	2	2	0	2	0	-1
1A_46196471	0	0	0	0	0	2	2	0	0	-1	0	0	-1	2	-1	2	0	0	0	2	0	0	2	-1	2	2	2	0	0	2	2	2	0	2	2	2	0	0	2	-1	2	0	2	-1	2	0	2	0	-1
1A_43388618	0	0	0	0	0	2	2	0	0	0	0	2	0	2	0	2	0	2	0	2	0	0	2	2	2	2	2	0	0	2	2	2	0	2	2	2	0	0	2	2	2	0	2	2	2	0	2	0	2
1A_31132812	0	0	0	0	0	2	-1	0	0	-1	0	2	0	2	2	2	0	0	0	2	0	0	2	-1	2	2	-1	0	0	2	2	2	0	2	2	2	2	0	2	-1	2	0	2	2	2	0	2	0	0
1A_31839205	0	0	0	0	0	2	2	0	0	0	0	2	0	2	2	2	0	2	0	2	0	0	2	2	2	2	2	0	0	2	2	2	0	2	2	2	2	0	2	2	2	0	2	2	2	0	2	0	0
1A_30554696	0	0	0	0	0	2	2	0	0	0	0	2	0	2	2	2	0	2	0	2	0	0	2	2	2	2	2	0	0	2	2	2	0	2	2	2	2	0	2	2	2	0	2	2	2	0	2	0	0
1A_28608137	0	0	0	0	0	2	2	0	0	0	0	2	0	2	2	2	0	2	0	2	0	0	2	2	2	2	2	0	0	2	2	0	0	2	2	2	2	0	2	2	2	0	2	2	2	0	2	0	0
1A_27050074	0	0	0	0	0	2	2	0	0	0	0	2	0	2	2	2	0	2	0	2	0	0	2	0	2	2	2	0	0	2	2	0	0	2	2	2	2	0	2	2	2	0	2	2	2	0	2	0	0
1A_22061079	0	0	2	0	2	2	2	0	0	0	0	2	0	2	2	2	0	2	0	2	0	0	2	0	2	2	2	0	0	2	2	0	0	2	2	2	2	0	2	2	0	0	2	2	0	0	2	0	0
1A_14475390	0	0	2	0	2	2	2	0	0	0	0	2	0	2	2	2	0	2	0	2	0	0	2	0	2	2	2	0	0	2	2	0	2	-1	2	2	2	0	2	2	0	0	2	2	0	0	2	0	0
1A_14475371	0	0	2	0	2	2	2	0	0	0	0	2	0	2	2	2	0	2	0	2	0	0	2	0	2	0	2	0	0	2	2	0	2	2	2	2	2	0	2	2	0	0	2	2	0	0	2	0	0
1A_10060535	0	0	2	0	2	2	2	0	0	0	0	2	0	2	2	2	0	2	0	2	0	0	2	0	2	0	2	0	0	2	2	0	2	2	2	2	2	0	2	2	0	0	2	2	0	0	2	0	0
1A_6791427	0	0	2	0	2	2	2	0	0	0	2	2	0	2	2	2	0	2	0	2	2	0	2	0	2	0	2	0	0	0	0	0	2	2	2	2	2	0	2	2	0	0	2	2	0	0	0	0	0
1A_1208114	0	2	2	0	0	2	0	0	0	0	2	2	0	2	2	2	0	2	0	2	2	0	2	0	2	0	-1	2	0	0	0	0	2	2	2	2	2	0	2	0	0	0	2	-1	0	0	0	0	0
5B_684221184	2	2	2	2	2	2	2	0	2	0	2	2	0	0	0	2	0	0	0	2	0	0	0	0	2	0	2	0	0	2	0	2	2	2	2	0	2	0	0	0	2	2	0	0	0	0	0	0	0
5B_691844562	2	0	2	2	2	2	2	0	2	0	2	2	0	0	0	2	0	0	0	2	0	0	0	0	2	0	2	0	0	2	0	2	2	2	2	0	2	0	0	0	2	2	0	0	0	0	0	0	0
5B_700571278	2	0	2	2	2	2	2	0	2	0	2	2	0	0	0	2	0	0	0	2	0	0	0	0	2	0	2	0	0	2	0	2	2	2	2	0	2	0	0	0	2	2	0	0	0	0	0	0	0
5B_700571253	2	0	2	2	2	2	2	0	2	0	2	2	0	0	0	2	0	0	0	2	0	0	0	0	2	0	2	0	0	2	0	2	2	2	2	0	2	0	0	0	2	2	0	0	0	0	0	0	0
5B_702890796	2	0	2	2	2	2	2	0	2	0	2	2	0	0	0	2	0	0	0	2	0	0	0	0	2	2	2	0	0	2	0	2	2	2	2	0	2	0	0	0	2	2	-1	0	0	0	0	0	0
5B_686432989	-1	2	2	2	2	2	2	0	2	0	2	2	0	0	0	2	0	0	0	2	0	0	0	-1	2	2	2	0	0	2	0	2	2	2	2	0	2	0	0	-1	2	2	0	0	0	0	0	0	0
5B_684221267	2	2	2	2	2	2	2	0	2	0	2	2	0	0	0	2	0	0	0	2	0	0	0	0	2	2	2	0	0	2	0	2	2	2	2	0	2	0	0	0	2	2	0	0	0	0	0	0	0
5B_681028907	2	2	2	2	2	2	2	0	2	0	2	2	0	0	0	2	0	0	0	2	0	0	0	0	2	2	2	0	0	2	0	2	2	2	2	0	2	0	0	0	2	2	0	0	0	0	0	0	0
5B_680764048	2	2	2	2	2	2	2	0	2	0	2	2	0	0	0	2	0	0	0	2	0	0	0	0	2	2	2	0	0	2	0	2	2	-1	2	0	2	0	0	0	2	2	0	0	0	0	0	0	0
5B_677160760	2	2	2	2	2	2	2	0	2	0	2	2	0	0	0	2	0	0	0	2	0	0	0	0	2	2	2	0	0	2	0	2	2	2	2	0	2	0	0	0	2	2	-1	0	0	0	0	0	0
5B_667765991	2	2	2	2	2	2	2	0	2	0	2	2	0	0	0	2	0	0	0	2	0	2	0	0	2	0	2	0	0	2	0	2	2	2	2	0	2	0	0	0	2	2	0	0	0	0	0	0	0
5B_664667277	2	2	2	2	2	2	2	0	2	0	2	2	0	0	0	2	0	0	0	2	0	2	0	0	2	0	2	0	0	2	0	2	2	2	2	0	2	0	0	0	2	2	0	0	0	0	0	0	0
5B_662642297	2	2	2	2	2	2	2	0	2	0	2	2	0	0	0	2	0	0	0	2	0	2	0	0	2	0	2	0	0	2	0	2	2	2	2	0	2	0	0	0	2	2	0	0	0	0	0	0	0
5B_660414378	2	2	2	2	2	2	2	0	2	0	2	2	0	0	0	2	0	0	0	2	0	2	0	0	2	0	2	0	0	2	0	2	2	2	2	0	2	0	0	0	2	2	0	0	0	0	0	0	0
5B_660414446	2	2	2	2	2	2	2	0	2	0	2	2	0	0	0	2	0	0	0	2	0	2	0	0	2	0	2	0	0	2	0	2	2	2	2	0	2	0	0	0	2	2	0	0	0	0	0	0	0
5B_655027345	2	-1	2	2	2	0	-1	0	2	0	0	2	0	0	0	2	0	0	0	0	0	2	0	0	2	2	2	0	0	2	0	2	2	0	2	0	2	0	0	0	2	2	0	0	0	0	0	0	0
5B_654359519	2	-1	2	2	2	2	2	0	2	0	2	2	0	0	0	2	0	0	0	2	0	2	0	0	2	2	2	0	0	2	0	2	2	2	2	0	2	0	0	0	2	2	0	0	0	0	0	0	0
5B_650161119	2	2	2	2	2	2	2	0	2	0	2	2	0	0	0	2	0	0	0	2	0	2	0	0	2	2	2	0	0	2	0	2	2	2	2	0	2	0	0	0	2	2	0	0	0	0	0	0	0
5B_647403596	2	2	2	2	2	2	2	0	2	0	2	2	0	0	0	2	0	0	0	2	0	2	0	0	2	2	2	0	0	2	0	2	2	2	2	0	2	0	0	0	2	2	0	0	0	0	0	0	0
5B_641402821	2	2	2	2	2	2	2	0	2	0	2	2	0	0	0	2	0	0	0	2	0	2	0	0	2	0	2	0	0	2	0	2	2	2	2	0	2	0	0	0	2	2	0	0	0	0	0	0	0
5B_635519509	2	2	2	2	2	2	2	0	2	0	2	2	0	0	0	2	0	0	0	2	0	2	0	0	2	0	2	0	0	2	0	2	2	2	2	0	2	0	0	0	2	2	0	0	0	0	0	0	0
5B_616345325	2	2	2	2	2	2	2	0	2	0	2	2	0	0	0	2	0	0	0	2	0	2	0	0	2	0	2	0	0	2	0	2	2	2	2	0	2	0	0	-1	2	2	0	0	0	0	0	0	0
5B_613489961	2	2	2	2	2	2	2	0	2	0	2	2	0	0	0	2	0	0	0	2	0	2	0	0	2	0	2	0	0	2	0	2	2	2	2	0	2	0	0	0	2	2	0	0	0	0	0	0	0
5B_616367920	-1	0	2	-1	2	2	2	0	2	-1	2	2	-1	0	0	2	0	0	0	2	0	2	0	-1	2	0	-1	0	0	2	0	2	2	2	2	0	2	0	0	-1	2	2	0	-1	0	0	0	0	-1
5B_615851500	2	2	2	2	2	2	2	0	2	0	2	2	0	0	0	2	0	0	0	2	0	2	0	0	2	0	2	0	0	2	0	2	2	2	2	0	2	0	0	0	2	2	0	0	0	0	0	0	0
5B_605610803	2	2	2	2	2	2	2	0	2	0	2	2	0	0	0	2	0	0	0	2	0	2	0	0	2	0	2	0	0	2	0	2	2	2	2	0	2	2	0	0	2	2	0	0	0	0	0	0	0
5B_604882065	2	2	2	2	2	2	2	0	2	0	2	2	0	0	0	2	0	0	0	2	0	2	0	0	2	0	2	0	0	2	0	2	2	2	2	0	2	2	0	0	2	2	0	0	0	0	0	0	0
5B_604881855	2	2	2	2	2	2	2	0	2	0	2	2	0	0	0	2	0	0	0	2	0	2	0	0	2	0	2	0	0	2	0	2	2	2	2	0	2	2	0	0	2	2	0	0	0	0	0	0	0
5B_613489896	2	2	2	2	2	2	2	0	2	0	2	2	0	0	0	2	0	0	0	2	0	2	0	0	2	0	2	0	0	2	0	2	2	2	2	0	2	0	0	0	2	2	0	0	0	0	0	0	0
5B_607458116	2	2	2	2	2	2	2	0	2	0	2	2	0	0	0	2	0	0	0	2	0	2	0	0	2	0	2	0	0	2	0	2	2	2	2	0	2	2	0	0	2	2	0	0	0	0	0	0	0
5B_610798848	2	2	2	2	2	2	2	0	2	0	2	2	0	0	0	2	0	0	0	2	0	2	0	0	2	0	2	0	0	2	0	2	2	2	2	0	2	2	0	0	2	2	0	0	0	0	0	0	0
5B_603868013	2	2	2	2	2	2	2	0	2	0	2	2	0	0	0	2	0	0	0	2	0	2	0	0	2	2	2	0	0	2	0	2	2	2	2	0	2	2	0	0	2	2	0	0	0	0	0	0	0
5B_603868045	2	2	2	2	2	2	2	0	2	0	2	2	0	0	0	2	0	0	0	2	0	2	0	0	2	2	2	0	0	2	0	2	2	2	2	0	2	2	0	0	2	2	0	0	0	0	0	0	0
5B_603760636	2	2	2	2	2	2	2	0	2	0	2	2	0	0	0	2	0	0	0	2	0	2	0	-1	2	0	2	0	0	2	0	2	2	-1	2	0	2	2	0	-1	2	2	0	0	0	0	0	0	0
5B_594091810	2	2	2	2	2	2	2	0	2	0	2	2	0	0	0	2	0	0	2	2	0	2	0	0	2	0	2	0	0	2	0	2	2	2	2	0	2	2	0	0	2	2	0	0	0	0	0	0	0
5B_573072203	2	2	2	2	2	2	2	0	2	0	2	2	2	0	0	2	0	2	0	2	0	2	0	0	2	0	2	0	0	2	0	0	2	2	2	2	2	2	0	0	0	2	2	0	0	0	0	2	0
5B_576963138	2	-1	2	2	2	2	2	0	2	0	2	2	2	0	0	2	0	-1	0	2	0	2	0	-1	2	0	2	0	0	2	0	0	2	-1	2	2	2	2	0	-1	0	2	2	0	0	0	0	2	-1
5B_577009211	2	2	2	2	2	2	2	0	2	0	2	2	2	0	0	2	0	2	0	2	0	2	0	0	2	0	2	0	0	2	0	0	2	2	2	2	2	2	0	0	0	2	2	0	0	0	0	2	0
5B_577134950	2	2	2	2	2	2	2	0	2	0	2	2	2	0	0	2	0	2	0	2	0	2	0	0	2	0	2	0	0	2	0	0	2	2	2	2	2	2	0	0	0	2	2	0	0	0	0	2	0
5B_551736418	2	2	2	2	2	2	2	0	2	0	2	2	2	0	0	2	0	2	0	2	0	0	0	0	2	0	2	0	0	2	0	0	2	2	2	2	2	2	0	0	0	2	2	0	0	0	0	2	0
5B_566486943	2	2	2	2	2	2	2	0	2	0	2	2	-1	0	0	2	0	-1	0	2	0	0	0	-1	2	0	2	0	0	2	0	0	2	2	-1	2	2	2	0	-1	0	2	2	0	0	0	0	2	0
5B_557265733	2	2	2	2	2	2	2	0	2	0	2	2	2	0	0	2	0	2	0	2	0	0	0	0	2	0	2	0	0	2	0	0	2	2	2	2	2	2	0	0	0	2	2	0	0	0	0	2	0
5B_564485951	2	2	2	2	2	2	2	0	2	0	2	2	2	0	0	2	0	2	0	2	0	0	0	0	2	2	2	0	0	2	0	0	2	2	2	2	2	2	0	0	0	2	2	0	0	0	0	2	0
5B_559783496	2	2	2	2	2	2	2	0	2	0	2	2	2	0	0	2	0	2	0	2	0	0	0	0	2	2	2	0	0	2	0	0	2	2	2	2	2	2	0	0	0	2	2	0	0	0	0	2	0
5B_552753765	2	2	2	2	2	2	2	0	2	0	2	2	2	0	0	2	0	2	0	2	0	0	0	0	2	2	2	0	0	2	0	0	2	2	2	2	2	2	0	0	0	2	2	0	0	0	0	2	0
5B_571320369	2	-1	2	2	2	2	-1	0	2	0	2	2	2	0	0	2	0	2	0	2	0	0	0	0	2	2	2	0	0	2	0	0	2	2	2	2	2	2	0	0	0	2	2	0	0	0	0	2	0
5B_545792035	2	2	2	2	0	2	2	0	2	0	2	0	0	0	2	2	0	2	0	0	0	0	0	0	2	0	2	0	0	2	0	0	2	2	2	2	0	2	0	0	0	2	2	0	0	0	0	2	0
5B_536227615	2	2	2	2	0	2	2	0	0	0	2	0	0	0	2	2	0	2	0	0	0	0	0	0	2	0	2	0	0	2	0	0	2	2	0	2	0	2	0	0	0	2	2	2	0	0	0	2	0
5B_537968900	2	2	2	2	0	2	2	0	0	0	2	0	0	0	2	2	0	2	0	0	0	0	0	0	2	0	2	0	0	2	0	0	2	2	0	2	0	2	0	0	0	2	2	2	0	0	0	2	0
5B_537968809	2	2	2	2	0	2	2	0	0	0	2	0	0	0	2	2	0	2	0	0	0	0	0	0	2	0	2	0	0	2	0	0	2	2	0	2	0	2	0	0	0	2	2	2	0	0	0	2	0
5B_455518864	2	2	0	2	0	2	2	0	0	0	0	0	0	0	2	0	0	2	0	0	2	0	2	2	0	0	2	0	0	0	0	0	2	2	0	0	2	2	2	0	0	2	0	2	0	0	0	2	0
5B_451451332	2	2	0	2	0	2	2	0	0	0	0	0	0	0	2	0	0	2	0	0	2	0	2	2	0	0	2	0	0	0	0	0	2	-1	0	0	2	2	2	-1	0	2	0	2	0	0	0	2	0
5B_460248470	2	2	0	2	0	2	2	0	0	0	0	0	0	0	2	0	0	2	0	0	2	0	2	2	0	0	2	0	0	0	0	0	2	2	0	0	2	2	2	0	0	2	0	2	0	0	0	2	0
5B_464150711	2	2	0	2	0	2	2	0	0	0	0	0	0	0	2	0	0	2	0	0	2	0	2	2	0	2	2	0	0	0	0	0	2	2	0	0	2	2	2	0	0	2	0	2	0	0	0	2	0
5B_464569780	2	2	0	2	0	2	2	0	0	0	0	0	0	0	2	0	0	2	0	0	2	0	2	2	0	2	2	0	0	0	0	0	2	2	0	0	2	2	2	0	0	2	0	2	0	0	0	2	0
5B_473633712	-1	2	0	2	0	2	2	0	0	-1	0	0	-1	0	-1	0	0	-1	0	0	2	0	2	-1	0	2	2	0	0	0	0	0	2	2	0	0	2	2	2	-1	0	2	0	-1	0	0	0	2	-1
5B_472222379	2	2	0	2	0	2	2	0	0	0	0	0	0	0	2	0	0	2	0	0	2	0	2	2	0	2	2	0	0	0	0	0	2	2	0	0	2	2	2	0	0	2	0	2	0	0	0	2	0
5B_481980668	2	2	0	2	0	2	2	0	0	0	0	0	0	0	2	0	0	2	0	0	2	0	2	-1	0	2	2	0	0	0	0	0	2	2	0	0	2	2	2	-1	0	2	0	2	0	0	0	2	0
5B_480755870	2	2	0	2	0	2	-1	0	0	0	0	0	0	0	2	0	0	2	0	0	2	0	2	2	0	2	2	0	0	0	0	0	2	-1	0	0	2	2	2	0	0	2	0	2	0	0	0	2	0
5B_476254438	2	2	0	2	0	2	2	0	0	0	0	0	0	0	2	0	0	2	0	0	2	0	2	2	0	0	2	0	0	0	0	0	2	2	0	0	2	2	2	0	0	2	0	2	0	0	0	2	0
5B_487831122	2	2	0	2	0	2	2	0	0	0	0	0	0	0	2	0	0	2	0	0	2	0	2	2	0	0	2	0	0	0	0	0	2	2	0	0	2	2	2	0	0	2	0	2	0	0	0	2	0
5B_486371277	2	2	0	2	0	2	2	0	0	0	0	0	0	0	2	0	0	2	0	0	2	0	2	2	0	0	2	0	0	0	0	0	2	2	0	0	2	2	2	0	0	2	0	2	0	0	0	2	0
5B_490051420	2	2	0	2	0	2	2	0	0	0	0	0	0	0	2	0	0	2	0	0	2	0	2	2	0	0	2	0	0	0	0	0	2	2	0	0	2	2	2	0	0	2	0	2	0	0	0	2	-1
5B_476254546	2	2	0	2	0	2	2	0	0	0	0	0	0	0	2	0	0	2	0	0	2	0	2	2	0	0	2	0	0	0	0	0	2	2	0	0	2	2	2	0	0	2	0	2	0	0	0	2	0
5B_478744692	2	2	0	2	0	2	2	0	0	0	0	0	0	0	2	0	0	2	0	0	2	0	2	2	0	2	2	0	0	0	0	0	2	2	0	0	2	2	2	0	0	2	0	2	0	0	0	2	0
5B_473630399	2	2	0	2	0	2	2	0	0	0	0	0	0	0	2	0	0	2	0	0	2	0	2	2	0	2	2	0	0	0	0	0	2	2	0	0	2	2	2	0	0	2	0	2	0	0	0	2	0
5B_463805327	2	2	0	2	0	2	2	0	0	0	0	0	0	0	2	0	0	2	0	0	2	0	2	2	0	2	2	0	0	0	0	0	2	2	0	0	2	2	2	0	0	2	0	2	0	0	0	2	0
5B_463805281	2	2	0	2	0	2	2	0	0	0	0	0	0	0	2	0	0	2	0	0	2	0	2	2	0	2	2	0	0	0	0	0	2	2	0	0	2	2	2	0	0	2	0	2	0	0	0	2	0
5B_448275743	2	2	0	2	0	2	2	0	0	0	0	0	0	0	2	0	0	2	0	0	2	0	2	2	0	2	2	0	0	0	0	0	2	2	0	0	2	2	2	0	0	2	0	2	0	0	0	2	0
5B_445951671	2	2	0	2	0	2	2	0	0	0	0	0	0	0	2	0	0	2	0	0	2	0	2	-1	0	2	2	0	0	0	0	0	2	2	0	0	2	2	2	-1	0	2	0	2	0	0	0	2	0
5B_442836066	2	2	0	2	0	2	2	0	0	0	0	0	0	0	2	0	0	2	0	0	2	0	2	2	0	0	2	0	0	0	0	0	2	2	0	0	2	2	2	2	0	2	0	2	0	0	0	2	0
5B_442835505	2	2	0	2	0	2	2	0	0	0	0	0	0	0	2	0	0	2	0	0	2	0	2	2	0	0	2	0	0	0	0	0	2	2	0	0	2	2	2	0	0	2	0	2	0	0	0	2	0
5B_442835430	2	2	0	2	0	2	2	0	0	0	0	0	0	0	2	0	0	2	0	0	2	0	2	2	0	0	2	0	0	0	0	0	2	2	0	0	2	2	2	0	0	2	0	2	0	0	0	2	0
5B_430754630	2	2	0	2	0	2	2	0	0	0	0	0	0	0	2	0	0	2	0	0	2	0	2	2	0	0	2	0	0	0	0	0	2	2	0	0	2	2	2	0	0	2	0	2	0	0	0	2	0
5B_432152467	2	2	0	2	0	2	2	0	0	0	0	0	0	0	2	0	0	2	0	0	2	0	2	2	0	0	2	0	0	0	0	0	2	2	0	0	2	2	2	0	0	2	0	2	0	0	0	2	0
5B_431071126	2	2	0	2	0	2	2	0	0	0	0	0	0	0	2	0	0	2	0	0	2	0	2	2	0	0	2	0	0	0	0	0	2	2	0	0	2	2	2	0	0	2	0	2	0	0	0	2	0
5B_439051440	2	2	0	2	0	2	2	0	0	0	0	0	0	0	2	0	0	2	0	0	2	0	2	2	0	0	2	0	0	0	0	0	2	2	0	0	2	2	2	0	0	2	0	2	0	0	0	2	0
5B_323508255	-1	2	0	2	0	2	2	0	0	0	0	0	0	0	2	0	0	-1	2	0	2	0	2	-1	0	-1	2	0	0	0	0	0	2	-1	0	0	2	2	2	0	0	2	0	2	0	0	0	-1	0
5B_323073331	2	2	0	2	0	2	2	0	0	0	0	0	0	0	2	0	0	2	2	0	2	0	2	2	0	2	2	0	0	0	0	0	2	2	0	0	2	2	2	0	0	2	0	2	0	0	0	2	0
5B_307447130	2	2	0	2	0	2	2	0	0	0	0	0	0	0	2	0	0	2	2	0	2	0	2	2	0	2	2	0	0	0	0	0	2	2	0	0	2	2	2	0	0	2	0	2	0	0	0	2	0
5B_63396961	2	2	0	2	0	2	2	0	0	0	0	0	0	0	2	0	0	2	2	0	2	0	2	2	0	0	2	0	0	0	0	0	2	2	0	0	2	2	2	0	0	2	0	2	0	0	0	2	0
5B_337843956	2	2	0	2	0	2	2	0	0	0	0	0	0	0	2	0	0	2	2	0	2	0	2	2	0	0	2	0	0	0	0	0	2	2	0	0	2	2	2	0	0	2	0	2	0	0	0	2	0
5B_293142857	-1	-1	0	-1	0	2	-1	0	0	-1	0	0	0	0	2	0	0	2	2	0	2	0	0	-1	0	0	2	0	0	0	0	0	2	2	0	0	2	2	2	-1	0	2	0	-1	-1	0	0	2	-1
5B_261506102	2	2	0	2	0	2	2	0	0	0	0	0	0	0	2	0	0	2	2	0	2	0	0	2	0	0	2	0	0	0	0	0	2	2	0	0	2	2	2	0	0	2	0	2	0	0	0	2	0
5B_295663465	2	2	0	2	0	2	2	0	0	0	0	0	-1	0	2	0	0	2	2	0	2	0	0	0	0	-1	2	-1	0	0	0	0	2	2	0	0	2	2	2	-1	0	2	-1	2	0	0	0	2	-1
5B_37608956	2	0	0	0	0	2	2	0	0	0	0	0	2	0	2	0	0	2	2	0	2	0	0	2	0	2	2	0	0	0	0	0	2	2	0	0	2	2	2	0	0	2	0	2	0	0	0	2	2
5B_40904278	2	0	0	0	0	2	2	0	0	0	0	0	2	0	2	0	0	2	2	0	2	0	0	2	0	2	2	0	0	0	0	0	2	2	0	0	2	2	2	0	0	2	0	2	0	0	0	2	2
5B_40904481	2	0	0	-1	0	-1	2	0	0	-1	0	0	-1	0	2	0	0	2	2	0	2	0	0	-1	0	2	2	-1	0	0	-1	0	2	2	0	0	-1	2	2	-1	0	2	0	2	0	0	0	2	-1
5B_35532038	2	0	0	0	0	2	2	0	0	0	0	0	2	0	2	0	0	2	2	0	2	0	0	2	0	2	2	0	0	0	0	0	2	2	0	0	2	2	2	0	0	2	0	2	0	0	0	2	2
5B_50655398	2	-1	0	0	0	2	2	0	0	0	0	0	2	0	2	0	0	2	2	0	2	0	2	2	0	2	2	0	0	0	0	0	2	2	0	0	2	2	2	0	0	2	0	2	0	0	0	2	0
5B_50207728	2	0	0	0	0	2	2	0	0	0	0	0	2	0	2	0	0	2	2	0	2	0	2	2	0	0	2	0	0	0	0	0	2	2	0	0	2	2	2	0	0	2	0	2	0	0	0	2	0
5B_46745860	2	0	0	0	0	2	2	0	0	0	0	0	2	0	2	0	0	2	2	0	2	0	2	2	0	0	2	0	0	0	0	0	2	2	0	0	2	2	2	0	0	2	0	2	0	0	0	2	2
5B_34582073	2	0	0	0	0	2	2	0	0	0	0	0	2	0	2	0	0	2	2	0	2	0	2	2	0	2	2	0	0	0	0	0	2	2	0	0	2	2	2	0	0	2	0	2	0	0	0	2	2
5B_34582201	2	0	0	0	0	2	2	0	0	0	0	0	2	0	2	0	0	2	2	0	2	0	2	2	0	2	2	0	0	0	0	0	2	2	0	0	2	2	2	0	0	2	0	2	0	0	0	2	2
5B_26950989	2	0	0	0	0	2	2	0	0	0	0	0	2	0	2	0	0	2	2	0	2	0	2	2	0	2	2	0	0	0	0	0	2	2	0	0	2	2	2	0	0	2	0	2	0	0	0	2	2
5B_21754075	2	0	0	0	0	2	2	0	0	0	0	0	2	0	2	0	0	2	2	0	2	0	2	2	0	2	2	0	0	0	0	0	2	2	0	0	2	2	2	0	0	0	0	2	0	0	0	0	2
5B_16109173	2	0	0	0	0	2	0	0	2	0	2	0	-1	0	2	0	0	2	2	0	2	0	2	2	0	2	2	0	0	0	0	0	2	2	0	0	2	0	2	0	0	0	0	2	0	0	0	0	2
5B_17461697	2	0	0	0	0	2	0	0	2	0	2	0	2	0	2	0	0	2	2	0	2	0	2	2	0	2	2	0	0	0	0	0	2	2	0	0	2	0	2	0	0	0	0	2	0	0	0	0	2
5B_13220001	2	0	0	0	0	2	0	0	2	0	2	0	2	0	2	0	0	2	2	0	2	0	2	2	0	2	2	0	2	0	0	0	2	2	0	0	2	0	2	2	2	0	0	2	0	0	0	0	2
5B_13220117	2	0	0	0	0	2	0	0	2	0	2	0	2	0	2	0	0	2	2	0	2	0	2	2	0	2	2	0	2	0	0	0	2	2	0	0	2	0	2	2	2	0	0	2	0	0	0	0	2
5B_11450213	2	0	0	0	0	2	0	0	2	0	2	0	2	0	2	0	0	2	0	0	2	0	2	2	2	2	2	0	2	0	0	0	2	2	0	0	2	0	2	2	2	0	0	2	0	0	0	0	2
5B_10528006	2	0	0	0	0	2	0	0	2	0	2	0	2	0	2	0	0	2	0	0	2	0	2	2	2	0	2	0	2	0	0	0	2	2	0	0	2	0	2	2	2	0	0	2	0	0	0	0	2
3A_11870785	2	0	2	2	0	0	2	2	2	2	0	0	2	2	2	2	2	2	2	0	0	0	2	0	2	0	2	0	0	2	2	0	2	2	2	0	0	2	0	2	0	2	-1	0	2	0	2	2	2
3A_11870851	2	0	2	2	0	0	2	2	2	2	0	0	2	2	2	2	2	2	2	0	0	0	2	0	2	0	2	0	0	2	2	0	2	2	2	0	0	2	0	2	0	2	-1	0	2	0	2	2	2
3A_7505208	2	0	2	2	0	0	2	2	2	2	0	0	2	2	2	2	2	2	2	0	0	0	2	0	2	2	2	0	0	2	2	0	2	2	2	0	0	2	0	2	0	2	-1	0	2	0	2	2	2
3A_7505167	2	0	2	2	0	0	2	2	2	2	0	0	2	2	2	2	2	2	2	0	0	0	0	0	2	2	2	0	0	2	0	0	2	0	2	0	0	2	0	2	0	2	0	0	2	0	0	2	2
3A_15062162	2	0	2	2	0	0	2	2	2	2	0	0	2	2	2	2	2	2	2	0	0	0	0	0	2	0	2	0	0	2	0	0	2	0	2	0	0	2	0	2	0	2	-1	0	2	0	0	2	2
3A_13793458	2	-1	2	2	0	0	2	2	2	2	0	0	2	2	2	2	2	2	2	0	0	0	0	-1	2	0	2	0	0	2	0	0	2	0	2	0	0	2	0	2	0	2	0	0	2	0	0	2	2
3A_13854550	2	-1	2	2	-1	0	2	2	2	2	0	0	2	2	2	2	2	2	2	0	0	0	0	0	2	0	2	0	0	2	0	0	2	-1	2	0	0	2	0	2	0	2	-1	0	2	0	0	2	2
3A_19085822	2	0	2	2	0	0	2	2	2	2	0	2	2	2	2	2	2	2	0	0	0	0	0	0	2	0	2	0	0	2	0	0	2	0	2	0	0	2	0	2	0	2	-1	0	2	0	0	2	2
3A_19085851	2	0	2	2	0	0	2	2	2	2	0	2	2	2	2	2	2	2	0	0	0	0	0	0	2	2	2	0	0	2	0	0	2	0	2	0	0	2	0	2	0	2	-1	0	2	0	0	2	2
3A_19434906	2	0	2	2	0	0	2	2	2	2	0	2	2	2	2	2	2	2	0	0	0	0	0	0	2	2	2	0	0	2	0	0	2	0	2	0	0	2	0	2	0	2	0	0	2	0	0	2	2
3A_19466888	2	0	2	2	0	0	2	2	2	2	0	2	2	2	2	2	2	2	0	0	0	0	0	0	2	2	2	0	0	2	0	0	2	0	2	0	0	2	0	2	0	2	0	0	2	0	0	2	2
3A_22436439	2	0	2	2	0	0	2	2	2	2	0	2	2	2	2	2	2	2	0	0	0	0	2	0	2	2	2	0	0	2	2	0	2	0	2	0	0	0	0	2	0	2	2	0	2	0	2	2	2
3A_23238750	2	0	2	0	0	0	2	2	2	2	0	0	2	2	2	2	2	2	0	0	0	0	2	0	2	0	2	0	0	2	2	0	2	-1	2	0	0	0	0	-1	0	2	2	0	2	0	2	2	2
3A_24200455	2	0	2	0	0	0	2	2	2	2	0	0	2	2	2	2	2	2	0	0	0	0	2	0	0	0	2	0	0	2	2	0	2	0	2	0	0	0	0	2	0	2	2	0	2	0	2	0	2
3A_25065105	2	0	2	0	0	0	2	2	2	2	0	0	2	2	2	2	2	2	0	0	0	0	2	2	0	2	2	0	0	2	2	0	2	0	2	0	0	0	0	0	0	2	2	0	2	0	2	0	2
3A_25065152	2	0	2	0	0	0	2	2	2	2	0	0	2	2	2	2	2	2	0	0	0	0	2	2	0	2	2	0	0	2	2	0	2	0	2	0	0	0	0	0	0	2	2	0	2	0	2	0	2
3A_25183767	2	0	2	0	0	0	2	2	2	2	0	0	2	2	2	2	2	2	0	0	0	0	2	2	0	2	2	0	0	2	2	0	2	0	2	2	0	0	0	0	0	2	2	0	2	0	2	0	2
3A_34610855	2	2	2	0	2	2	0	2	2	2	0	0	0	0	2	2	0	2	0	0	2	0	2	2	0	0	2	0	0	2	0	2	0	0	2	2	0	0	0	0	0	2	2	2	2	2	0	0	2
3A_33447270	2	2	2	0	2	2	0	2	2	2	0	0	0	0	2	2	0	2	0	0	2	0	2	2	0	0	2	0	0	2	0	2	0	0	2	2	0	0	0	0	0	2	2	2	2	2	0	0	2
3A_54622386	2	2	0	0	2	2	0	2	2	2	0	0	0	0	2	2	0	2	0	0	2	2	2	2	0	2	2	0	0	2	0	2	0	0	2	2	0	0	0	0	0	0	2	2	0	2	0	0	2
3A_60939068	2	2	0	0	2	2	0	2	0	2	0	0	0	0	2	2	0	2	0	0	2	2	2	2	0	2	2	0	0	2	0	2	0	0	2	2	0	0	0	0	0	0	2	2	0	2	0	0	2
3A_56670818	2	2	0	0	2	2	0	2	2	2	0	0	0	0	2	2	0	2	0	0	2	2	2	2	0	2	2	0	0	2	0	2	0	0	2	2	0	0	0	0	0	0	2	2	0	2	0	0	2
3A_56731078	2	2	0	0	2	2	0	2	2	2	0	0	0	0	2	2	0	2	0	0	2	2	2	2	0	2	2	0	0	2	0	2	0	0	2	2	0	0	0	0	0	0	2	2	0	2	0	0	2
3A_58835853	2	2	0	0	2	2	0	2	2	2	0	0	0	0	2	2	0	2	0	0	2	2	2	2	0	2	2	0	0	2	0	2	0	0	2	2	0	0	0	0	0	0	2	2	0	2	0	0	2
3A_60938981	2	2	0	0	2	2	0	2	0	2	0	0	0	0	2	2	0	2	0	0	2	2	2	2	0	2	2	0	0	2	0	2	0	0	2	2	0	0	0	0	0	0	2	2	0	2	0	0	2
3A_68481649	2	2	0	0	2	2	0	2	0	2	0	0	0	0	2	2	0	2	0	0	2	2	2	2	0	2	2	0	0	2	0	2	0	0	2	2	0	0	0	0	0	0	2	2	0	2	0	0	2
3A_69702468	-1	-1	0	0	0	2	0	2	0	2	0	0	0	0	2	2	0	2	0	0	2	2	2	-1	0	2	2	0	0	2	0	2	0	0	-1	-1	0	0	0	-1	0	0	2	-1	0	2	0	0	-1
3A_69702545	-1	-1	0	0	-1	2	0	2	0	2	0	0	0	0	2	2	0	2	0	0	2	2	2	-1	0	2	2	0	0	2	0	2	0	0	0	2	0	0	0	-1	0	0	2	-1	0	2	0	0	-1
3A_68481730	2	2	0	0	2	2	0	2	0	2	0	0	0	0	2	2	0	2	0	0	2	2	2	2	0	2	2	0	0	2	0	2	0	0	2	2	0	0	0	0	0	0	2	2	0	2	0	0	2
3A_102934821	2	2	0	0	2	2	0	2	0	2	0	0	0	0	2	2	0	0	0	0	2	2	2	2	0	2	2	0	0	2	0	2	0	0	2	2	0	0	0	0	0	0	2	2	0	2	0	0	2
3A_106442355	2	2	0	0	2	2	0	2	0	2	0	0	0	0	2	2	0	0	0	0	2	2	2	2	0	2	2	0	0	2	0	2	0	0	2	2	0	0	0	0	0	0	2	2	0	2	0	0	2
3A_110066065	2	2	0	0	2	2	0	2	0	2	0	0	0	0	2	2	0	0	0	0	2	2	2	2	0	2	2	0	0	2	0	2	0	0	2	2	0	0	0	0	0	0	2	2	0	2	0	0	2
3A_134595077	2	2	0	0	2	2	0	2	0	2	0	0	0	0	2	2	0	0	0	0	2	2	2	2	0	2	2	0	0	2	0	2	0	0	2	2	0	0	0	0	0	0	2	2	0	2	0	0	2
3A_161469443	2	2	0	0	2	2	0	2	0	2	0	0	0	0	2	2	0	0	0	0	2	2	2	2	0	2	2	0	0	2	0	2	0	0	2	2	0	0	0	0	0	0	2	2	0	2	0	0	2
3A_149356400	2	2	0	0	2	2	0	2	0	2	0	0	0	0	2	2	0	0	0	0	2	2	2	2	0	2	2	0	0	2	0	2	0	0	2	2	0	0	0	0	0	0	2	2	0	2	0	0	2
3A_189888974	2	2	0	0	2	2	0	2	0	2	0	0	0	0	2	2	0	0	0	0	2	2	2	2	0	2	2	0	0	2	0	2	0	0	2	2	0	0	0	0	0	0	2	2	0	2	0	0	2
3A_179770248	2	2	0	0	2	2	0	2	0	2	0	0	0	0	2	2	0	0	0	0	2	2	2	2	0	2	2	0	0	2	0	2	0	0	2	2	0	0	0	0	0	0	2	2	0	2	0	0	2
3A_224351397	2	2	0	0	2	2	0	2	0	2	0	0	0	0	2	2	0	0	0	0	2	2	0	2	0	2	2	0	0	2	0	2	0	0	2	2	0	0	0	0	0	0	2	2	0	2	0	0	2
3A_208353827	2	2	0	0	2	2	0	2	0	2	0	0	0	0	2	2	0	0	0	0	2	2	0	2	0	2	2	0	0	2	0	2	0	0	2	2	0	0	0	0	0	0	2	2	0	2	0	0	2
3A_199140232	2	2	0	0	2	2	0	2	0	2	0	0	0	0	2	2	0	0	0	0	2	2	2	2	0	2	2	0	0	2	0	2	0	0	2	2	0	0	0	0	0	0	2	2	0	2	0	0	2
3A_207453847	2	2	0	0	2	2	-1	2	0	2	0	0	0	0	2	2	0	0	0	0	2	2	2	2	0	2	2	0	0	2	0	2	0	0	2	2	0	0	0	0	0	0	2	2	0	2	0	0	2
3A_209408662	2	2	0	0	2	2	0	2	0	2	0	0	0	2	2	2	0	0	0	0	2	2	0	2	0	2	2	0	0	2	0	2	0	0	2	2	0	0	0	-1	0	0	2	2	0	2	0	0	2
3A_354170374	2	2	0	0	2	2	0	2	0	2	0	0	0	0	2	2	0	0	0	0	2	2	0	2	0	2	2	0	0	2	0	2	0	0	2	2	0	0	0	0	0	0	2	2	0	2	0	0	2
3A_232266943	2	2	0	0	2	2	0	2	0	2	0	0	0	0	2	2	0	0	0	0	2	2	0	2	0	2	2	0	0	2	0	2	0	0	2	2	0	0	0	0	0	0	2	2	0	2	0	0	2
3A_436877258	2	2	0	0	2	2	0	2	0	2	0	0	0	0	2	2	0	0	0	0	2	2	0	2	0	2	2	0	0	2	0	2	0	0	2	2	0	0	0	0	0	0	2	2	0	2	0	0	2
3A_434801645	2	-1	0	0	2	2	0	2	0	2	0	0	0	0	2	2	0	0	0	0	2	2	0	-1	0	2	2	0	0	2	0	2	0	0	2	2	0	0	0	0	0	0	2	2	0	2	0	0	2
3A_443519416	2	2	0	0	2	2	0	2	0	2	0	0	0	0	2	2	0	0	0	0	2	2	0	2	0	2	2	0	0	2	0	2	0	0	2	2	0	0	0	0	0	0	2	2	0	2	0	0	2
3A_452366053	2	2	0	0	2	2	0	2	0	2	0	0	0	0	2	2	0	0	0	0	2	2	0	2	0	2	2	0	0	2	0	2	0	0	2	2	0	0	0	0	0	0	2	2	0	2	0	0	2
3A_467341115	2	2	0	0	2	2	0	2	2	2	0	0	0	0	2	2	0	0	0	0	2	2	0	2	0	2	2	0	0	2	0	2	0	0	2	2	0	0	0	0	0	0	2	2	0	2	0	0	2
3A_484578779	2	2	0	0	2	0	0	2	2	2	0	0	0	0	2	2	0	0	0	0	2	2	0	2	0	2	2	0	0	2	0	2	0	0	2	2	0	0	0	0	0	0	2	2	0	2	0	0	2
3A_484654175	2	-1	0	0	2	0	0	2	2	-1	0	0	0	0	2	2	0	0	0	0	2	2	0	-1	0	2	2	0	0	2	0	2	0	0	2	2	0	0	0	0	0	0	2	2	0	2	0	0	-1
3A_477796895	2	2	0	0	2	0	0	2	2	2	0	0	0	0	2	2	0	0	0	0	2	2	0	2	0	2	2	0	0	2	0	2	0	0	2	2	0	0	0	0	0	0	2	2	0	2	0	0	2
3A_492185407	2	2	0	0	2	0	0	2	2	2	0	0	0	0	2	2	0	0	0	0	2	2	0	2	0	2	2	0	0	2	0	2	0	0	2	2	0	0	0	0	0	0	2	2	0	2	0	2	2
3A_507462934	2	2	0	0	2	0	0	2	2	2	0	0	0	0	2	2	0	0	0	0	2	2	0	2	0	2	2	0	0	2	0	2	0	0	2	2	0	0	0	0	0	0	2	2	0	2	0	2	2
3A_514400431	2	2	0	0	2	0	0	2	2	2	0	0	0	0	2	2	0	0	0	0	2	2	0	2	0	2	2	0	0	2	0	2	0	0	2	2	0	0	2	0	0	0	2	2	0	2	0	2	2
3A_522753976	2	2	0	0	2	0	0	2	2	2	0	0	0	0	2	2	0	0	0	0	2	2	0	2	0	2	2	0	0	2	0	2	0	0	2	2	0	0	2	0	0	0	2	2	0	2	0	2	2
3A_525825022	2	2	0	0	2	0	0	2	2	2	0	0	0	0	2	2	0	0	0	0	2	2	0	2	0	0	2	0	0	2	0	2	0	-1	2	2	0	0	2	0	0	0	2	2	0	2	0	2	2
3A_525825220	2	2	0	0	2	0	0	2	2	-1	0	0	-1	0	2	2	0	-1	0	0	2	2	0	-1	0	-1	-1	-1	0	2	-1	2	0	-1	2	2	-1	0	2	-1	0	0	2	2	0	2	0	2	-1
3A_522770139	2	2	0	0	2	0	0	2	2	-1	0	0	-1	0	2	2	0	0	0	0	2	2	0	-1	0	2	2	-1	0	2	-1	2	0	0	2	2	0	0	2	-1	0	0	2	2	0	2	0	2	-1
3A_522770381	2	2	0	0	2	0	0	2	2	2	0	0	0	0	2	2	0	0	0	0	2	2	0	2	0	0	2	0	0	2	0	2	0	0	2	2	0	0	2	0	0	0	2	2	0	2	0	2	2
3A_534325025	2	-1	0	0	2	0	0	2	2	-1	0	0	0	0	2	2	0	0	0	0	2	2	0	2	0	0	-1	0	0	2	0	2	0	0	2	2	0	0	2	0	0	0	2	2	0	2	0	2	2
3A_533843423	2	2	0	0	2	0	0	2	2	2	0	0	0	0	2	2	0	0	0	0	2	2	0	2	0	0	2	0	0	2	0	2	0	0	2	2	0	0	2	0	0	0	2	2	0	2	0	2	-1
3A_533843400	2	2	0	0	2	0	0	2	2	2	0	0	0	0	2	2	0	0	0	0	2	2	0	2	0	2	2	0	0	2	0	2	0	0	2	2	0	0	2	0	0	0	2	2	0	2	0	2	-1
3A_534326783	2	2	0	0	2	0	0	2	2	2	0	0	0	0	2	2	0	0	0	0	2	2	0	2	0	2	2	0	0	2	0	2	0	0	2	2	0	0	2	0	0	0	2	2	0	2	0	2	2
3A_597825929	2	2	0	0	2	0	0	2	2	2	0	0	0	0	2	2	0	0	0	0	2	2	0	2	0	0	2	0	0	2	0	2	0	0	2	2	0	0	2	0	0	0	2	2	2	2	0	2	2
3A_609429465	2	2	0	0	2	0	0	2	2	2	0	0	0	0	2	2	0	0	0	0	2	2	0	2	2	0	2	0	0	2	0	2	0	0	2	2	2	0	2	0	0	0	-1	2	2	2	0	2	2
3A_616659606	2	2	0	0	2	0	2	2	2	2	2	0	2	0	2	2	0	0	0	0	2	2	0	2	2	2	2	0	0	2	0	2	0	0	2	2	2	0	2	0	0	0	2	2	2	2	0	2	2
3A_638328149	2	2	0	0	2	0	2	2	2	2	2	0	2	0	2	2	0	2	0	0	2	2	0	2	2	2	2	0	0	2	0	2	0	0	2	2	2	0	2	0	0	0	2	2	2	2	0	2	2
3A_621117330	2	2	0	0	2	0	2	2	2	2	2	0	2	0	2	2	0	2	0	0	2	2	0	2	2	2	2	0	0	2	0	2	0	0	2	2	2	0	2	0	0	0	2	2	2	2	0	2	2
3A_646670697	2	2	2	0	2	0	2	2	2	2	2	0	2	0	2	2	0	2	0	0	2	2	0	2	2	2	2	0	0	2	0	2	0	0	2	2	2	0	2	0	0	0	2	2	2	2	0	2	2
3A_623405134	2	2	0	0	2	0	2	2	2	2	2	0	2	0	2	2	0	2	0	0	2	2	0	2	2	2	2	0	0	2	0	2	0	0	2	2	2	0	2	0	0	0	2	2	2	2	0	2	2
3A_622695831	2	2	0	0	2	0	2	2	2	2	2	0	2	0	2	2	0	2	0	0	2	2	0	2	2	2	2	0	0	2	0	2	0	0	2	2	2	0	2	0	0	0	2	2	2	2	0	2	2
3A_646313882	-1	2	2	0	2	0	2	2	2	-1	2	0	2	0	2	2	0	2	0	0	2	2	0	2	2	-1	2	0	0	2	0	2	0	0	2	2	-1	0	2	0	0	0	-1	2	2	2	0	2	-1
3A_650835555	2	2	2	0	2	0	2	2	2	2	2	0	2	0	2	2	0	2	0	0	2	2	0	2	2	2	2	0	0	2	0	2	0	0	2	2	2	0	2	0	0	0	2	2	2	2	0	2	2
3A_659423334	2	2	2	0	2	0	2	2	2	2	2	0	2	0	2	2	0	2	0	0	2	2	0	2	2	2	2	0	0	2	0	2	0	0	2	2	2	0	2	0	0	0	2	2	2	2	0	2	2
3A_658657616	2	2	2	0	2	0	2	2	2	2	2	0	2	0	2	2	0	2	0	0	2	2	0	2	2	2	2	0	0	2	0	2	0	0	2	2	2	0	2	0	0	0	2	2	2	2	0	2	2
3A_666046759	2	2	2	0	2	0	2	2	2	2	2	0	2	0	2	2	0	2	0	0	2	2	0	2	2	2	2	0	0	2	0	2	0	0	2	2	2	0	2	0	0	0	2	2	2	2	0	2	2
3A_650566328	2	-1	2	0	2	0	2	2	2	-1	2	0	2	0	-1	2	0	2	0	0	2	2	0	-1	2	2	2	0	0	2	0	2	0	0	-1	2	2	0	2	2	0	0	2	-1	2	2	0	2	-1
3A_650566332	2	-1	2	-1	2	0	2	2	2	-1	2	0	2	0	-1	2	0	2	0	0	2	2	0	-1	2	2	2	0	0	2	0	2	0	0	-1	2	-1	0	2	2	0	0	2	-1	2	2	0	2	-1
3A_650415905	2	2	2	0	2	0	2	2	2	2	2	0	2	0	2	2	0	2	0	0	2	2	0	2	2	2	2	0	0	2	0	2	0	0	2	2	2	0	2	0	0	0	2	2	2	2	0	2	2
3A_653919337	2	2	2	0	2	0	2	2	2	2	2	0	2	0	2	2	0	2	0	0	2	2	0	2	2	2	2	0	0	2	0	2	0	0	2	-1	2	0	2	-1	0	0	-1	-1	2	2	0	2	-1
3A_655885348	2	2	2	0	2	0	2	2	2	2	2	0	2	0	2	2	0	2	0	0	2	2	0	2	2	0	2	0	0	2	0	2	0	0	2	2	2	0	2	0	0	0	2	2	2	2	0	2	2
3A_681755353	2	2	2	0	2	0	2	2	2	2	2	0	2	0	2	2	0	2	0	0	2	2	0	2	2	0	2	0	0	2	0	2	0	0	2	2	2	0	2	0	0	0	2	2	2	2	0	2	2
3A_673718026	2	2	2	0	2	0	2	2	2	2	2	0	2	0	2	2	0	2	0	0	2	2	0	2	2	0	2	0	0	2	0	2	0	0	2	2	2	0	2	0	0	0	2	2	2	2	0	2	2
3A_686724449	2	2	2	0	2	0	2	2	2	2	2	0	2	0	2	2	0	2	0	0	2	2	0	2	2	2	2	0	0	2	0	2	0	0	2	2	2	0	2	0	0	0	2	2	2	2	0	2	2
3A_686679466	2	2	2	0	2	0	2	2	2	2	2	0	2	0	2	2	0	2	0	0	2	2	0	2	2	2	2	0	0	2	0	2	0	0	2	2	2	0	2	0	0	0	2	2	2	2	0	2	2
3A_685137637	2	2	2	0	2	0	2	2	2	2	2	0	2	0	2	2	0	2	0	0	2	2	0	2	2	2	2	0	0	2	0	2	0	0	2	2	2	0	2	0	0	0	2	2	2	2	0	2	2
3A_688622043	2	2	2	0	2	0	2	2	2	2	2	0	2	0	2	2	0	2	0	0	2	2	0	2	2	2	2	0	0	2	0	2	0	0	2	2	2	0	2	0	0	0	2	2	2	2	0	2	2
3A_688580956	2	2	2	0	2	0	2	2	2	2	2	0	2	0	2	2	0	2	0	0	2	2	0	2	2	2	2	0	0	2	0	2	0	0	2	2	2	0	2	0	0	0	2	2	2	2	0	2	2
3A_688693273	2	2	2	0	2	0	2	2	2	2	2	0	2	0	2	2	0	2	0	0	2	2	0	2	2	2	2	0	0	2	0	2	0	0	2	2	2	0	2	0	0	0	2	2	2	2	0	2	2
3A_701009953	2	2	2	0	2	0	2	0	2	2	0	2	2	0	0	2	0	2	0	0	0	2	0	2	2	0	2	0	0	0	0	2	0	0	2	2	2	0	2	0	0	0	2	2	2	2	0	2	2
3A_701176733	2	2	2	0	2	0	2	0	2	2	0	2	2	0	0	2	0	2	0	0	0	2	0	2	2	2	2	0	0	0	0	2	0	0	2	2	2	0	2	0	0	0	2	2	2	2	0	2	2
3A_720224571	2	0	0	0	2	2	-1	0	2	2	0	2	2	0	0	2	0	2	0	0	0	2	0	2	2	2	0	0	0	2	0	0	0	-1	0	2	2	0	2	0	0	0	0	2	0	0	0	0	0
3A_720224649	2	0	0	0	2	2	0	0	2	2	0	2	2	0	0	2	0	2	0	0	0	2	0	2	2	0	0	0	0	2	0	0	0	-1	0	2	2	0	2	0	0	0	0	2	0	0	0	0	0
3A_722932445	2	0	0	0	2	2	0	0	2	2	0	2	2	0	0	2	0	2	0	0	0	2	0	2	2	2	0	0	0	2	0	0	0	2	0	2	2	0	2	0	0	2	0	2	0	0	0	0	0
3A_722932515	2	0	0	0	2	2	0	0	2	2	0	2	2	0	0	2	0	2	0	0	0	2	0	2	2	0	0	0	0	2	0	0	0	2	0	2	2	0	2	0	0	2	0	2	0	0	0	0	0
3A_722932355	2	0	0	0	-1	2	0	0	2	-1	0	2	2	0	0	2	0	2	0	0	0	2	0	-1	2	0	0	0	0	2	0	0	0	2	0	2	2	0	2	0	0	2	0	-1	0	0	0	0	0
3A_722932363	2	0	0	0	-1	2	0	0	2	-1	0	2	2	0	0	2	0	2	0	0	0	2	0	-1	2	0	0	0	0	2	0	0	0	2	0	2	2	0	2	0	0	2	0	2	0	0	0	0	0
3A_722932342	2	0	0	0	-1	2	0	0	2	-1	0	2	0	0	0	2	0	2	0	0	0	2	0	-1	2	0	0	0	0	2	0	0	0	2	0	2	-1	0	2	-1	0	2	0	-1	0	0	0	0	0
3A_724717689	2	0	0	0	2	2	0	0	2	2	0	2	2	0	0	2	0	2	0	0	0	2	0	2	2	0	0	0	0	2	0	0	0	2	0	2	2	2	2	0	0	2	0	2	0	0	0	0	0
3A_744873057	2	0	0	0	0	2	2	2	2	2	0	2	2	2	0	2	0	2	0	0	2	0	2	2	2	2	0	0	2	2	0	0	0	2	0	2	0	2	0	0	0	0	0	2	2	0	0	0	0
3A_746964504	2	0	0	0	0	2	2	2	2	2	0	2	2	2	0	2	0	2	0	0	2	0	2	2	2	2	0	0	2	2	0	0	0	2	0	2	0	2	0	0	0	0	0	2	2	0	0	0	0
7B_632335548	2	0	2	0	2	0	2	0	0	0	2	2	2	2	0	2	2	2	2	0	2	0	2	0	0	2	0	0	0	2	2	2	2	0	2	2	2	2	2	2	2	0	2	2	0	2	2	0	0
7B_654921887	2	0	2	0	2	0	2	0	0	0	2	2	2	2	0	2	2	2	2	0	2	0	2	0	0	2	0	0	0	2	2	2	2	0	2	2	2	2	2	2	2	0	2	2	0	2	2	0	0
7B_664103543	2	0	2	0	2	0	2	0	0	0	2	2	2	2	0	2	2	2	2	0	2	0	2	0	0	2	0	0	0	2	2	2	2	0	2	2	2	2	2	2	2	0	2	2	0	2	2	0	0
7B_656188951	2	0	2	0	2	0	2	0	0	0	2	2	2	2	0	2	2	2	2	0	2	0	2	0	0	2	0	0	0	2	2	2	2	0	2	2	2	2	2	2	2	0	2	2	0	2	2	0	0
7B_659732599	2	0	2	0	2	0	2	0	0	0	2	2	2	2	0	2	2	2	2	0	2	0	2	0	0	2	0	0	0	2	2	2	2	0	2	2	2	2	2	2	2	0	2	2	0	2	2	0	0
7B_646696085	2	0	2	0	2	0	2	0	0	0	2	2	2	2	0	2	2	2	2	0	2	0	2	0	0	2	0	0	0	2	2	2	2	0	2	2	2	2	2	2	2	0	2	2	0	2	2	0	0
7B_645503519	2	0	2	0	2	0	2	0	0	0	2	2	2	2	0	2	2	2	2	0	2	0	2	0	0	2	0	0	0	2	2	2	2	0	2	2	2	2	2	2	2	0	2	2	0	2	2	0	0
7B_643502428	2	0	2	0	2	0	2	0	0	0	2	2	2	2	0	2	2	2	2	0	2	0	2	0	0	2	0	0	0	2	2	2	2	0	2	2	2	2	2	2	2	0	2	2	0	2	2	0	0
7B_640672179	2	0	2	0	2	0	2	0	0	0	2	2	2	2	0	2	2	2	2	0	2	0	2	0	0	2	0	0	0	2	2	2	2	0	2	2	2	2	2	2	2	0	2	2	0	2	2	0	0
7B_640017468	2	0	2	0	2	0	-1	0	0	0	2	2	2	2	0	2	2	2	2	0	2	0	2	0	0	2	0	0	0	2	2	2	2	0	2	2	2	2	2	2	2	0	2	2	0	2	2	0	0
7B_630104681	2	0	2	0	2	0	2	0	0	0	2	2	2	2	0	2	2	2	2	0	2	0	2	0	0	2	0	0	0	2	2	2	2	0	2	2	2	2	2	2	2	0	2	2	0	2	2	0	0
7B_633672625	2	0	2	0	2	0	2	0	0	0	2	2	2	2	0	2	2	2	2	0	2	0	2	0	0	2	0	0	0	2	2	2	2	0	2	2	2	2	2	2	2	0	2	2	0	2	2	0	0
7B_633102498	2	0	2	0	2	0	2	0	0	0	2	2	2	2	0	2	2	2	2	0	2	0	2	0	0	2	0	0	0	2	2	2	2	0	2	2	2	2	2	2	2	0	2	2	0	2	2	0	0
7B_594984801	2	0	2	0	2	0	2	0	0	0	0	2	2	2	0	2	2	2	2	2	2	0	2	0	2	2	0	0	0	2	2	2	2	0	0	2	2	0	2	2	2	0	2	2	0	2	2	0	0
7B_593984081	2	0	2	0	2	0	2	0	0	0	0	2	-1	2	0	2	2	2	2	2	2	0	2	0	2	2	0	0	0	2	-1	2	2	2	0	2	2	0	2	2	2	0	-1	-1	0	2	2	0	0
7B_587518627	2	0	2	0	2	0	2	0	0	0	0	2	2	2	0	2	2	2	2	2	2	0	2	0	2	2	0	0	0	2	2	2	2	2	2	2	2	0	2	2	2	0	2	2	2	2	2	0	0
7B_518392388	2	0	2	0	2	0	2	0	0	0	0	2	2	2	0	2	2	2	2	2	2	0	2	0	2	2	0	0	0	2	2	2	2	2	2	2	0	0	2	2	2	2	2	2	2	2	2	0	0
7B_502646528	2	0	2	0	2	0	2	0	0	0	0	2	2	2	0	2	2	2	2	2	2	0	2	0	2	2	0	0	0	2	2	2	2	2	2	2	0	0	2	2	2	2	2	2	2	2	2	0	0
7B_506240803	2	0	2	0	2	0	2	0	0	0	0	2	2	2	0	2	2	2	2	2	2	0	2	0	2	2	0	0	0	2	2	2	2	2	2	2	0	0	2	2	2	2	2	2	2	2	2	0	0
7B_506395761	2	0	2	0	2	0	-1	0	0	0	0	2	2	2	0	2	2	2	2	2	2	0	2	0	2	2	0	0	0	2	2	2	2	2	2	2	0	0	2	2	2	2	2	2	2	2	2	0	0
7B_499647911	2	0	0	0	2	0	2	0	0	0	0	2	2	2	0	2	2	2	2	2	2	0	2	0	2	2	0	0	0	2	2	2	2	2	2	2	0	0	2	2	2	2	2	2	2	2	2	0	0
7B_496273184	2	0	0	0	2	0	-1	0	0	0	0	2	2	2	0	2	2	2	2	2	2	0	2	0	2	2	0	0	0	2	2	2	2	2	2	2	0	0	2	2	2	2	2	0	2	2	2	0	0
7B_497086789	2	0	0	0	2	0	2	0	0	0	0	2	2	2	0	2	2	2	2	2	2	0	2	0	2	2	0	0	0	2	2	2	2	2	2	2	0	0	2	2	2	2	2	0	2	2	2	0	0
7B_496839226	2	0	0	0	2	0	2	0	0	0	0	2	2	2	0	2	2	2	2	2	2	0	2	0	2	2	0	0	0	2	2	2	2	2	2	2	0	0	2	2	2	2	2	0	2	2	2	0	0
7B_494606035	2	0	0	0	2	0	2	0	0	0	0	2	2	2	0	2	2	2	2	2	2	0	2	0	2	2	0	0	0	2	2	2	2	2	2	2	0	0	2	2	2	2	2	0	2	2	2	0	0
7B_489686912	2	0	0	0	2	0	2	0	0	0	0	2	2	2	0	2	2	2	2	2	2	0	2	0	2	2	0	0	0	2	2	2	2	2	2	2	0	0	2	2	2	2	2	0	2	2	2	0	0
7B_455274386	2	0	0	0	2	0	2	0	0	0	0	2	2	2	0	2	2	2	2	2	2	0	2	0	2	2	0	0	2	2	2	2	2	2	2	2	0	0	2	2	2	2	2	0	2	2	2	0	0
7B_447273782	-1	0	0	0	2	2	2	0	0	0	0	2	-1	2	0	2	2	2	2	2	2	0	2	-1	2	2	0	0	2	2	2	2	2	2	2	2	0	0	2	2	2	2	2	0	2	2	2	0	-1
7B_192798123	2	0	0	0	2	2	2	0	0	0	0	2	2	2	0	2	2	2	2	2	2	0	2	0	2	2	0	0	2	2	2	2	2	2	2	2	0	0	2	2	2	2	2	0	2	2	2	0	0
7B_259776340	2	0	0	0	2	2	2	0	0	0	0	2	2	2	0	2	2	2	2	2	2	0	2	0	2	2	0	0	2	2	2	2	2	2	2	2	0	0	2	2	2	2	2	0	2	2	2	0	0
7B_436792624	2	0	0	0	2	0	2	0	0	0	0	2	2	2	0	2	2	2	2	0	2	0	2	0	2	2	0	0	2	2	0	2	2	0	2	2	0	0	0	2	2	2	2	0	2	2	0	0	0
7B_474527098	2	0	0	0	2	0	2	0	0	0	0	2	2	2	0	2	2	2	2	0	2	0	2	0	2	2	0	0	2	2	0	2	2	0	2	2	0	0	0	2	2	2	2	0	2	2	0	0	0
7B_468001039	2	0	0	0	2	0	-1	0	0	0	0	2	2	2	0	2	2	2	2	0	2	0	2	0	2	2	0	0	2	2	0	2	2	0	2	2	0	0	0	2	2	2	2	0	2	2	0	0	0
7B_271403949	2	0	0	0	2	0	2	0	0	0	0	2	2	2	0	2	2	2	2	0	2	0	2	0	2	2	0	0	2	2	0	2	2	0	2	2	0	0	0	2	2	2	2	0	2	2	0	0	0
7B_401290364	2	0	0	0	2	0	2	0	0	0	0	2	2	2	0	2	2	2	2	0	2	0	2	0	2	2	0	0	2	2	0	2	2	0	2	2	0	0	0	2	2	2	2	0	2	2	0	0	0
7B_214161432	2	0	0	0	2	0	2	0	0	0	0	2	2	2	0	2	2	2	2	0	2	0	2	0	2	2	0	0	2	2	0	2	2	0	2	2	0	0	0	2	2	2	2	0	2	2	0	0	0
7B_154277414	2	0	0	0	2	0	2	0	0	0	0	2	2	2	0	2	2	2	2	0	2	0	2	0	2	2	0	0	2	2	0	2	2	0	2	2	0	0	0	2	2	2	2	0	2	2	0	0	0
7B_158218293	2	0	0	0	2	0	2	0	0	0	0	2	2	2	0	2	2	2	2	0	2	0	2	0	2	2	0	0	2	2	0	2	2	0	2	2	0	0	0	2	2	2	2	0	2	2	0	0	0
7B_143856025	2	0	0	0	2	0	2	0	0	0	0	2	2	2	0	2	2	2	2	0	2	0	2	0	2	2	0	0	2	2	0	2	2	0	2	2	0	0	0	2	2	2	2	0	2	2	0	0	0
7B_110109760	2	0	0	0	2	2	2	0	0	0	0	2	2	2	0	2	2	2	0	2	2	0	2	0	2	2	0	0	2	2	2	2	2	2	2	2	0	0	2	2	2	2	2	0	2	2	2	0	0
7B_111991402	2	0	0	0	2	2	2	0	0	0	0	2	2	2	0	2	2	2	0	2	2	0	2	0	2	2	0	0	2	2	2	2	2	2	2	2	0	0	2	2	2	2	2	0	2	2	2	0	0
7B_90885206	2	0	0	0	2	2	2	0	0	0	0	2	2	2	0	2	2	2	0	2	2	0	2	0	2	2	0	0	2	2	2	2	2	2	2	2	0	0	2	2	2	2	2	0	2	2	2	0	0
7B_79952360	2	0	0	0	2	2	2	0	0	0	0	2	2	2	0	2	2	2	0	2	2	0	2	0	2	2	0	0	2	2	2	2	2	2	2	2	0	0	2	2	2	2	2	0	2	2	2	0	0
7B_104474930	2	0	0	0	2	2	2	0	0	0	0	2	2	2	0	2	2	2	0	2	2	0	2	0	2	2	0	0	2	2	2	2	2	2	2	2	0	0	2	2	2	2	2	0	2	2	2	0	0
7B_42161133	2	0	0	0	2	2	2	0	0	0	0	2	2	2	0	2	2	0	0	2	2	0	2	0	2	2	0	0	2	2	2	2	2	2	2	0	0	0	2	2	2	2	0	0	2	2	2	0	0
7B_42179248	2	0	0	0	2	2	2	0	0	0	0	2	2	2	0	2	2	0	0	2	2	0	2	0	2	2	0	0	2	2	2	2	2	2	2	0	0	0	2	2	2	2	0	0	2	2	2	0	0
7B_45329154	2	0	0	0	2	2	2	0	0	0	0	2	2	2	0	2	2	0	0	2	2	0	2	0	2	2	0	0	2	2	2	2	2	2	2	0	0	0	2	2	2	2	0	0	2	2	2	0	0
7B_36387126	2	0	0	0	2	2	2	0	0	0	0	2	2	2	0	2	2	0	0	2	2	0	2	0	2	2	0	0	2	2	2	2	2	2	2	0	0	0	2	2	2	2	0	0	2	2	2	0	0
7B_37094226	2	0	0	0	2	2	2	0	0	0	0	2	2	2	0	2	2	0	0	2	2	0	2	0	2	2	0	0	2	2	2	2	2	2	2	0	0	0	2	2	2	2	0	0	2	2	2	0	0
7B_33812759	2	0	0	0	2	2	2	0	0	0	0	2	2	2	0	2	2	0	0	2	2	0	2	0	2	2	0	0	2	2	2	2	2	2	2	0	0	0	2	2	2	2	2	0	2	2	2	0	0
7B_19685008	2	0	0	0	2	2	2	0	0	0	0	2	0	2	2	2	2	0	0	2	2	0	2	0	2	2	0	0	2	0	2	2	2	2	2	0	0	2	2	2	2	2	2	0	2	2	2	0	0
7B_6479686	0	2	0	2	2	2	2	2	0	2	2	2	0	2	2	0	2	0	0	2	2	0	2	0	2	2	2	0	2	0	2	0	2	2	2	0	0	2	2	2	2	2	2	0	2	2	2	0	0
7B_5981256	0	2	0	2	2	2	2	2	0	2	2	2	0	2	2	0	2	0	0	2	2	0	2	0	2	2	2	0	2	0	2	0	2	2	2	0	0	2	2	2	2	2	2	0	2	2	2	0	0
7B_5060628	0	2	0	2	2	2	2	2	0	2	2	2	0	2	2	0	2	0	0	2	0	0	2	0	2	2	2	0	2	0	2	0	2	-1	2	0	0	2	2	2	2	2	2	0	2	2	2	0	0
7A_670876956	0	0	2	0	2	2	2	2	0	0	0	2	0	2	2	2	2	0	2	0	0	2	0	2	0	2	2	2	2	2	2	0	0	2	0	2	0	0	0	0	0	0	0	2	2	2	2	2	0
7A_663494641	0	0	2	0	2	2	2	2	0	0	0	2	0	2	2	2	2	0	2	0	0	2	0	2	0	2	2	2	2	2	2	0	0	2	0	2	0	0	0	0	0	0	0	2	2	2	2	2	0
7A_657918003	0	0	2	0	2	2	2	2	0	0	0	2	0	2	2	2	2	0	2	0	0	2	0	2	0	2	2	2	2	2	2	0	0	2	0	2	0	0	0	0	2	0	0	2	2	2	2	2	0
7A_653469089	0	0	2	0	2	2	2	2	0	-1	0	2	0	2	2	2	2	0	2	0	0	2	0	2	0	2	2	2	2	2	2	0	0	2	0	2	0	0	0	0	2	0	0	2	2	2	2	2	0
7A_652993423	0	0	2	0	2	2	2	2	0	0	0	2	0	2	2	2	2	0	2	0	0	2	0	2	0	2	2	2	2	2	2	0	0	2	0	2	0	0	0	0	2	0	0	2	2	2	2	2	0
7A_646758421	0	0	2	2	2	2	2	2	0	0	0	2	0	2	2	2	2	0	2	0	0	2	0	2	0	2	2	2	2	2	2	0	0	2	0	2	0	0	0	0	2	0	0	2	2	2	2	2	0
7A_646758302	0	0	2	2	2	2	2	2	0	0	0	2	0	2	2	2	2	0	2	0	0	2	0	2	0	2	2	2	2	2	2	0	0	2	0	2	0	0	0	0	2	0	0	2	2	2	2	2	0
7A_644123596	0	0	2	2	2	2	2	2	0	0	0	2	0	2	2	2	2	0	2	0	0	2	0	2	0	2	2	2	2	2	2	0	0	2	0	2	0	0	0	0	0	0	0	2	2	2	2	2	0
7A_644123538	0	0	2	2	2	2	2	2	0	0	0	2	0	2	2	2	2	0	2	0	0	2	0	2	0	2	2	2	2	2	2	0	0	2	0	2	0	0	0	0	0	0	0	2	2	2	2	2	0
7A_638498177	0	0	2	2	2	2	2	2	0	0	0	2	0	2	2	2	2	0	2	0	0	2	0	-1	0	2	2	2	2	2	2	0	0	2	0	2	0	0	0	-1	0	0	0	2	2	2	2	2	0
7A_637964955	0	0	2	2	2	2	2	2	0	0	0	2	0	2	2	2	2	0	2	0	0	2	0	2	0	2	2	2	2	2	2	0	0	2	0	2	0	0	0	0	0	0	0	2	2	2	2	2	0
7A_621020692	0	0	2	2	2	2	2	2	0	0	0	2	0	2	2	2	2	0	2	0	0	2	0	2	0	2	2	2	2	2	2	0	0	2	0	2	0	0	0	0	0	0	0	2	2	2	2	2	0
7A_617110161	0	0	2	2	2	2	2	2	0	0	0	2	0	2	2	2	2	0	2	0	0	2	0	2	0	2	2	2	2	2	2	0	0	-1	0	2	0	0	0	0	0	0	0	2	2	2	2	2	0
7A_617666459	0	0	2	2	2	2	2	2	0	0	0	2	0	2	2	2	2	0	2	0	0	2	0	2	0	2	2	2	2	2	2	0	0	2	0	2	0	0	0	0	0	0	0	2	2	2	2	2	0
7A_606380038	0	0	2	2	2	2	2	2	0	0	0	2	0	2	2	2	2	0	2	0	0	2	0	2	0	2	2	2	2	2	2	0	0	2	0	2	0	0	0	0	0	0	0	2	2	2	2	2	0
7A_607579705	0	0	2	2	2	2	2	2	0	0	0	2	0	2	2	2	2	0	2	0	0	2	0	2	0	2	2	2	2	2	2	0	0	2	0	2	0	0	0	0	0	0	0	2	2	2	2	2	0
7A_606167915	0	0	2	2	2	2	2	2	0	0	0	2	0	2	2	2	2	0	2	0	0	2	0	2	0	2	2	2	2	2	2	0	0	2	0	2	0	0	0	0	0	0	0	2	2	2	2	2	0
7A_593861778	-1	0	2	2	2	2	2	2	0	-1	0	2	-1	2	2	2	2	0	2	0	0	2	0	-1	0	-1	2	2	2	2	2	0	0	-1	0	2	-1	0	0	-1	0	0	0	-1	2	2	2	2	-1
7A_581935791	0	0	2	2	2	2	2	2	0	0	0	2	0	2	2	2	2	0	2	0	0	2	0	2	0	2	2	2	2	2	2	0	0	2	0	2	0	0	0	0	0	0	0	2	2	2	2	2	0
7A_601518107	0	0	2	2	2	2	2	2	0	0	0	2	0	2	2	2	2	0	2	0	0	2	0	2	0	2	2	2	2	2	2	0	0	2	0	2	0	0	0	2	0	0	0	2	2	2	2	2	0
7A_581936018	0	0	2	2	2	2	2	2	0	0	0	2	0	2	2	2	2	0	2	0	0	2	0	2	0	2	2	2	2	2	2	0	0	2	0	2	0	0	0	0	0	0	0	2	2	2	2	2	0
7A_576135975	0	0	2	2	2	2	2	2	0	0	0	2	0	2	2	2	2	0	2	0	0	2	0	2	0	2	2	2	2	2	2	0	0	2	0	2	0	0	0	0	0	0	0	2	2	2	2	2	0
7A_576213487	0	0	2	2	2	2	2	2	0	0	0	2	0	2	2	2	2	0	2	0	0	2	0	2	0	2	2	2	2	2	2	0	0	2	0	2	0	0	0	0	0	0	0	2	2	2	2	2	0
7A_573662664	0	0	2	2	2	2	2	2	0	0	0	2	0	2	2	2	2	0	2	0	0	2	0	2	0	2	2	2	2	2	2	0	0	2	0	2	0	0	0	0	0	0	0	2	2	2	2	2	0
7A_561893210	0	0	2	2	2	2	2	2	0	0	0	2	0	2	2	2	2	0	2	0	0	2	0	2	0	2	2	2	2	2	2	0	0	2	0	2	0	0	0	0	0	0	0	2	2	2	2	2	0
7A_572235925	0	0	2	2	2	2	2	2	0	0	0	2	0	2	2	2	2	0	2	0	0	2	0	2	0	2	2	2	2	2	2	0	0	2	0	2	0	0	0	0	0	0	0	2	2	2	2	2	0
7A_545839357	0	0	2	2	0	2	2	2	0	0	0	2	0	2	2	2	2	0	2	0	0	2	0	2	0	2	2	2	2	2	2	0	0	2	0	2	0	0	0	0	0	0	0	2	2	2	2	2	0
7A_524255318	0	0	2	2	0	2	-1	2	0	0	0	2	0	2	2	2	2	0	2	0	0	2	0	-1	0	2	2	2	2	2	2	0	0	-1	0	2	0	0	0	0	0	0	0	2	2	2	2	2	0
7A_517681348	0	0	2	2	0	2	2	2	0	0	0	2	0	2	2	2	2	0	2	0	0	2	0	2	0	2	2	2	2	2	2	0	0	2	0	2	0	0	0	0	0	0	0	2	2	2	2	2	0
7A_517681374	0	0	2	2	0	2	2	2	0	0	0	2	0	2	2	2	2	0	2	0	0	2	0	2	0	2	2	2	2	2	2	0	0	2	0	2	0	0	0	0	0	0	0	2	2	2	2	2	0
7A_520838472	0	0	2	2	0	2	2	2	0	0	0	2	0	2	2	2	2	0	2	0	0	2	0	2	0	2	2	2	2	2	2	0	0	2	0	2	0	0	0	0	0	0	0	2	2	2	2	2	0
7A_490494414	0	0	2	2	0	2	2	2	0	0	0	0	0	2	2	2	2	0	2	0	0	2	0	2	0	2	2	2	2	2	2	0	0	2	0	2	0	0	0	0	0	0	0	0	2	2	2	2	0
7A_474279252	0	0	2	2	0	2	2	2	0	0	0	0	0	2	2	2	2	0	2	0	0	2	0	2	0	2	2	2	2	2	2	0	0	2	0	2	0	0	0	0	0	0	0	0	2	2	2	2	0
7A_373132230	0	0	2	2	0	2	2	2	0	0	0	0	0	2	2	2	2	0	2	0	0	2	0	2	0	2	2	2	2	2	2	0	0	2	0	2	0	0	0	0	0	0	0	2	2	2	2	2	0
7A_369067883	0	0	2	2	0	2	2	2	0	0	0	0	0	2	2	2	2	0	2	0	0	2	0	2	0	2	2	2	2	2	2	0	0	2	0	2	0	0	0	0	0	0	0	2	2	2	2	2	0
7A_336291493	0	0	2	2	0	2	2	2	0	0	0	0	0	2	2	2	2	0	2	0	0	2	0	2	0	2	2	2	2	2	2	0	0	2	0	2	0	0	0	0	0	0	0	2	2	2	2	2	0
7A_274008260	0	0	2	2	0	2	2	2	0	0	0	0	-1	2	2	2	2	0	2	0	0	2	0	-1	0	2	2	2	2	2	2	0	0	2	0	2	0	0	0	-1	0	0	0	2	2	2	2	2	0
7A_298640942	0	0	2	2	0	2	2	2	0	0	0	0	0	2	2	2	2	0	2	0	0	2	0	2	0	2	2	2	2	2	2	0	0	-1	0	2	0	0	0	0	0	0	0	2	2	2	2	2	0
7A_270627482	0	0	2	2	0	2	2	2	0	0	0	0	0	2	2	2	2	0	2	0	0	2	0	2	0	2	2	2	2	2	2	0	0	2	0	2	0	0	0	0	0	0	0	2	2	2	2	2	0
7A_243400784	0	0	2	2	0	2	2	2	0	0	0	0	0	2	2	2	2	0	2	0	0	2	0	2	2	2	2	2	2	2	2	0	0	2	0	2	0	0	0	0	0	0	0	2	2	2	2	2	0
7A_194880246	0	0	2	2	0	2	2	2	0	0	2	0	0	2	2	2	2	0	2	0	0	2	0	2	2	2	2	2	2	2	2	0	0	2	0	2	0	0	0	0	0	0	0	2	2	2	2	2	0
7A_209623517	0	0	2	2	0	2	-1	2	0	0	2	0	-1	2	2	2	2	0	2	0	0	2	0	-1	2	2	2	2	2	2	2	0	0	2	0	2	0	0	0	-1	0	0	0	2	2	2	2	2	-1
7A_191261406	0	0	2	2	0	2	2	2	0	0	2	0	0	2	2	2	2	0	2	0	0	2	0	-1	2	2	2	2	2	2	2	0	0	2	0	2	0	0	0	-1	0	0	0	2	2	2	2	2	0
7A_144391324	0	0	2	2	-1	2	2	2	0	-1	2	0	0	2	2	2	2	0	2	0	0	2	0	-1	2	2	2	2	2	2	2	0	0	2	0	2	0	0	0	2	0	0	0	2	2	2	2	2	0
7A_122768729	0	0	2	2	0	2	2	2	0	2	2	0	0	2	2	2	2	0	2	0	0	2	0	2	2	2	2	2	2	2	2	0	0	2	0	2	0	0	0	2	0	0	0	2	2	2	2	2	0
7A_126113361	0	0	2	2	0	2	2	2	0	2	2	0	0	2	2	2	2	0	2	0	0	2	0	2	2	2	2	2	2	2	2	0	0	2	0	2	0	0	0	2	0	0	0	2	2	2	2	2	0
7A_117861645	0	0	2	2	0	2	2	2	0	2	2	0	0	2	2	2	2	0	2	0	0	2	0	2	2	2	2	2	2	2	2	0	0	2	0	2	0	0	0	2	0	0	0	2	2	2	2	2	0
7A_109843429	0	0	2	2	0	2	2	2	0	2	2	0	0	2	2	2	2	0	2	0	0	2	0	2	2	2	2	2	2	2	2	0	0	-1	0	2	0	0	0	2	0	0	0	2	2	2	2	2	0
7A_101617032	0	0	2	2	0	2	2	2	0	2	2	0	0	2	2	2	2	0	2	0	0	2	0	2	2	2	2	2	2	2	2	0	0	2	0	2	0	0	0	2	0	0	0	2	2	2	2	2	0
7A_92745962	0	0	2	2	0	2	2	2	0	2	2	0	0	2	2	2	2	0	2	0	0	2	0	2	2	2	2	2	2	2	2	0	0	2	0	2	0	0	0	2	0	0	0	2	2	2	2	2	0
7A_87739396	0	0	2	2	0	2	2	2	0	2	2	0	0	2	2	2	2	2	2	0	0	2	0	2	2	2	2	2	2	0	2	0	0	2	0	2	0	0	0	2	0	0	2	2	2	2	2	2	0
7A_84244400	0	0	2	2	0	2	-1	2	0	2	2	0	0	2	2	2	2	2	2	0	0	2	0	2	2	2	2	2	2	0	2	0	0	-1	0	2	0	0	0	2	0	0	2	2	2	0	2	2	0
7A_82511750	0	0	2	2	0	2	2	2	0	2	2	0	0	2	2	2	2	2	2	0	0	2	0	2	2	2	2	2	2	0	2	0	0	2	0	2	0	0	0	2	0	0	2	2	2	0	2	2	0
7A_67672049	-1	-1	2	2	-1	2	2	2	0	-1	2	0	-1	0	2	2	2	2	2	0	-1	2	2	-1	2	2	-1	-1	2	-1	2	2	0	2	0	2	0	0	0	-1	0	0	2	2	2	0	2	2	-1
7A_66255188	0	0	2	2	0	2	2	2	0	2	2	0	0	0	2	2	2	2	2	0	0	2	2	2	2	2	2	2	2	0	2	2	0	2	0	2	0	0	0	2	0	0	2	2	2	0	2	2	0
7A_73832959	0	0	2	2	0	2	2	2	0	2	2	0	0	0	2	2	2	2	2	0	0	2	2	2	2	2	2	2	2	0	2	2	0	2	0	2	0	0	0	2	0	0	2	2	2	0	2	2	0
7A_49701013	0	0	2	0	0	0	2	2	0	2	0	0	0	0	2	2	2	2	2	0	0	2	2	2	2	2	2	2	2	0	0	2	0	0	0	2	0	0	0	2	0	0	0	2	2	0	0	2	0
7A_49568530	0	-1	2	0	0	0	2	2	0	2	0	0	0	0	2	2	2	2	2	0	0	2	2	2	2	2	2	2	2	0	0	2	0	0	0	2	0	0	0	2	0	0	0	2	2	0	0	2	0
7A_52327983	0	-1	2	0	0	0	2	2	0	2	0	0	0	0	2	2	2	2	2	0	0	2	2	2	2	2	2	2	2	0	0	2	0	0	0	2	0	0	0	2	0	0	0	2	2	0	0	2	0
7A_52327905	0	0	2	0	0	0	2	2	0	2	0	0	0	0	2	2	2	2	2	0	0	2	2	2	2	2	2	2	2	0	0	2	0	0	0	2	0	0	0	2	0	0	0	2	2	0	0	2	0
7A_52950071	0	0	2	0	0	0	2	2	0	2	0	0	0	0	2	2	2	2	2	0	0	2	2	2	2	2	2	2	2	0	0	2	0	-1	0	2	0	0	0	2	0	0	0	2	2	0	0	2	0
7A_52950108	0	0	2	0	0	0	2	2	0	2	0	0	0	0	2	2	2	2	2	0	0	2	2	2	2	2	2	2	2	0	0	2	0	-1	0	2	0	0	0	2	0	0	0	2	2	0	0	2	0
7A_47338513	0	0	2	0	0	0	2	2	0	2	0	0	2	0	2	2	2	2	2	0	0	2	2	2	2	2	2	2	2	0	0	0	0	0	0	2	2	2	0	2	0	0	0	2	2	0	0	2	0
7A_41788909	0	0	2	0	0	0	2	2	0	2	0	0	2	0	2	2	0	2	2	0	2	2	2	2	2	2	2	2	2	0	0	0	0	0	0	2	2	2	0	2	0	0	0	2	2	0	0	2	0
7A_42775703	0	0	2	0	0	0	2	2	0	2	0	0	2	0	2	2	0	2	2	0	2	2	2	2	2	2	2	2	2	0	0	0	0	0	0	2	2	2	0	2	0	0	0	2	2	0	0	2	0
7A_36851806	0	0	2	0	0	2	-1	2	0	2	0	0	2	0	2	2	0	2	2	0	2	2	2	2	2	2	2	2	2	0	0	0	0	0	0	2	2	2	0	2	0	0	0	2	2	0	0	2	0
7A_36887619	0	-1	2	0	0	2	2	2	0	2	0	0	2	0	2	2	0	2	2	0	2	2	2	2	2	2	2	2	2	0	0	0	0	-1	-1	2	2	2	0	2	0	0	0	2	2	0	0	2	0
7A_36181599	0	0	2	0	0	2	2	2	0	2	0	0	2	0	2	2	0	0	2	0	2	2	2	2	2	2	2	2	2	0	0	0	0	0	0	2	2	2	0	2	0	0	0	2	2	0	0	2	0
7A_32626994	0	0	2	0	0	2	2	2	0	2	0	0	2	0	2	0	0	0	2	0	2	2	2	2	2	2	2	2	2	0	0	2	2	0	0	2	2	2	0	2	0	0	0	2	2	0	0	2	0
7A_32043888	-1	0	2	0	0	2	2	2	0	-1	0	0	2	0	2	0	0	0	2	0	2	2	2	-1	2	2	2	-1	2	0	0	2	2	-1	0	2	2	2	0	-1	0	0	0	2	2	0	0	2	-1
7A_27622667	0	0	2	0	0	2	0	2	0	2	0	0	2	2	2	0	0	0	2	0	2	2	2	2	2	0	2	2	2	0	0	2	2	2	0	2	2	0	0	2	0	0	2	2	2	0	0	2	2
7A_27622598	0	0	2	0	0	2	0	2	0	2	0	0	2	2	2	0	0	0	2	0	2	2	2	2	2	0	2	2	2	0	0	2	2	2	0	2	2	0	0	2	0	0	2	2	2	0	0	2	2
7A_26420325	0	0	2	0	0	2	0	2	0	2	0	0	2	2	2	0	0	0	2	0	2	2	2	2	2	0	2	2	2	0	0	2	2	2	0	2	2	0	0	2	0	0	0	2	2	0	0	2	2
7A_23813800	0	0	2	0	0	2	0	2	0	2	0	0	2	2	2	0	0	0	2	0	2	2	2	2	2	0	2	2	2	0	0	2	2	2	0	2	2	0	0	2	0	0	0	2	2	0	0	2	2
1D_442448464	2	2	2	0	2	2	0	0	0	0	0	0	2	2	2	2	0	2	2	0	2	0	0	2	0	2	0	0	2	0	0	0	0	0	2	2	2	2	2	0	2	0	2	0	0	2	0	0	0
1D_426415954	2	2	2	0	2	2	0	0	0	0	0	0	2	2	2	2	0	2	2	0	0	0	0	2	0	2	0	0	2	0	0	0	0	0	2	2	2	2	2	0	2	0	2	0	0	2	0	2	0
1D_412164185	2	2	2	0	2	2	0	0	0	0	0	0	2	2	2	2	0	2	2	0	0	0	0	2	0	2	0	0	2	0	0	0	0	0	2	2	2	2	2	0	2	0	2	0	0	2	0	2	0
1D_415059649	2	2	2	0	2	2	0	0	0	-1	0	0	2	2	2	2	0	2	2	0	0	0	0	2	0	2	0	0	2	0	0	0	0	-1	2	2	2	2	2	-1	2	0	2	0	-1	2	0	2	-1
1D_409350015	2	2	2	0	2	2	0	0	0	0	0	0	2	2	2	2	0	2	2	0	0	0	0	2	0	2	0	0	2	0	0	0	0	0	2	2	2	2	2	0	2	0	2	0	0	2	0	2	0
1D_408457225	2	2	2	0	2	2	0	0	0	0	0	0	2	2	2	2	0	2	2	0	0	0	0	2	0	2	0	0	2	0	0	0	0	0	2	2	2	2	2	0	2	0	2	0	0	2	0	2	0
1D_415709519	2	2	2	0	2	2	0	0	0	0	0	0	2	2	2	2	0	2	2	0	0	0	0	2	0	0	0	0	2	0	0	0	0	0	2	2	2	2	2	0	2	0	2	0	0	2	0	2	0
1D_396164871	2	2	2	0	2	2	0	0	0	0	0	0	2	2	2	2	0	2	2	0	0	0	0	2	0	0	0	0	2	0	0	0	0	0	2	2	2	0	2	0	2	0	2	0	0	2	0	2	0
1D_340550117	2	2	2	0	2	2	0	0	0	0	0	0	2	2	2	2	0	2	2	0	0	0	0	2	0	0	0	0	2	0	0	0	0	0	2	2	2	0	2	2	2	0	2	0	0	2	0	2	0
1D_326562137	2	2	2	0	2	2	0	0	0	0	0	0	2	2	2	2	0	2	2	0	0	0	0	2	0	0	0	0	2	0	0	0	0	0	2	2	2	0	2	2	2	0	2	0	0	2	0	2	0
1D_311892317	2	2	2	0	2	2	0	0	0	0	0	0	2	2	2	2	0	2	2	0	0	0	0	2	0	0	0	0	2	0	0	0	0	0	2	2	2	0	2	2	2	0	2	0	0	2	0	2	0
1D_277662625	2	2	2	0	2	2	0	0	0	0	0	0	2	2	2	2	0	2	2	0	0	0	0	2	0	0	0	0	2	0	2	0	0	0	2	2	2	0	2	2	2	0	2	0	0	2	2	2	0
1D_273888237	2	2	2	0	2	2	0	0	0	0	0	0	2	2	2	2	0	2	2	0	0	0	0	2	0	0	0	0	2	0	2	0	0	0	2	2	2	0	2	2	2	0	2	0	0	2	2	2	0
1D_297773796	2	2	2	0	2	2	0	0	0	0	0	0	2	2	2	2	0	2	2	0	0	0	0	2	0	0	0	0	2	0	0	0	0	0	2	2	2	0	2	2	2	0	2	0	0	2	0	2	0
1D_260832917	2	2	2	0	2	2	0	0	0	0	0	0	2	2	2	2	0	2	2	0	0	0	0	2	0	0	0	0	2	0	2	0	0	0	2	2	2	0	2	2	2	0	2	0	0	2	2	2	0
1D_232999069	2	2	2	0	2	2	0	0	0	0	0	0	2	2	2	2	0	2	2	0	0	0	0	2	0	0	2	0	2	0	2	0	0	0	2	2	2	0	2	2	2	0	2	0	0	2	2	2	0
1D_252822346	2	2	2	0	2	2	0	0	0	0	0	0	2	2	2	2	0	2	2	0	0	0	0	2	0	0	2	0	2	0	2	0	0	0	2	2	2	0	2	2	2	0	2	0	0	2	2	2	0
1D_205282921	2	2	2	0	2	2	0	0	0	0	0	0	2	2	2	2	0	2	2	0	0	0	0	2	0	0	2	0	2	0	2	0	0	0	2	2	2	0	2	2	2	0	0	0	0	2	2	2	0
1D_154575895	2	2	2	0	2	2	0	0	0	0	0	0	2	2	2	2	0	2	2	0	0	0	0	2	0	2	2	0	2	0	2	0	0	0	2	2	2	0	2	2	2	0	0	0	0	2	2	2	0
1D_188903918	2	2	2	0	2	2	0	0	0	0	0	0	2	2	2	2	0	2	2	0	0	0	0	2	0	2	2	0	2	0	2	0	0	0	2	2	2	0	2	2	2	0	0	0	0	2	2	2	0
1D_75547610	2	2	2	-1	2	2	0	0	0	0	0	0	2	-1	2	2	0	2	2	0	0	0	0	-1	0	2	2	0	-1	0	2	0	0	-1	2	2	2	0	2	-1	2	0	0	-1	0	2	2	2	-1
1D_47583271	2	2	2	0	2	2	0	0	0	0	0	0	2	2	2	2	0	2	2	0	0	0	0	2	0	2	2	0	2	0	2	0	0	0	2	2	2	0	2	2	2	0	0	0	0	2	2	2	0
1D_32760206	2	2	2	0	2	2	0	0	0	0	0	0	2	2	2	2	0	2	2	0	0	0	0	2	0	2	2	0	2	0	2	0	0	-1	2	2	2	0	2	2	2	0	0	0	0	2	2	2	0
1D_38382310	2	2	2	0	2	2	0	0	0	0	0	0	2	2	2	2	0	2	2	0	0	0	0	2	0	2	2	0	2	0	2	0	0	0	2	2	2	0	2	2	2	0	0	0	0	2	2	2	0
1D_37948732	2	2	2	0	2	2	0	0	0	-1	0	0	2	2	2	2	0	2	2	0	0	0	0	-1	0	2	2	0	2	0	2	0	0	0	2	2	2	0	2	2	2	0	0	0	0	2	2	2	2
1D_36316537	2	2	2	0	2	2	0	0	0	0	0	0	-1	2	2	2	0	2	2	0	0	0	0	-1	0	2	2	0	2	0	2	0	0	0	2	2	2	0	2	2	2	0	0	0	0	2	2	2	-1
1D_35569492	2	2	2	0	2	2	0	0	0	0	0	0	2	2	2	2	0	2	2	0	0	0	0	2	0	2	2	0	2	0	2	0	0	0	2	2	2	0	2	2	2	0	0	0	0	2	2	2	0
1D_28481415	2	2	2	0	2	2	0	0	0	0	0	0	2	2	2	2	0	2	2	0	0	0	0	2	0	0	2	0	2	0	2	0	0	0	2	2	2	0	2	2	2	0	0	0	0	2	2	2	0
1D_28691089	2	2	2	0	2	2	0	0	0	0	0	0	2	2	2	2	0	2	2	0	0	0	0	2	0	0	2	0	2	0	2	0	0	0	2	2	2	0	2	2	2	0	0	0	0	2	2	2	0
1D_21540340	2	2	2	0	2	2	0	0	0	0	2	0	2	2	2	2	0	2	2	0	0	0	0	2	0	0	2	0	2	0	2	0	0	0	2	2	2	0	2	2	2	0	0	0	0	2	2	2	0
1D_20050112	2	2	2	0	2	2	0	0	0	0	2	0	2	2	2	2	0	2	2	0	0	0	0	2	0	2	2	0	2	0	2	0	0	0	2	2	2	0	2	2	2	0	0	0	0	2	2	2	0
1D_18751283	2	2	2	0	2	2	0	0	0	0	2	0	2	2	2	2	0	2	2	0	0	0	0	2	0	2	2	0	2	0	2	0	0	0	2	2	2	0	2	2	2	0	0	0	0	2	2	2	0
1D_16826259	2	2	2	0	2	2	0	0	0	0	2	0	2	2	2	2	0	2	2	0	0	0	0	2	0	2	2	0	2	0	2	2	0	0	2	2	2	0	2	2	2	0	2	0	0	2	2	2	0
1D_15325436	2	2	2	0	2	2	0	0	0	0	2	0	2	2	2	2	0	2	2	0	0	0	0	2	0	0	2	0	2	0	2	2	0	0	2	2	2	0	2	2	2	0	2	0	0	2	2	2	0
1D_14485343	2	2	2	0	2	2	0	0	0	0	2	0	2	2	2	2	0	2	2	0	0	0	2	2	0	0	2	0	2	0	2	2	0	0	2	2	2	0	2	2	2	0	2	0	0	2	2	2	0
1D_12332040	2	2	2	0	2	2	0	0	0	0	2	0	2	2	2	2	0	2	2	0	0	0	2	2	0	0	2	0	2	0	2	2	0	0	2	2	2	0	2	2	2	0	2	0	0	2	2	2	0
1D_35786142	2	0	2	0	2	0	0	0	0	0	0	0	2	0	2	2	0	-1	2	0	0	0	0	0	0	2	2	0	2	0	2	0	0	0	0	2	2	0	2	-1	2	0	0	0	0	2	2	2	0
1D_35786110	2	0	2	0	2	0	0	0	0	0	0	0	2	0	2	2	0	-1	2	0	0	0	0	2	0	2	2	0	2	0	2	0	0	0	0	2	2	0	2	-1	2	0	0	0	0	2	2	0	0
4B_6640496	0	2	2	0	2	2	0	2	0	2	0	2	2	2	0	2	2	0	2	0	2	2	2	2	2	2	0	2	2	0	2	2	2	0	0	2	2	0	2	2	0	2	2	0	0	0	2	2	2
4B_6640454	0	2	2	0	2	2	0	2	0	2	0	2	2	2	0	2	2	0	2	0	2	2	2	2	2	2	0	2	2	0	2	2	2	0	0	2	2	0	2	2	0	2	2	0	0	0	2	2	2
4B_12620354	0	0	2	0	2	2	0	2	0	2	0	0	2	2	0	2	2	0	0	0	2	0	2	2	2	2	0	2	2	0	2	2	2	0	0	2	2	0	2	2	0	2	2	0	0	0	2	2	2
4B_17237687	2	0	2	0	2	2	0	2	0	2	0	0	2	2	0	2	2	0	0	0	2	0	2	2	2	2	0	2	2	0	2	2	2	0	0	2	2	0	2	2	0	2	2	0	0	0	2	2	2
4B_20561640	2	0	2	0	2	2	0	2	0	2	0	0	2	2	0	2	2	0	0	0	2	0	2	0	2	2	0	2	2	0	2	2	2	0	0	2	2	0	2	2	2	2	2	0	0	0	2	2	2
4B_28739948	2	0	2	0	2	2	0	2	2	2	0	0	0	2	0	2	2	0	0	0	2	0	2	0	2	2	2	2	2	2	2	2	2	-1	2	2	2	0	2	2	2	2	2	0	-1	0	2	2	2
4B_32174875	2	0	2	0	2	2	0	2	2	2	0	0	0	2	0	2	2	0	0	0	2	0	2	0	2	2	2	2	2	2	2	2	2	0	2	2	2	0	2	2	2	2	2	0	0	0	2	2	2
4B_37764579	2	0	2	0	2	2	0	2	2	2	0	0	0	2	0	2	2	0	0	0	2	0	2	0	2	2	2	2	2	2	2	2	2	-1	2	2	2	0	2	2	2	2	2	0	0	0	2	2	2
4B_37696493	2	0	2	0	2	2	0	2	2	2	0	0	0	2	0	2	2	0	0	0	2	0	2	0	2	2	2	2	2	2	2	2	2	0	2	2	2	0	2	2	2	2	2	0	0	0	2	2	2
4B_277277994	2	0	2	0	2	2	0	2	2	2	0	0	2	2	0	2	2	0	0	0	2	0	2	0	2	2	2	2	2	2	2	2	2	0	2	2	2	0	2	2	2	2	2	0	0	0	2	2	2
4B_454527626	2	0	2	0	2	2	0	2	2	2	0	0	2	2	0	2	2	0	0	0	2	0	2	0	2	2	2	2	2	2	2	2	2	0	2	2	2	0	2	2	2	2	2	0	0	0	2	2	2
4B_442665024	2	0	2	0	2	2	0	2	2	2	0	0	2	2	0	2	2	0	0	0	2	0	2	0	2	2	2	2	2	2	2	2	2	0	2	2	2	0	2	2	2	2	2	0	0	0	2	2	2
4B_435412794	2	0	2	0	2	2	0	2	2	2	0	0	2	2	0	2	2	0	0	0	2	0	2	0	2	2	2	2	2	2	2	2	2	0	2	2	2	0	2	2	2	2	2	0	0	0	2	2	2
4B_433456547	2	0	2	0	2	2	0	2	2	2	0	0	2	2	0	2	2	0	0	0	2	0	2	0	2	2	2	2	2	2	2	2	2	0	2	2	2	0	2	2	2	2	2	0	0	0	2	2	2
4B_428180567	2	0	2	0	2	2	0	2	2	2	0	0	2	2	0	2	2	0	0	0	2	0	2	0	2	2	2	2	2	2	2	2	2	0	2	2	2	0	2	2	2	2	2	0	0	0	2	2	2
4B_427062234	-1	0	2	0	-1	2	0	2	2	-1	0	0	-1	-1	0	2	2	0	0	0	2	0	2	0	2	2	2	2	-1	2	-1	2	-1	0	-1	-1	2	0	-1	-1	2	2	2	0	0	0	2	2	-1
4B_483052516	-1	0	2	0	-1	2	0	2	2	2	0	0	2	2	0	2	2	2	0	0	2	0	2	0	2	2	2	2	0	2	2	2	2	0	0	2	2	0	2	2	2	2	2	0	0	0	2	2	2
4B_487859313	2	0	2	0	2	2	0	2	2	2	0	0	2	2	0	2	2	2	0	0	2	0	2	0	2	2	2	2	0	2	2	2	2	0	0	2	2	0	2	2	2	2	2	0	0	0	2	2	2
4B_515175803	2	0	2	0	2	0	0	2	2	2	0	0	2	2	0	2	2	2	0	0	2	0	2	0	2	2	2	2	0	2	2	2	2	-1	0	2	2	0	2	2	2	2	2	0	0	0	2	2	2
4B_494243528	2	0	2	0	2	2	0	2	2	2	0	0	2	2	0	2	2	2	0	0	2	0	2	0	2	2	2	2	0	2	2	2	2	0	0	2	2	0	2	2	2	2	2	0	0	0	2	2	2
4B_500399496	2	0	2	0	2	2	0	2	2	2	0	0	2	2	0	2	2	2	0	0	2	0	2	0	2	2	2	2	0	2	2	2	2	0	0	2	2	0	2	2	2	2	2	0	0	0	2	2	2
4B_530006835	2	0	2	0	2	0	0	2	2	2	0	0	2	2	0	2	2	2	0	0	2	0	2	0	2	2	2	2	0	2	2	2	2	2	0	2	2	0	2	2	2	2	2	0	0	0	2	2	2
4B_596221955	2	0	2	0	2	0	0	2	2	2	0	0	2	2	0	2	2	2	0	0	2	0	2	0	2	2	2	2	0	2	2	2	2	2	0	2	2	0	2	2	2	0	2	0	0	0	2	2	2
4B_539005009	2	0	2	0	2	0	0	2	2	2	0	0	2	2	0	2	2	2	0	0	2	0	2	0	2	2	2	2	0	2	2	2	2	2	0	2	2	0	2	2	2	0	2	0	0	0	2	2	2
4B_596221948	2	0	2	0	2	0	0	2	2	2	0	0	2	2	0	2	2	2	0	0	2	0	2	0	2	2	2	2	0	2	2	2	2	2	0	2	2	0	2	2	2	0	2	0	0	0	2	2	2
4B_570246805	2	0	2	0	2	0	0	2	2	2	0	0	2	2	0	2	2	2	0	0	2	0	2	0	2	2	2	2	0	2	2	2	2	2	0	2	2	0	2	2	2	0	2	0	0	0	2	2	2
4B_600286935	2	0	2	0	2	0	0	2	2	2	0	0	2	2	0	2	2	2	0	0	2	0	2	0	2	2	2	2	0	2	2	2	2	2	0	2	2	0	2	2	2	0	2	0	0	0	2	2	2
4B_570190409	2	0	2	0	2	0	0	2	2	2	0	0	2	2	0	2	2	2	0	0	2	0	2	0	2	2	2	2	0	2	2	2	2	-1	0	2	2	0	2	2	2	0	2	0	0	0	2	2	2
4B_604888524	2	0	2	0	2	0	0	2	2	2	0	0	2	2	0	2	2	2	0	0	2	0	2	0	2	2	2	2	0	2	2	2	2	2	0	2	2	0	2	2	2	0	2	0	0	0	2	2	2
4B_612486206	2	0	2	0	2	0	0	2	2	2	0	0	2	2	0	2	2	2	0	0	2	0	2	0	2	2	2	2	0	2	2	2	2	2	0	2	2	0	2	2	2	0	2	0	0	0	2	2	2
4B_618329284	2	-1	2	-1	2	0	0	2	2	2	-1	-1	2	2	0	2	2	2	0	-1	2	0	2	0	2	2	2	2	0	2	-1	2	2	2	0	2	2	0	2	2	2	0	2	-1	0	-1	2	2	2
4B_618027704	2	0	2	0	2	0	0	2	2	2	0	0	2	2	0	2	2	2	0	0	2	0	2	0	2	2	2	2	0	2	2	2	2	2	0	2	2	0	2	2	2	0	2	0	0	0	2	2	2
4B_621666683	2	0	2	0	2	0	0	2	2	2	0	0	2	2	0	2	2	2	0	0	2	0	2	0	2	2	2	2	0	2	2	2	2	2	0	2	2	0	2	2	2	0	2	0	-1	0	2	2	2
4B_621946172	2	0	2	0	2	0	0	2	2	2	0	0	2	2	0	2	2	2	0	0	2	0	2	0	2	2	2	2	0	2	2	2	2	2	0	2	2	0	2	2	2	0	2	0	0	0	2	2	2
4B_621814323	2	0	2	0	2	0	0	2	2	2	0	0	2	2	0	2	2	2	0	0	2	0	2	-1	2	2	2	2	0	2	2	2	2	2	0	2	2	0	2	2	2	0	2	0	0	0	2	2	-1
4B_628646285	2	0	2	0	2	0	0	2	2	2	0	0	2	2	0	2	2	2	0	0	2	0	2	0	2	2	2	2	0	2	2	2	2	2	0	2	2	0	2	2	2	0	2	0	0	0	2	2	2
4B_638956287	2	0	2	0	2	0	0	2	2	2	2	0	2	0	0	2	2	2	0	0	2	0	2	0	2	2	2	2	0	2	2	2	2	2	0	2	2	0	2	2	2	0	2	0	0	0	2	2	2
4B_642460586	2	0	2	0	2	0	0	2	0	2	2	0	2	0	0	2	2	2	0	0	2	0	2	0	2	2	2	2	0	2	2	2	2	2	0	2	2	0	2	2	2	0	2	0	0	0	2	2	2
4B_639958288	2	0	2	0	2	0	0	2	0	2	2	0	2	0	0	2	2	2	0	0	2	0	2	0	2	2	2	2	0	2	2	2	2	2	0	2	2	0	2	2	2	0	2	0	0	0	2	2	2
4B_644355552	2	0	2	0	2	0	0	2	0	2	2	0	2	0	0	2	2	2	0	0	2	0	2	0	2	2	2	2	0	2	2	2	2	2	0	2	0	0	2	2	2	0	2	0	0	0	2	2	2
4B_649491388	2	0	0	0	2	0	0	2	0	2	2	0	2	0	0	2	0	2	0	0	2	0	2	0	2	2	2	2	0	2	2	2	2	-1	0	2	0	0	2	2	2	0	2	2	0	0	2	2	2
4B_648178224	2	0	0	0	2	0	0	2	0	2	2	0	2	0	0	2	0	2	0	0	2	0	2	0	2	2	2	2	0	2	2	2	2	2	0	2	0	0	2	2	2	0	2	2	0	0	2	2	2
4B_648943218	2	0	0	0	2	0	0	2	0	2	2	0	2	0	0	2	0	2	0	0	2	0	2	0	2	2	2	2	0	2	2	2	2	-1	0	2	0	0	2	2	2	0	2	2	0	0	2	2	2
4B_649491289	2	0	0	0	2	0	0	2	0	2	2	0	2	0	0	2	0	2	0	0	2	0	2	0	2	0	2	2	0	2	2	2	2	2	0	2	0	0	2	2	2	0	2	2	0	0	2	2	2
4B_652391549	2	0	0	0	2	0	0	2	0	2	2	0	0	0	2	2	0	2	0	0	2	0	2	0	2	2	2	2	0	2	2	2	2	2	0	2	0	0	2	2	2	0	2	2	0	0	2	0	0
4B_654044576	2	0	0	0	2	0	0	2	0	2	2	0	0	0	2	2	0	2	2	0	2	0	2	2	2	2	2	2	0	2	2	2	2	2	0	2	0	0	2	2	0	0	2	2	2	0	2	0	0
4B_654436643	2	0	0	0	2	0	0	2	0	2	2	0	0	0	2	2	0	2	2	0	2	0	2	2	2	0	2	2	0	2	2	2	2	2	0	2	0	0	2	2	0	0	2	2	2	0	2	0	0
4B_658157524	2	0	0	0	2	0	0	2	0	2	2	0	0	0	2	2	0	2	2	0	2	2	2	2	2	0	2	2	0	0	2	2	2	2	0	2	0	0	0	2	0	0	2	2	2	0	2	0	0
4B_664193838	2	0	0	0	2	0	2	2	0	0	2	0	0	0	2	2	0	0	0	0	2	2	2	2	2	2	2	2	0	0	2	2	2	0	0	0	0	0	0	2	0	0	2	0	2	0	2	0	0
4B_665940126	2	0	0	0	2	0	2	0	0	0	2	0	0	0	2	2	0	0	0	0	2	2	2	2	2	2	2	2	0	0	2	2	2	0	0	0	0	0	0	2	0	0	2	0	2	0	2	0	0
4B_665939977	2	0	0	0	2	0	2	0	0	-1	2	0	-1	0	2	2	0	0	0	0	2	2	2	2	2	2	2	2	0	0	2	2	2	0	0	0	-1	0	0	-1	0	0	2	0	2	0	2	0	-1
2A_764274734	0	0	2	2	2	0	2	2	0	2	0	2	2	2	0	0	2	0	2	2	2	2	2	2	0	2	2	2	2	2	0	2	2	2	0	2	2	2	0	0	0	0	0	2	0	2	0	0	0
2A_764273453	0	0	2	2	2	0	2	2	0	2	0	2	2	2	0	0	2	0	2	2	2	2	2	2	0	2	2	2	2	2	0	2	2	2	0	2	2	2	0	0	0	0	0	2	0	2	0	0	0
2A_768720603	0	0	2	2	0	0	2	2	0	2	0	2	2	2	0	0	2	0	2	2	2	2	2	2	0	2	2	2	2	2	0	2	2	2	0	2	2	2	0	0	0	0	0	2	0	2	0	0	0
2A_770248428	0	0	2	2	0	0	2	2	0	2	0	2	2	2	2	0	2	0	2	2	2	2	2	2	0	2	2	2	2	2	0	2	2	-1	0	2	2	2	0	0	0	0	0	2	0	2	0	0	0
2A_776552905	0	0	2	2	0	0	0	2	0	2	0	2	2	2	2	2	2	0	2	2	0	2	2	2	2	2	2	2	2	2	0	2	2	0	0	2	2	2	0	0	0	0	0	2	0	2	0	0	0
2A_756493154	0	0	2	2	0	0	0	2	2	0	2	2	2	2	0	2	0	0	2	2	0	2	2	2	2	0	2	2	2	2	0	2	0	0	0	2	2	2	0	0	0	0	0	2	0	2	0	2	0
2A_756911623	0	-1	2	2	0	0	0	2	2	0	2	2	2	2	0	2	0	0	2	2	0	2	2	2	2	0	2	2	2	2	0	2	0	0	0	2	2	2	0	-1	0	2	0	2	0	2	0	2	0
2A_755718924	0	-1	2	2	0	0	0	2	2	0	2	2	2	2	0	2	0	0	2	2	0	2	2	2	2	0	2	2	2	0	0	2	0	0	0	2	2	2	0	0	0	2	0	2	0	2	0	2	0
2A_750201681	0	0	2	2	0	0	0	2	2	0	2	2	2	2	0	2	0	0	2	2	0	0	2	2	2	2	2	2	2	0	0	2	0	0	0	2	2	2	0	0	0	2	0	2	0	2	0	2	0
2A_749035558	0	0	2	2	0	0	0	2	2	0	2	2	2	2	0	2	0	0	2	2	0	0	2	2	2	-1	2	2	2	0	0	2	0	0	0	2	2	2	0	0	0	2	0	2	0	2	0	2	0
2A_747084727	0	0	2	2	0	0	0	2	2	0	2	2	2	2	0	2	0	0	2	2	0	0	2	2	2	2	2	2	2	0	0	2	0	0	0	2	2	2	0	0	0	2	0	2	0	2	0	2	0
2A_741230483	0	0	2	2	0	0	0	2	2	0	2	2	2	2	0	2	2	0	2	2	0	0	2	2	2	2	2	2	2	0	0	2	0	0	0	2	2	2	0	0	0	2	0	2	0	2	0	2	0
2A_738029301	0	0	2	2	0	0	0	2	2	-1	2	2	-1	2	0	2	2	0	2	2	2	0	2	-1	2	2	2	-1	2	0	0	2	0	0	0	2	-1	2	0	-1	0	2	0	2	0	2	0	0	-1
2A_734711927	0	-1	2	0	0	0	0	2	2	0	2	0	2	2	0	2	2	0	2	2	2	0	2	-1	2	2	2	2	2	0	0	2	0	-1	0	2	2	2	0	0	0	2	-1	2	0	2	0	0	-1
2A_734756744	0	0	2	0	0	0	0	2	2	0	2	0	2	2	0	2	2	0	2	2	2	0	2	2	2	2	2	2	2	0	0	2	0	0	0	2	2	2	0	0	0	2	0	2	0	2	0	0	0
2A_726132029	0	0	2	0	0	2	0	2	2	0	2	0	2	2	0	2	2	0	2	2	2	0	0	2	2	2	2	2	2	0	0	2	0	0	0	2	2	2	0	0	0	2	-1	2	2	2	0	0	0
2A_704055774	0	0	2	0	0	2	2	2	2	0	2	0	2	2	0	2	2	0	2	2	2	0	0	2	2	2	2	2	2	2	0	2	0	0	0	2	0	2	0	0	0	0	-1	2	2	2	0	0	0
2A_704892430	0	0	2	0	0	2	-1	2	2	0	2	0	2	2	0	2	2	0	2	2	2	0	0	2	2	2	2	2	2	2	0	2	0	0	0	2	0	2	0	0	0	0	-1	2	2	2	0	0	0
2A_705318801	0	0	2	0	0	2	2	2	2	0	2	0	2	2	0	2	2	0	2	2	2	0	0	2	2	2	2	2	2	2	0	2	0	0	0	2	0	2	0	0	0	0	-1	2	2	2	0	0	0
2A_703864960	0	0	2	0	0	2	2	2	2	0	2	0	2	2	0	2	2	0	2	2	2	0	0	2	2	2	2	2	2	2	0	2	0	0	0	2	0	2	0	0	0	0	-1	2	2	2	0	0	0
2A_702061597	0	-1	2	0	0	2	2	2	2	0	2	0	2	2	0	2	2	0	2	2	2	0	0	2	2	2	2	2	2	2	0	2	0	0	0	2	0	2	0	0	0	0	-1	2	2	2	0	0	0
2A_698910094	0	0	2	0	2	2	2	2	2	0	2	0	2	2	0	2	2	0	2	2	2	0	0	2	2	2	2	2	2	2	0	2	0	0	0	2	0	2	0	0	0	0	-1	2	2	2	0	0	0
2A_698910190	0	0	2	0	2	2	2	2	2	0	2	0	2	2	0	2	2	0	2	2	2	0	0	2	2	2	2	2	2	2	0	2	0	0	0	2	0	2	0	0	0	0	-1	2	2	2	0	0	0
2A_692327933	0	0	2	0	2	2	2	2	2	0	2	0	2	2	0	2	2	0	2	2	2	0	0	2	2	2	2	2	2	2	0	2	0	0	0	2	0	2	0	0	0	0	-1	2	2	2	0	0	0
2A_690534124	0	0	2	0	2	2	2	2	2	0	2	0	2	2	0	2	2	0	2	2	2	0	0	2	2	2	2	2	2	2	0	2	0	0	0	2	0	2	0	0	0	0	0	2	2	2	0	0	0
2A_693376329	0	0	2	0	2	2	2	2	2	0	2	0	2	2	0	2	2	0	2	2	2	0	0	2	2	0	2	2	2	2	0	2	0	0	0	2	0	2	0	0	0	0	-1	2	2	2	0	0	0
2A_693376236	0	0	2	0	2	2	2	2	2	0	2	0	2	2	0	2	2	0	2	2	2	0	0	2	2	0	2	2	2	2	0	2	0	0	0	2	0	2	0	0	0	0	-1	2	2	2	0	0	0
2A_696008618	0	0	2	0	2	2	2	2	2	0	2	0	2	2	0	2	2	0	2	2	2	0	0	2	2	2	2	2	2	2	0	2	0	0	0	2	0	2	0	0	0	0	-1	2	2	2	0	0	0
2A_696393785	0	0	2	0	2	2	-1	2	2	0	2	0	2	2	0	2	2	0	2	2	2	0	0	2	2	2	2	2	2	2	0	2	0	0	0	2	0	2	0	0	0	0	0	2	2	2	0	0	0
2A_659575006	0	0	0	0	2	2	2	2	0	2	2	0	2	2	0	2	2	0	2	2	2	0	0	-1	2	2	2	2	2	2	0	2	0	0	0	2	0	2	0	0	0	0	2	2	2	2	0	0	0
2A_636896810	0	-1	0	0	2	2	2	2	0	2	2	0	2	2	0	2	2	0	2	2	2	0	0	2	2	2	2	2	2	2	0	2	0	0	0	2	0	2	0	0	0	0	2	2	2	2	0	0	0
2A_663328967	0	0	0	0	2	2	2	2	0	2	2	0	2	2	0	2	2	0	2	2	2	0	0	2	2	0	2	2	2	2	0	2	0	0	0	2	0	2	0	0	0	0	2	2	2	2	0	0	0
2A_631788025	0	0	0	0	2	2	2	2	0	2	2	0	2	2	0	2	2	0	2	2	2	0	0	2	2	0	2	2	2	2	0	2	0	0	0	2	0	2	0	0	0	0	2	2	2	2	0	0	0
2A_561241398	0	0	0	0	2	2	2	2	0	2	0	0	2	2	0	2	2	0	2	2	2	0	0	2	2	0	0	2	2	2	0	2	0	0	0	2	0	2	0	0	0	2	0	2	2	2	0	0	0
2A_564267619	0	0	0	0	2	2	2	2	0	2	0	0	2	2	0	2	2	0	2	2	2	0	0	2	2	0	0	2	2	2	0	2	0	0	0	2	0	2	0	0	0	2	0	2	2	2	0	0	0
2A_545228903	0	0	0	0	2	2	2	2	0	2	0	0	0	2	0	2	2	0	2	2	2	0	0	2	2	0	0	2	2	2	0	2	0	0	0	2	0	2	0	0	0	2	-1	2	2	2	0	0	0
2A_571153803	0	0	0	0	2	2	2	2	0	2	0	0	0	2	0	2	2	0	2	2	2	0	0	2	2	0	0	2	2	2	0	2	0	0	0	2	0	2	0	0	0	2	-1	2	2	2	0	0	0
2A_578369827	0	0	0	0	2	2	2	2	0	2	0	0	0	2	0	2	2	0	2	2	2	0	0	2	2	2	0	2	2	2	0	2	0	0	0	2	0	2	0	0	0	2	-1	2	2	2	0	0	0
2A_75881775	0	0	0	0	2	0	2	2	0	2	0	0	2	2	0	0	2	0	2	2	2	0	0	2	2	2	0	2	2	2	0	2	0	0	0	2	0	2	0	0	0	2	0	2	2	2	0	0	0
2A_73549025	0	0	0	0	2	0	-1	2	0	2	0	0	2	2	0	0	2	0	2	2	2	0	0	2	2	2	0	2	2	2	0	2	0	0	0	2	0	2	0	0	0	2	-1	2	2	2	0	0	0
2A_71082632	0	0	0	0	2	0	2	2	0	2	0	0	2	2	0	0	2	0	2	2	2	0	0	2	2	0	0	2	2	2	0	2	0	0	0	2	0	2	0	0	0	2	-1	2	2	2	0	0	0
2A_59938799	0	0	0	2	2	0	2	2	0	2	0	0	2	2	0	0	2	0	2	2	2	0	0	2	2	0	0	2	2	2	0	2	0	0	0	2	0	2	0	0	0	2	0	2	2	2	0	0	0
2A_61492819	0	0	0	2	2	0	2	2	0	2	0	0	2	2	0	0	2	0	2	2	2	0	0	2	2	2	0	2	2	2	0	2	0	0	0	2	0	2	0	0	0	2	0	2	2	2	0	0	0
2A_57973532	0	0	0	2	2	0	2	2	0	2	0	0	2	2	0	0	2	0	2	2	2	0	0	2	2	2	0	2	2	2	0	2	0	0	0	2	0	2	0	0	0	2	0	2	2	2	0	0	0
2A_48573530	0	0	0	-1	2	0	-1	2	0	2	0	0	2	2	0	0	2	0	2	2	2	0	0	2	2	2	0	2	0	2	0	2	0	0	0	2	0	2	0	0	0	2	0	0	2	2	0	0	0
2A_50916253	0	0	0	2	2	0	2	2	0	2	0	0	2	2	0	0	2	0	2	2	2	0	0	2	2	2	0	2	0	2	0	2	0	0	0	2	0	2	0	0	0	2	0	0	2	2	0	0	0
2A_47152293	0	0	0	2	2	0	2	2	0	2	0	0	2	2	0	0	2	0	2	2	2	0	0	2	2	2	0	2	0	2	0	2	0	-1	0	2	0	2	0	0	0	2	0	0	2	2	0	0	0
2A_40813530	2	0	0	2	2	0	-1	2	0	2	0	0	2	2	0	2	2	0	2	2	2	0	0	2	2	2	0	2	0	2	0	2	0	0	0	2	0	2	0	0	0	2	0	0	2	2	0	0	0
4A_733704262	2	2	2	0	0	2	0	0	2	0	2	0	0	0	0	0	2	0	2	0	2	2	0	0	0	2	0	2	2	0	0	0	0	2	0	0	0	2	2	2	0	2	0	2	0	0	0	2	0
4A_722047816	2	2	2	0	0	2	0	0	2	0	2	0	0	2	0	0	2	0	2	0	2	2	0	0	0	0	0	2	2	0	0	0	0	2	0	0	2	2	2	2	0	2	0	2	0	0	0	2	0
4A_723731289	2	2	2	0	0	2	0	0	2	0	2	0	0	2	0	0	2	0	2	0	2	2	0	0	0	0	0	2	2	0	0	0	0	2	0	0	2	2	2	2	0	2	-1	2	0	0	0	2	0
4A_723731307	2	2	2	0	0	2	0	0	2	0	2	0	0	2	0	0	2	0	2	0	2	2	0	0	0	0	0	2	2	0	0	0	0	2	0	0	2	2	2	2	0	2	-1	2	0	0	0	2	0
4A_720885422	2	2	2	0	0	2	0	0	2	0	2	0	0	2	0	0	2	0	2	0	2	2	0	0	0	0	0	2	2	0	0	0	0	2	0	0	2	2	2	2	0	2	0	2	0	0	0	2	0
4A_723935446	2	2	2	0	0	2	-1	0	2	-1	2	0	-1	2	0	0	2	0	2	0	2	2	0	-1	0	0	0	2	2	0	0	0	0	2	0	0	2	2	2	-1	0	2	-1	2	-1	0	0	2	-1
4A_713513570	2	2	2	0	0	2	0	0	2	2	2	0	0	2	0	0	2	0	2	0	0	2	0	0	0	2	0	2	2	0	0	0	0	2	0	0	0	2	2	2	0	2	0	2	0	0	0	2	0
4A_704324444	2	2	2	0	0	2	0	0	2	2	2	0	0	2	0	0	2	0	2	0	0	2	0	0	0	2	0	2	2	0	0	0	0	2	0	0	0	2	2	2	0	2	0	2	0	0	0	2	0
4A_707934625	2	2	2	0	0	2	-1	0	2	2	2	0	0	2	0	0	2	0	2	0	0	2	0	0	0	2	0	2	2	0	0	0	0	2	0	0	0	2	2	2	0	2	0	2	0	0	0	2	0
4A_704656497	2	2	2	0	0	2	0	0	2	2	2	0	0	2	0	0	2	0	2	0	0	2	0	0	0	2	0	2	2	0	0	0	0	2	0	0	0	2	2	2	0	2	0	2	0	0	0	2	0
4A_704648755	2	2	2	0	0	2	0	0	2	2	2	0	0	2	0	0	2	0	2	0	0	2	0	0	0	2	0	2	2	0	0	0	0	2	0	0	0	2	2	2	0	2	0	2	0	0	0	2	0
4A_700964251	2	2	2	0	0	0	0	0	2	2	0	0	2	2	0	0	2	0	2	0	0	2	0	0	0	2	0	2	2	0	0	0	0	0	0	0	2	2	0	2	0	2	0	2	0	0	0	2	0
4A_690657706	2	0	2	2	0	2	0	0	2	2	2	0	2	2	0	0	0	0	0	0	0	2	0	0	0	2	0	2	2	2	0	0	0	0	0	0	2	0	2	2	0	2	0	2	0	0	0	2	2
4A_644613024	2	0	2	2	2	0	0	0	2	2	0	0	2	2	0	0	0	0	0	0	0	2	0	0	0	2	0	2	2	2	0	0	0	0	0	0	2	0	0	2	0	2	0	2	0	0	0	2	2
4A_648910616	2	0	2	2	2	0	0	0	2	2	0	0	2	2	0	0	0	0	0	0	0	2	2	0	0	2	0	2	2	2	0	0	0	0	0	0	2	0	0	2	0	2	0	2	0	0	0	2	2
4A_666811268	2	0	2	2	2	0	0	0	2	2	0	0	2	2	0	0	0	0	0	0	0	2	2	2	0	2	0	2	2	2	0	0	0	0	0	0	2	0	0	2	0	0	0	2	0	0	0	2	2
4A_672508553	2	0	2	2	2	0	0	0	2	2	0	0	2	2	0	0	0	0	0	0	0	2	-1	-1	0	2	0	2	2	0	0	0	0	0	0	0	2	0	0	2	0	0	0	2	0	0	0	2	2
4A_672508567	2	0	2	2	2	0	0	0	2	2	0	0	2	2	0	0	0	0	0	0	0	2	2	-1	0	2	0	2	2	2	0	0	0	0	0	0	2	0	0	2	0	0	0	2	0	0	0	2	2
4A_672508702	2	0	2	2	2	0	0	0	2	-1	0	0	2	2	0	0	0	0	0	0	0	2	2	2	0	2	0	2	2	2	0	0	0	0	0	0	2	0	0	2	0	0	0	2	0	0	0	2	2
4A_676486292	2	0	2	2	2	2	0	0	2	2	2	0	2	2	0	0	0	0	0	0	2	2	2	2	0	2	0	2	2	2	2	0	0	0	0	0	2	0	2	2	0	0	0	2	0	0	2	0	2
4A_683950816	2	0	2	2	2	2	0	0	2	2	2	0	2	2	0	0	0	0	0	0	2	2	2	2	0	2	0	2	2	2	2	0	0	-1	0	0	2	0	2	2	0	0	0	2	0	0	2	0	2
4A_638262359	2	0	2	2	2	2	0	0	2	0	2	0	2	2	0	0	0	2	0	0	2	2	2	2	0	2	0	2	2	2	2	0	0	0	0	0	2	0	2	2	0	0	0	2	0	0	2	0	0
4A_639942192	2	0	2	2	2	2	0	0	2	0	2	0	2	2	0	0	0	2	0	0	2	2	2	-1	0	2	0	2	2	2	2	0	0	0	0	0	2	0	2	-1	0	0	0	2	0	0	2	0	0
4A_635663766	0	0	2	2	2	2	0	0	2	0	2	0	2	-1	0	0	0	2	0	0	2	2	2	-1	0	2	0	2	2	2	2	0	0	0	0	0	2	0	2	-1	0	0	0	2	0	0	2	0	0
4A_635663690	0	0	2	2	2	2	0	0	2	0	2	0	2	0	0	0	0	2	0	0	2	2	2	2	0	2	0	2	2	2	2	0	0	0	0	0	2	0	2	-1	0	0	0	2	0	0	2	0	0
4A_635943789	0	0	2	2	2	2	0	0	2	0	2	0	2	2	0	0	0	2	0	0	2	2	2	2	0	2	0	2	2	2	2	0	0	0	0	0	2	0	2	2	0	0	0	2	0	0	2	0	0
4A_628023767	0	0	2	2	2	2	-1	0	2	0	0	0	2	2	0	0	0	2	0	2	2	2	2	2	0	2	0	2	2	2	2	0	0	0	0	0	2	2	2	2	0	0	0	2	0	0	2	0	0
4A_628023813	0	0	2	2	2	2	-1	0	2	0	0	0	2	2	0	0	0	2	0	2	2	2	2	2	0	2	0	2	2	2	2	0	0	0	0	0	2	2	2	2	0	0	0	2	0	0	2	0	0
4A_620278986	0	0	2	2	2	2	2	0	2	0	0	0	2	2	0	0	0	2	0	2	0	2	2	2	0	2	0	2	2	0	2	0	0	0	0	0	2	2	2	2	0	0	0	2	0	0	2	0	0
4A_616600119	0	0	2	2	2	2	2	0	2	0	0	0	2	2	2	0	0	2	0	2	0	2	2	2	0	2	0	2	2	0	2	2	0	0	0	2	2	2	2	2	0	0	0	2	0	0	2	0	0
4A_613669588	0	0	2	2	2	2	2	0	2	0	0	0	2	2	2	0	0	2	0	2	0	2	2	2	0	2	0	2	2	0	2	2	0	0	0	2	2	0	2	2	2	0	0	2	0	0	2	0	0
4A_604840693	0	0	0	2	2	2	0	0	2	0	2	0	2	0	2	0	0	2	0	2	2	2	2	2	0	2	0	2	2	0	2	2	0	0	0	2	2	0	0	2	2	0	0	2	0	0	2	0	0
4A_604578311	0	0	0	2	2	2	0	0	2	0	2	0	2	0	2	0	0	2	0	2	2	2	2	2	0	2	0	2	2	0	2	2	0	0	0	2	2	0	0	2	2	0	0	2	0	0	2	0	0
4A_597902303	0	0	0	2	2	0	0	0	2	0	2	0	2	0	2	0	0	2	2	2	2	2	2	2	0	2	0	2	2	0	2	2	0	0	0	2	2	0	0	0	2	0	0	2	0	0	2	0	0
4A_593926870	0	0	0	2	2	0	0	0	2	0	2	0	2	0	2	0	0	0	2	2	2	2	2	2	0	0	0	2	2	0	2	2	0	0	0	2	2	0	0	0	2	0	0	2	0	0	2	0	0
4A_572876583	0	0	0	2	2	0	0	0	2	0	2	0	2	0	2	0	0	0	2	2	2	2	2	2	0	2	0	2	2	0	2	2	0	0	0	2	2	0	0	0	2	0	0	2	0	0	2	0	0
4A_297212589	0	0	0	2	2	0	0	0	2	0	2	0	2	0	2	0	0	0	2	2	2	2	2	2	0	2	0	2	2	0	2	2	0	-1	0	2	2	0	0	0	2	0	0	2	0	0	2	0	0
4A_525433605	0	0	0	2	2	0	0	0	2	0	2	0	2	0	2	0	0	0	2	2	2	2	2	2	0	2	0	2	2	0	2	2	0	0	0	2	2	0	0	0	2	0	0	2	0	0	2	0	0
4A_515273590	0	0	0	2	2	0	0	0	2	0	2	0	2	0	2	0	0	0	2	2	2	2	2	2	0	2	0	2	2	0	2	2	0	0	0	2	2	0	0	0	2	0	0	2	0	0	2	0	0
4A_538075357	0	0	0	2	2	0	0	0	2	0	2	0	2	0	2	0	0	0	2	2	2	2	2	2	0	2	0	2	2	0	2	2	0	0	0	2	2	0	0	0	2	0	0	2	0	0	2	0	0
4A_113318756	0	0	0	2	2	0	0	0	2	0	2	0	2	0	2	0	0	0	2	2	2	2	2	2	0	2	0	2	2	0	2	2	0	0	0	0	2	0	0	0	2	0	0	2	0	0	2	0	0
4A_45115537	0	0	0	2	2	0	0	0	2	0	2	0	2	0	2	0	0	0	2	2	2	2	0	2	0	2	0	2	2	0	2	2	0	0	0	0	2	0	0	0	2	0	0	2	2	0	2	0	0
4A_60741788	0	0	0	2	2	0	0	0	2	0	2	0	2	0	2	0	0	0	2	2	2	2	2	2	0	2	0	2	2	0	2	2	0	0	0	0	2	0	0	0	2	0	0	2	2	0	2	0	0
4A_60882932	0	0	0	2	2	0	0	0	2	0	2	0	2	0	2	0	0	0	2	2	2	2	2	-1	0	2	0	2	2	0	2	2	0	0	0	0	2	0	0	0	2	0	0	2	2	0	2	0	0
4A_40010851	0	0	0	2	2	0	0	0	2	0	2	0	2	0	2	0	0	0	2	2	2	2	0	2	0	2	0	2	2	0	2	2	0	0	0	0	2	0	0	0	2	0	0	2	2	0	2	0	0
4A_38335666	0	0	0	2	2	0	0	0	2	0	2	0	2	0	2	0	0	0	2	2	2	2	0	2	0	2	0	2	2	0	2	2	0	0	0	0	2	0	0	0	2	0	0	2	2	0	2	0	0
4A_26066264	0	0	0	2	2	0	0	0	2	0	2	0	2	0	2	0	0	0	2	2	2	2	0	2	0	0	0	2	2	0	2	2	0	0	0	0	2	0	0	2	2	0	0	2	2	0	2	2	0
4A_17717097	0	0	0	2	2	2	0	0	2	2	2	0	2	0	2	0	0	0	2	2	2	2	0	2	0	2	0	2	2	0	2	2	0	0	0	0	2	0	0	2	2	0	0	2	2	0	2	2	0
4A_17717049	0	0	0	2	2	2	0	0	2	2	2	0	2	0	2	0	0	0	2	2	2	2	0	2	0	2	0	2	2	0	2	2	0	0	0	0	2	0	0	2	2	0	0	2	2	0	2	2	-1
4A_13287568	0	0	0	2	2	2	0	0	2	2	2	0	2	0	2	0	0	0	2	2	2	2	0	2	0	2	0	2	2	0	2	2	0	0	0	0	2	0	0	-1	2	0	0	2	2	0	2	2	0
4A_15121018	0	0	0	2	2	2	0	0	2	2	2	0	2	0	2	0	0	0	2	2	2	2	0	2	0	2	0	2	2	0	2	2	0	0	0	0	2	0	0	2	2	0	0	2	2	0	2	2	0
4A_12158478	0	0	0	2	2	2	0	0	2	2	2	0	2	0	2	0	2	0	2	2	2	2	0	2	0	2	0	2	2	0	2	2	0	0	2	0	2	0	0	2	2	0	0	2	2	0	2	2	0
2D_552964256	0	0	0	2	2	2	2	0	2	0	0	2	2	0	0	2	2	0	2	0	0	0	0	2	2	0	0	2	0	0	2	0	2	0	2	0	2	0	0	2	0	0	0	0	2	0	2	2	0
2D_540218193	0	0	0	2	2	2	2	0	2	0	0	2	0	0	0	2	2	2	2	0	0	0	0	2	2	0	0	2	0	0	2	0	2	0	2	0	2	0	0	2	0	0	0	0	2	0	2	2	0
2D_527923767	0	0	0	2	2	2	2	0	0	2	0	2	0	0	0	2	2	2	2	0	0	0	0	2	2	2	0	2	0	0	2	0	2	0	2	2	0	0	0	2	0	0	0	0	2	0	2	2	0
2D_524110208	0	0	0	2	2	2	2	0	0	2	0	2	0	0	0	2	2	2	2	0	0	0	0	2	2	2	0	2	0	0	2	0	2	0	2	2	0	0	0	2	0	0	0	0	2	0	2	2	0
2D_517777466	0	0	0	2	2	2	2	0	0	2	0	2	0	0	0	2	2	2	2	0	0	0	0	2	2	2	0	2	0	0	2	0	2	0	2	2	0	0	0	2	0	0	0	0	2	0	2	2	0
2D_471836283	0	0	0	2	2	2	2	0	0	2	0	2	0	0	0	2	2	2	2	0	0	0	0	2	2	0	0	2	0	0	2	0	2	0	2	2	0	0	0	2	0	0	0	0	2	0	2	2	0
2D_462507648	0	0	0	2	2	2	2	0	0	2	0	2	0	0	0	2	2	2	2	0	0	0	2	2	2	0	0	2	0	0	2	0	2	0	2	2	0	0	0	2	0	0	0	0	2	0	2	2	0
2D_428576623	0	0	0	2	2	2	2	0	0	2	0	2	0	0	0	2	2	2	2	0	0	0	2	2	2	2	0	2	0	0	2	0	2	-1	2	2	0	0	0	0	0	0	0	0	2	0	2	2	0
2D_418766391	0	0	0	2	2	2	2	0	0	2	0	2	0	0	0	2	2	2	2	0	0	0	2	2	2	2	0	2	2	0	2	0	2	0	2	2	0	0	0	0	0	0	0	0	2	0	2	2	0
2D_398452942	0	2	0	2	2	2	2	0	0	2	0	2	0	0	0	2	2	2	2	0	0	0	2	2	2	2	0	2	2	0	2	0	2	0	2	2	0	0	0	0	0	0	0	0	2	0	2	2	0
2D_391463774	0	2	0	2	2	2	2	0	0	2	0	2	0	0	0	2	2	2	2	0	0	0	2	2	2	2	0	2	2	0	2	0	2	0	2	2	0	0	0	0	0	0	0	0	2	0	2	2	0
2D_377507646	0	2	0	2	2	2	2	0	0	2	0	2	0	0	0	2	2	2	2	0	0	0	2	2	2	2	0	2	2	0	2	0	2	2	2	2	0	0	0	0	0	0	0	0	2	0	2	2	0
2D_361421932	0	2	0	2	2	2	-1	0	0	2	0	2	0	0	0	2	2	2	2	0	0	0	2	2	2	2	0	2	2	0	2	0	2	-1	2	2	0	0	0	0	0	0	0	0	2	0	2	2	0
2D_277678464	0	2	2	2	2	2	2	0	0	2	0	2	0	0	0	2	2	2	2	0	0	0	2	2	2	2	0	2	2	0	2	0	2	2	2	2	0	0	0	0	0	0	0	0	2	0	2	2	0
2D_366960397	0	2	0	2	2	2	2	0	0	2	0	2	0	0	0	2	2	2	2	0	0	0	2	2	2	2	0	2	2	0	2	0	2	2	2	2	0	0	0	0	0	0	0	0	2	0	2	2	0
2D_160828087	0	2	2	2	2	2	2	0	0	2	0	2	0	0	0	2	2	2	2	0	0	0	2	2	2	2	0	2	2	0	2	0	2	2	2	2	0	0	0	0	0	0	0	0	2	0	2	2	0
2D_140096768	0	2	2	2	2	2	2	0	0	2	0	2	0	0	0	2	2	2	2	0	0	0	2	2	2	2	0	2	2	0	2	0	2	2	2	2	0	0	0	0	0	0	0	0	2	0	2	2	0
2D_127224123	0	2	2	2	2	2	2	0	0	2	0	2	0	0	0	2	2	2	2	0	0	0	2	2	2	2	0	2	2	0	2	0	2	2	2	2	0	0	0	0	0	0	0	0	2	0	2	2	2
2D_110061213	0	2	2	2	2	2	2	0	0	2	0	2	0	0	0	2	2	2	2	0	0	0	2	2	2	2	0	2	2	0	2	0	2	2	2	2	0	0	0	0	0	0	0	0	2	0	2	2	2
2D_102914609	0	2	2	2	2	2	2	0	0	2	0	2	0	0	0	2	2	2	2	0	0	0	2	2	2	2	0	2	0	0	2	0	2	2	2	2	0	0	0	0	2	0	0	0	2	0	2	2	2
2D_81393916	0	2	2	2	2	2	2	0	0	2	0	2	0	0	0	2	2	2	2	0	0	0	2	2	2	2	0	2	0	0	2	0	2	2	2	2	0	0	0	0	0	0	0	0	2	0	2	2	2
2D_76616365	0	2	2	2	2	2	2	0	2	2	0	2	0	0	0	2	2	2	2	0	0	0	2	2	2	2	0	2	0	0	2	0	2	2	2	2	0	0	0	0	0	0	0	0	2	0	2	2	2
2D_73554547	0	2	2	2	2	2	2	0	2	2	0	2	0	0	0	2	2	2	2	0	2	0	2	2	2	2	0	2	0	0	2	0	2	2	2	2	0	0	0	0	0	0	0	0	2	0	2	2	2
2D_72620946	0	2	2	2	2	2	2	0	2	2	0	2	0	0	0	2	2	2	2	0	2	0	2	2	2	2	0	2	0	0	2	0	2	2	2	2	0	0	0	0	0	0	0	0	2	0	2	2	2
2D_62297218	0	2	2	2	2	2	2	0	2	2	0	2	0	0	0	2	2	2	2	0	2	0	0	2	2	2	0	2	0	0	2	0	2	2	2	2	0	0	0	0	0	0	0	0	2	0	2	2	2
2D_56795375	0	2	2	2	2	2	2	0	2	2	0	2	0	0	0	2	2	2	2	0	2	0	0	2	2	2	2	2	0	0	2	0	2	2	2	2	0	0	0	0	0	0	0	0	2	0	2	2	2
2D_49079010	0	2	2	2	2	0	2	0	2	2	0	2	0	0	0	2	2	2	2	0	2	0	0	2	2	2	2	2	0	0	0	0	2	0	2	2	0	0	0	0	0	0	0	0	2	0	0	2	2
5D_390409478	2	2	0	0	0	2	-1	2	0	0	2	2	2	0	2	2	2	0	2	2	2	2	2	2	0	0	2	0	0	0	2	0	0	0	0	2	2	0	0	0	0	0	0	2	2	0	2	2	0
5D_375729034	2	2	0	0	0	2	2	2	0	0	2	2	2	0	2	2	2	0	2	2	2	2	2	2	0	0	2	0	0	0	2	0	0	0	0	2	2	0	0	0	0	0	0	2	2	2	2	2	0
5D_370312603	2	2	0	0	0	2	2	2	0	0	2	2	2	0	2	2	2	0	2	2	2	2	2	2	0	2	2	0	0	0	2	0	0	0	0	2	2	0	0	0	0	0	0	2	2	2	2	2	0
5D_345648257	2	2	0	2	0	2	2	2	0	0	2	2	2	0	2	2	2	0	2	0	2	2	2	-1	0	2	2	0	0	0	2	0	0	0	0	2	2	2	0	-1	0	0	0	2	2	2	2	2	0
5D_340068440	2	2	0	2	0	2	2	2	0	0	2	2	2	0	2	2	2	0	2	0	2	2	2	2	0	0	2	0	0	0	2	0	0	0	0	2	2	2	0	0	0	0	0	2	2	2	2	2	0
5D_314429199	2	2	0	2	0	2	2	2	0	0	2	2	2	0	2	2	2	0	2	0	2	2	2	2	0	0	2	2	0	0	2	0	0	0	0	2	2	2	0	0	0	0	0	2	2	2	2	2	0
5D_308355138	2	2	0	2	0	2	2	2	0	0	2	2	2	0	2	2	2	0	2	0	2	2	2	2	0	2	2	2	0	0	2	0	0	0	0	2	2	2	0	0	0	0	0	2	2	2	2	2	0
5D_284018236	2	2	0	2	0	2	2	2	0	0	2	2	2	0	2	2	2	0	2	0	2	2	2	-1	0	2	2	2	0	0	2	0	0	0	0	2	2	2	0	0	0	0	0	2	2	2	2	2	0
5D_259452342	2	2	0	2	0	2	2	2	0	0	2	2	2	0	2	2	2	0	2	0	2	2	2	2	0	2	2	2	0	0	2	0	0	0	0	2	2	2	0	0	0	0	0	2	2	2	2	2	0
5D_116251164	2	2	0	2	0	0	2	2	0	0	2	2	2	0	2	2	2	0	2	0	2	2	2	2	0	2	2	2	0	0	2	0	0	0	0	2	2	2	0	0	0	0	0	2	2	2	2	2	0
5D_97581236	2	2	0	2	0	0	2	2	0	0	2	2	2	0	2	2	2	0	2	0	2	2	2	2	0	2	2	2	0	0	2	0	0	0	0	2	2	2	0	0	0	0	0	2	2	2	2	2	0
5D_275905698	2	2	0	2	0	2	2	2	0	0	2	2	2	0	2	2	2	0	2	0	2	2	2	-1	0	0	2	2	0	0	2	0	0	0	0	2	2	2	0	0	0	0	0	2	2	2	2	2	0
5D_232458832	2	2	0	2	0	2	2	2	0	0	2	2	2	0	2	2	2	0	2	0	2	2	2	2	0	2	2	2	0	0	2	0	0	0	0	2	2	2	0	0	0	0	0	2	2	2	2	2	0
5D_138877074	2	2	0	2	0	0	2	2	0	0	2	2	2	0	2	2	2	0	2	0	2	2	2	2	0	2	2	2	0	0	2	0	0	0	0	2	2	2	0	0	0	0	0	2	2	2	2	2	0
5D_67024784	2	2	0	2	0	0	2	2	0	0	2	2	2	0	2	2	2	0	2	0	2	2	2	2	0	2	2	2	0	0	2	0	0	0	0	2	2	2	0	0	0	0	0	2	2	2	2	2	0
5D_53374410	2	2	0	2	0	0	2	2	0	0	2	2	2	0	2	2	2	0	2	0	2	2	2	2	0	2	2	2	0	0	2	0	0	0	0	2	2	2	0	0	0	0	0	2	2	2	2	2	0
5D_47009022	2	2	0	2	0	0	2	2	0	0	2	2	2	0	2	2	2	0	2	0	2	2	2	-1	2	2	2	2	0	0	2	0	0	0	0	2	2	2	0	0	0	0	0	2	2	2	2	2	0
5D_34236785	2	2	0	2	0	0	2	2	0	0	2	2	2	0	2	2	2	0	2	0	2	2	2	2	2	2	2	2	0	0	2	0	0	0	0	2	0	2	0	0	0	0	0	0	2	2	2	2	0
5D_35329920	2	2	0	2	0	0	2	2	0	0	2	2	2	0	2	2	2	0	2	0	2	2	2	2	2	2	2	2	0	0	2	0	0	0	0	2	0	2	0	0	0	0	0	0	2	2	2	2	0
5D_21550073	2	2	0	2	0	0	2	2	0	0	2	2	2	0	2	2	2	0	2	0	2	2	2	2	2	2	2	2	0	0	2	0	0	-1	0	2	0	2	0	0	0	0	0	0	2	2	2	2	0
3D_556125772	0	0	2	0	2	0	2	2	0	0	0	0	2	2	2	0	0	0	0	2	2	0	0	2	2	2	2	2	2	2	2	0	2	2	2	0	0	0	2	0	2	0	2	0	2	0	2	0	0
3D_538481562	0	0	2	0	2	0	2	2	0	0	2	0	2	2	2	0	0	0	0	2	2	0	0	2	2	2	0	2	2	2	2	0	2	2	0	0	0	2	2	-1	2	0	2	0	2	0	2	0	0
3D_533887239	0	0	2	0	2	0	2	2	0	0	2	0	2	2	2	0	0	0	0	2	2	0	0	2	2	2	0	2	2	2	2	0	0	2	0	0	0	2	2	2	2	0	-1	0	2	0	2	0	0
3D_519336115	0	0	2	0	2	0	2	2	0	0	2	0	2	2	2	0	0	0	0	2	2	0	0	2	2	2	0	2	2	2	2	0	0	2	0	0	0	2	2	2	2	0	-1	0	2	0	2	0	0
3D_517155423	0	0	2	0	2	0	2	2	0	0	2	0	2	2	2	0	0	0	0	2	2	0	0	2	2	2	0	2	2	2	2	0	0	0	0	0	0	2	2	2	2	0	-1	0	2	0	2	0	0
3D_494560750	0	0	2	0	2	2	2	2	0	0	2	0	2	2	2	0	0	0	0	2	2	0	0	2	2	2	0	2	2	2	2	0	0	0	0	0	0	0	2	2	2	2	-1	0	2	0	2	0	0
3D_463246798	0	2	2	2	2	2	2	2	0	0	2	0	2	2	2	0	0	0	0	2	2	0	0	2	2	2	0	2	2	2	2	0	0	0	0	0	0	0	2	2	2	2	-1	0	2	0	2	0	0
3D_458916437	0	2	2	2	2	2	2	2	0	0	2	0	2	2	2	0	0	0	0	2	2	0	0	2	2	2	0	2	2	2	2	0	0	0	0	0	0	0	0	2	2	2	-1	0	2	0	2	0	0
3D_455076497	0	2	2	2	2	0	2	2	0	0	0	0	2	2	2	0	0	2	0	0	2	0	0	2	2	2	0	2	2	2	0	0	0	0	0	0	0	0	0	2	2	2	-1	0	2	0	0	0	0
3D_397539392	0	2	2	2	0	2	2	2	0	0	2	2	2	2	2	0	0	2	0	2	2	0	0	2	2	2	0	2	2	2	2	0	0	0	0	2	0	0	0	2	2	2	0	0	2	0	2	0	0
3D_395732257	0	2	2	2	0	2	2	2	0	0	2	2	2	2	2	0	0	2	0	2	2	0	0	2	2	2	0	2	2	2	2	0	0	0	0	2	0	0	0	2	2	2	0	0	2	0	2	0	0
3D_371340548	0	2	2	2	0	2	2	2	0	0	2	2	2	2	2	0	0	2	0	2	2	0	0	2	2	2	0	2	2	2	2	0	0	-1	0	2	0	0	0	2	2	2	0	0	2	0	2	0	-1
3D_339067297	-1	2	2	2	-1	2	2	2	0	0	2	2	2	2	2	0	0	2	0	2	2	0	0	2	2	2	0	2	2	2	2	0	0	-1	0	2	0	0	0	2	2	2	0	0	2	0	2	0	0
3D_337177225	0	2	2	2	0	2	2	2	0	0	2	2	2	2	2	0	0	2	0	2	2	0	0	2	2	2	0	2	2	2	2	0	0	0	0	2	0	0	0	2	2	2	0	0	0	0	2	0	0
3D_300178714	0	2	2	2	0	2	2	2	0	0	2	2	2	2	2	0	0	2	0	2	2	0	0	2	2	2	0	2	2	2	2	0	0	0	0	2	0	0	0	2	2	2	0	0	0	0	2	0	0
3D_269719351	0	2	2	2	0	2	0	2	0	0	2	2	2	2	2	0	0	2	0	2	2	0	0	2	2	2	0	2	2	2	2	0	0	0	0	2	0	0	0	2	2	2	0	0	0	0	2	0	0
3D_167384458	0	2	2	2	0	2	0	2	0	0	2	2	2	2	2	0	0	2	0	2	2	0	0	2	2	2	0	2	2	2	2	0	0	0	0	2	0	0	0	2	2	2	0	0	0	0	2	0	0
3D_136295904	0	2	2	2	0	2	0	2	0	0	2	2	2	2	2	0	0	2	0	2	2	0	0	2	2	-1	0	2	2	2	2	0	0	0	0	2	0	0	0	2	2	2	0	0	0	0	2	0	0
3D_102844767	0	2	2	2	0	0	0	2	0	0	0	2	2	2	2	0	0	2	0	0	2	0	0	2	2	2	0	2	2	2	0	0	0	0	0	2	0	0	0	2	2	2	0	0	0	0	0	0	0
3D_117448620	0	2	2	2	0	0	0	2	0	0	0	2	2	2	2	0	0	2	0	0	2	0	0	2	2	2	0	2	2	2	0	0	0	0	0	2	0	0	0	2	2	2	0	0	0	0	0	0	0
3D_103823580	0	2	2	2	0	0	0	2	0	0	0	2	2	2	2	0	0	2	0	0	2	0	0	2	2	2	0	2	2	2	0	0	0	0	0	2	0	0	0	2	2	2	0	0	0	0	0	0	0
3D_39118733	-1	-1	2	2	0	0	0	2	0	0	0	2	-1	2	-1	0	0	2	0	0	2	0	0	-1	2	2	0	2	2	0	0	0	0	0	0	2	0	2	0	2	2	2	0	0	2	0	0	0	0
3D_5394432	0	2	2	0	0	2	2	2	2	0	0	2	2	2	2	2	0	2	0	2	2	0	0	2	2	2	0	2	2	0	2	0	0	2	0	2	2	0	0	2	2	2	0	0	2	0	2	0	0
6D_467043243	2	0	0	0	0	0	2	0	2	0	2	0	0	2	2	2	2	2	0	2	0	0	2	2	2	0	2	0	2	0	2	0	0	2	0	0	2	2	2	0	0	0	2	2	2	0	2	0	2
6D_465334824	2	0	0	0	0	0	2	0	2	0	2	0	0	2	2	2	2	2	0	2	0	0	2	2	2	2	2	0	2	0	2	0	0	2	0	0	2	2	2	0	0	0	2	2	2	0	2	0	2
6D_464677943	2	-1	0	0	0	0	2	0	2	0	2	0	0	2	2	2	2	2	0	2	0	0	2	2	2	2	2	2	2	0	2	0	0	-1	0	0	2	2	2	0	0	0	2	2	2	0	2	0	2
6D_464678128	2	0	0	0	0	0	2	0	2	0	2	0	0	2	2	2	2	2	0	2	0	0	2	2	2	0	2	2	2	0	2	0	0	2	0	0	2	2	2	0	0	0	2	2	2	0	2	0	2
6D_464020946	2	0	0	0	0	0	2	0	2	0	2	0	0	2	2	2	2	2	0	2	0	0	2	2	2	2	2	2	2	0	2	0	0	2	0	0	2	2	2	0	0	0	2	2	2	0	2	0	2
6D_464185695	2	0	0	0	0	0	2	0	2	0	2	0	0	2	2	2	2	2	0	2	0	0	2	2	2	2	2	2	2	0	2	0	0	2	0	0	2	2	2	0	0	0	2	2	2	0	2	0	2
6D_462425676	2	0	0	0	0	0	2	0	2	0	2	0	0	2	0	2	2	2	0	2	0	0	2	2	2	2	2	2	2	0	2	0	0	0	0	0	2	2	2	0	0	0	2	2	2	0	2	0	2
6D_461452001	2	-1	0	0	0	0	2	0	2	0	2	0	0	2	0	2	2	2	0	2	0	0	2	2	2	2	2	2	2	0	2	0	0	-1	0	0	2	2	2	0	0	0	2	2	2	0	2	0	2
6D_461360687	2	0	0	0	0	0	2	0	2	0	2	0	0	2	0	2	2	2	0	2	0	0	2	2	2	2	2	2	2	0	2	0	0	0	0	0	2	2	2	0	0	0	2	2	2	0	2	0	2
6D_460854207	2	0	0	0	0	0	2	0	2	0	2	0	0	2	0	2	2	2	0	2	0	0	2	-1	2	2	2	2	2	0	2	0	0	0	0	0	2	2	2	0	0	0	2	2	2	0	2	0	2
6D_458492365	2	0	0	0	0	0	2	0	2	0	2	0	0	2	0	2	2	2	0	2	0	0	2	0	2	2	2	2	2	0	2	0	0	0	0	0	2	2	2	0	0	0	2	2	2	0	2	0	2
6D_458987916	2	0	0	0	0	0	2	0	2	0	-1	0	0	2	0	2	2	2	0	-1	0	0	2	0	2	2	-1	2	2	0	-1	0	0	-1	0	0	2	2	2	0	0	0	2	-1	2	0	-1	0	2
7D_272526435	0	0	0	2	0	0	0	0	2	0	0	0	0	0	0	2	0	2	0	0	0	0	2	2	2	2	2	0	0	0	0	0	2	0	2	0	0	2	0	2	2	0	0	2	0	2	0	0	0
7D_280015884	0	0	0	2	0	0	0	0	2	0	0	0	0	0	0	2	0	2	0	0	0	0	2	2	2	2	2	0	0	0	0	0	2	0	2	0	0	2	0	2	2	0	0	2	0	2	0	0	0
7D_549772263	0	0	0	2	2	0	0	0	0	0	0	0	2	0	2	2	0	2	0	2	0	0	2	2	2	2	2	0	2	0	0	0	2	2	2	0	0	2	0	2	2	0	0	2	0	2	0	0	0
7D_553355887	0	-1	0	2	2	0	0	0	0	0	0	0	2	0	2	2	0	2	0	2	0	0	2	2	2	2	2	0	2	0	0	0	2	2	2	0	0	2	0	2	2	0	0	2	0	2	0	0	0
7D_508737766	0	0	0	2	2	2	0	0	2	0	0	0	2	0	0	2	0	2	0	2	0	0	2	2	2	2	2	0	2	0	0	0	2	2	2	0	0	2	0	2	2	0	0	2	0	2	0	0	0
7D_497210392	0	0	0	2	2	2	0	0	2	0	0	0	2	0	0	2	0	2	0	2	0	0	2	2	2	2	2	0	2	0	0	0	2	2	2	0	0	2	0	2	2	0	0	2	0	2	0	0	0
7D_489015092	0	0	0	2	2	2	0	0	2	0	0	0	2	0	0	2	0	2	0	2	0	0	2	2	2	2	2	0	2	0	0	0	2	2	2	0	0	2	0	2	2	0	0	2	0	2	0	0	0
7D_445730650	0	-1	0	2	2	2	0	0	2	0	0	0	2	0	0	2	0	2	0	2	0	0	2	2	2	2	2	0	0	0	0	0	2	2	2	0	0	2	0	2	2	0	0	2	0	2	0	0	-1
7D_298100250	0	0	0	2	2	2	0	0	2	0	0	0	2	0	0	2	0	2	0	2	0	0	2	2	2	2	2	0	0	0	0	0	2	2	2	0	0	2	0	-1	2	0	0	2	0	2	0	0	0
7D_234175354	0	0	0	2	2	2	0	0	2	0	0	0	2	0	0	2	0	2	0	2	0	0	2	2	2	2	2	0	0	0	0	0	2	2	2	0	0	2	0	2	2	0	0	2	0	2	0	0	0
7D_211889484	0	-1	0	2	2	2	0	0	2	-1	0	0	2	0	0	2	0	2	0	2	0	0	2	-1	2	2	2	0	0	0	0	0	2	2	2	0	0	2	0	2	2	0	0	2	0	2	0	0	-1
7D_143146331	0	0	0	2	2	2	0	0	2	0	0	0	2	0	2	2	0	2	0	2	0	0	2	2	2	2	2	0	0	0	0	0	2	-1	2	0	2	2	0	2	2	0	0	2	0	2	0	0	0
7D_113753770	0	0	0	2	2	2	0	0	2	0	0	0	2	0	2	2	0	2	0	2	0	0	2	2	2	2	2	0	0	0	0	0	2	2	2	0	2	2	0	2	2	0	0	2	0	2	0	0	0
7D_112054562	-1	0	0	2	2	2	0	0	2	0	0	0	2	0	2	2	0	2	0	2	0	0	2	2	2	2	2	0	0	0	0	0	2	2	2	0	-1	2	0	-1	2	0	0	2	0	2	0	0	-1
7D_161971652	0	0	0	2	2	2	0	0	2	0	0	0	2	0	2	2	0	2	0	2	0	0	2	2	2	2	2	0	0	0	0	0	2	2	2	0	0	2	0	2	2	0	0	2	0	2	0	0	0
2B_789604077	2	2	2	0	2	2	0	2	0	0	2	2	2	0	2	0	2	0	2	0	0	0	2	0	2	0	2	2	2	0	2	2	0	2	2	2	2	0	0	0	0	0	2	0	2	2	2	2	0
2B_793323889	2	2	2	0	2	2	-1	2	0	-1	2	2	2	0	2	0	2	0	2	0	0	0	2	0	2	0	2	2	2	0	2	2	0	2	2	2	2	2	0	0	0	0	2	0	2	2	2	2	2
2B_793323945	2	2	2	0	2	2	-1	2	0	-1	2	2	2	0	2	0	2	0	2	0	0	0	2	0	2	0	2	2	2	0	2	2	0	2	2	2	2	2	0	0	0	0	2	0	2	2	2	2	2
2B_789604080	2	2	2	0	2	2	0	2	0	0	2	2	2	0	2	0	2	0	2	0	0	0	2	0	2	0	2	2	2	0	2	2	0	2	2	2	2	2	0	0	0	0	2	0	2	2	2	2	2
2B_788590835	2	2	2	0	2	2	0	2	0	0	2	2	2	0	2	0	2	0	2	0	0	0	2	0	2	0	2	2	2	0	2	2	0	2	2	2	2	2	0	0	0	0	2	0	2	2	2	2	2
2B_785746476	2	2	2	0	2	2	0	2	0	0	2	2	2	0	2	0	2	0	2	0	0	0	2	0	2	0	2	2	2	2	2	2	0	2	2	2	2	2	0	0	0	0	2	0	2	2	2	2	2
2B_785746422	2	2	2	0	2	2	0	2	0	0	2	2	2	0	2	0	2	0	2	0	0	0	2	0	2	0	2	2	2	2	2	2	0	2	2	2	2	2	0	0	0	0	2	0	2	2	2	2	2
2B_788590711	2	2	2	0	2	2	0	2	0	0	2	2	2	0	2	0	2	0	2	0	0	0	2	0	2	2	2	2	2	0	2	2	0	2	2	2	2	2	0	0	0	0	2	0	2	2	2	2	2
2B_789603932	2	2	2	0	2	2	-1	2	0	0	2	2	2	0	2	0	2	0	2	0	0	0	2	0	2	2	2	2	2	0	2	2	0	2	2	2	2	2	0	0	0	0	2	0	2	2	2	2	2
2B_793323874	2	2	2	0	2	2	-1	2	0	-1	2	2	2	0	2	0	2	0	2	0	0	0	2	0	2	2	2	2	2	0	2	2	0	2	2	2	2	2	0	0	0	0	2	0	2	2	2	2	2
2B_788590800	2	2	2	0	2	2	-1	2	0	0	2	2	2	0	2	0	2	0	2	0	0	0	2	0	2	2	2	2	2	0	2	2	0	2	2	2	2	2	0	0	0	0	2	0	2	2	2	2	2
2B_784714022	2	2	2	0	0	2	0	2	0	0	2	2	2	0	2	0	2	0	2	0	0	0	2	0	2	2	2	2	2	2	2	2	0	2	2	2	2	2	0	0	0	0	2	0	2	2	2	2	2
2B_781527257	-1	-1	2	0	0	2	0	-1	0	-1	2	2	-1	2	2	0	2	-1	2	0	0	0	2	-1	2	-1	2	2	2	0	2	2	0	2	2	-1	2	2	0	-1	0	0	-1	-1	2	2	2	2	2
2B_781527204	2	2	2	0	0	2	0	-1	0	0	2	2	2	2	2	0	2	0	2	0	0	0	2	-1	2	2	2	2	2	2	2	2	0	2	2	-1	2	2	0	0	0	0	-1	0	2	2	2	2	2
2B_781811746	2	2	2	0	0	2	0	2	0	0	2	2	2	2	2	0	2	0	2	0	0	0	2	0	2	2	2	2	2	2	2	2	0	2	2	2	2	2	0	0	0	0	2	0	2	2	2	2	2
2B_777925017	2	2	2	0	0	2	0	2	0	0	2	2	2	2	2	0	2	0	2	0	0	0	2	0	2	2	2	2	2	2	2	2	0	2	2	2	2	2	2	0	0	0	2	0	2	2	2	2	2
2B_777384605	2	2	2	0	0	2	0	2	0	0	2	2	2	2	2	0	2	0	2	0	0	0	2	0	2	2	2	2	2	2	2	2	0	2	2	2	2	2	2	0	0	0	2	0	2	2	2	2	2
7B_725766535	2	2	2	0	-1	0	-1	2	0	0	2	0	2	2	0	2	2	0	0	2	2	2	0	2	0	2	2	0	2	0	2	0	2	2	0	0	2	2	2	2	0	0	-1	0	0	0	2	2	0
7B_725766513	2	2	2	0	-1	0	-1	2	0	0	2	0	2	2	0	2	2	0	0	2	2	2	0	2	0	2	2	0	2	0	2	0	2	2	0	0	2	2	2	2	0	0	-1	0	0	0	2	2	0
7B_725723913	2	2	2	0	2	0	2	2	0	0	2	0	2	2	0	2	2	0	0	2	2	2	0	2	0	2	2	0	2	0	2	0	2	2	0	0	2	2	2	2	0	0	2	0	0	0	2	2	0
7B_718449045	2	0	2	0	2	0	2	2	0	0	2	0	2	2	0	2	2	0	0	2	2	2	0	2	0	2	2	0	2	0	2	0	2	2	0	0	0	2	2	2	0	0	2	0	0	0	2	2	0
7B_712710871	2	0	2	0	2	0	2	2	0	0	0	0	2	2	0	2	2	0	0	0	2	2	0	2	2	2	2	0	2	0	0	2	2	0	0	0	0	2	0	2	0	0	2	0	-1	2	0	2	0
7B_711483862	2	0	2	0	2	0	2	2	0	0	0	0	2	2	0	2	2	0	0	0	2	2	0	2	2	2	2	0	2	0	0	2	2	0	0	0	0	2	0	2	0	0	2	0	0	2	0	2	0
7B_711444726	2	0	2	0	2	0	2	2	0	0	0	0	2	2	0	2	2	0	0	0	2	2	0	2	2	2	2	0	2	0	0	2	2	0	0	0	0	2	0	2	0	0	2	0	0	2	0	2	0
7B_711444763	2	0	2	0	2	0	2	2	0	0	0	0	2	2	0	2	2	0	0	0	2	2	0	2	2	2	2	0	2	0	0	2	2	0	0	0	0	2	0	2	0	0	2	0	0	2	0	2	0
7B_709107276	2	0	2	0	2	0	-1	2	0	0	0	0	2	2	0	2	2	0	0	0	2	2	0	2	2	2	2	0	2	0	0	2	2	-1	0	0	0	2	0	2	0	0	2	0	-1	2	0	2	0
7B_709107241	2	0	2	0	2	0	2	2	0	0	0	0	2	2	0	2	2	0	0	0	2	2	0	2	2	2	2	0	2	0	0	2	2	-1	0	0	0	2	0	2	0	0	2	0	-1	2	0	2	0
7B_708532363	2	0	2	0	2	0	2	2	0	0	0	0	-1	2	0	2	2	0	0	0	-1	0	0	-1	2	2	2	0	2	0	0	2	2	-1	0	0	0	2	0	2	0	0	2	0	-1	2	0	2	0
7B_708532468	2	0	2	0	2	0	2	2	0	0	0	0	2	2	0	2	2	0	0	0	2	0	0	-1	2	2	2	0	2	0	0	2	2	0	0	0	0	2	0	2	0	0	2	0	0	2	0	2	0
7B_704666643	2	0	2	0	2	0	-1	2	0	0	0	0	2	2	0	2	2	0	0	0	2	0	0	0	2	2	2	0	2	0	0	2	2	-1	0	0	0	2	0	-1	0	0	2	0	0	2	0	2	0
7B_702321632	2	0	2	0	2	0	2	2	0	0	0	0	2	2	0	2	2	0	0	0	2	0	0	0	2	2	2	0	2	0	0	2	2	0	0	0	0	2	0	2	0	0	-1	0	0	2	0	2	0
7B_703502760	2	0	2	0	2	0	2	2	0	0	0	0	2	2	0	2	2	0	0	0	2	0	0	0	2	2	2	0	2	0	0	2	2	0	0	0	0	2	0	2	0	0	-1	0	0	2	0	2	0
7B_704166697	2	0	2	0	2	0	2	2	0	0	0	0	2	2	0	2	2	0	0	0	2	0	0	0	2	2	2	0	2	0	0	2	2	-1	0	0	0	2	0	2	0	0	2	0	0	2	0	2	0
7B_702321679	2	0	2	0	2	0	2	2	0	0	0	0	2	2	0	2	2	0	0	0	2	0	0	0	2	2	2	0	2	0	0	2	2	0	0	0	0	2	0	2	0	0	-1	0	0	2	0	2	0
4D_481390025	2	2	2	2	2	2	0	2	2	2	0	2	0	2	2	2	2	2	2	2	2	2	2	2	2	2	0	2	2	2	0	2	2	2	2	2	2	2	2	2	0	2	2	2	2	2	0	2	2
4D_477856997	2	2	2	2	2	2	0	2	2	2	0	2	0	2	2	2	2	2	2	2	2	2	2	2	2	2	0	2	2	2	2	2	2	2	2	2	2	2	2	2	0	2	2	2	2	2	2	2	2
4D_433505595	2	2	2	2	2	2	0	2	2	2	2	2	0	2	2	2	2	2	2	2	2	2	2	2	2	2	0	2	2	2	2	2	2	2	0	2	2	2	2	2	2	2	2	2	2	2	2	2	2
4D_430788350	2	2	2	2	2	2	0	2	2	2	2	2	0	2	2	2	2	2	2	2	2	2	2	2	2	2	0	2	2	2	2	2	2	2	0	2	2	2	2	2	2	2	2	2	2	2	2	2	2
4D_412935575	2	2	2	2	2	2	0	2	2	2	2	2	0	2	2	2	2	2	2	2	2	2	2	2	2	2	0	2	2	2	2	2	2	2	0	2	2	2	2	2	2	2	2	2	2	2	2	2	2
4D_414822362	2	2	2	2	2	2	0	2	2	2	2	2	0	2	2	2	2	2	2	2	2	2	2	2	2	2	0	2	2	2	2	2	2	2	0	2	2	2	2	2	2	2	2	2	2	2	2	2	2
4D_403202323	2	-1	2	2	2	2	0	2	2	2	2	2	0	2	2	2	2	2	2	2	2	2	2	2	2	2	0	2	2	2	2	2	2	-1	0	2	2	2	2	2	2	2	2	2	2	2	2	2	2
4D_370158981	2	2	2	2	2	2	0	2	2	2	2	2	2	2	2	2	2	2	2	2	2	2	2	2	2	2	0	2	2	2	2	2	2	-1	0	2	2	2	2	2	2	2	2	2	2	2	2	2	2
4D_184747096	2	-1	2	2	2	2	0	2	2	2	2	2	2	2	2	2	2	2	2	2	2	2	2	2	2	2	0	2	2	2	2	2	2	2	0	2	2	2	2	2	2	2	2	2	2	2	2	2	2
4D_101443068	2	2	2	2	2	2	0	2	2	2	2	2	2	2	2	2	2	2	2	2	2	2	2	2	2	2	0	2	2	2	2	2	2	2	0	2	2	2	2	2	2	2	2	2	2	2	2	2	2
4D_317656896	2	2	2	2	2	2	0	2	2	2	2	2	2	2	2	2	2	2	2	2	2	2	2	2	2	2	0	2	2	2	2	2	2	2	0	2	2	2	2	2	2	2	2	2	2	2	2	2	2
4D_98078212	2	2	2	2	2	2	0	2	2	2	2	2	2	2	2	2	2	2	2	2	2	2	2	2	2	2	0	2	2	2	2	2	2	2	0	2	2	2	2	2	2	2	2	2	2	2	2	2	2
4D_82691610	2	2	2	2	2	2	0	2	2	2	2	2	2	2	2	2	2	2	2	2	2	2	2	2	2	2	0	2	2	2	2	2	2	2	2	2	2	2	2	2	2	2	2	2	2	2	2	2	2
4D_61613658	2	2	2	2	2	2	0	2	2	2	2	2	2	2	2	2	2	2	2	2	2	2	2	2	2	2	0	2	2	2	2	2	2	2	2	2	2	2	2	2	2	2	2	2	2	2	2	2	2
4D_65859359	2	2	2	2	2	2	0	2	2	2	2	2	2	2	2	2	2	2	2	2	2	2	2	2	2	2	0	2	2	2	2	2	2	2	2	2	2	2	2	2	2	2	2	2	2	2	2	2	2
4D_48697668	2	2	2	2	2	2	0	2	2	2	2	2	2	2	2	2	2	2	2	2	2	2	2	2	2	2	0	2	2	2	2	2	2	2	2	2	2	2	2	2	2	2	2	2	2	2	2	2	2
4D_28547729	2	2	2	2	2	2	0	2	2	2	2	2	2	2	2	2	2	2	2	2	2	2	2	2	2	2	2	2	2	2	2	2	2	2	2	2	2	2	2	2	2	2	2	2	2	2	2	2	2
4D_15772687	2	2	2	2	2	2	0	2	2	2	0	2	2	2	2	2	2	2	2	2	2	2	2	2	2	2	2	2	2	2	2	2	2	2	2	2	2	2	2	2	2	2	2	2	2	2	2	2	2
2D_609764046	2	2	0	2	2	0	2	2	2	2	0	2	2	0	2	2	2	0	2	0	2	0	2	2	2	0	2	2	0	0	2	0	2	0	2	0	2	2	0	2	2	0	-1	0	2	2	2	0	0
2D_601107080	2	2	0	2	2	0	2	2	2	2	0	2	2	0	2	2	2	0	2	0	2	0	2	2	2	0	2	2	0	0	2	0	2	0	2	0	2	2	0	0	2	0	0	0	2	2	2	0	0
2D_607079191	2	2	0	2	2	0	2	2	2	2	0	2	2	0	-1	2	2	0	2	0	2	0	2	2	2	0	2	2	0	0	2	0	2	0	2	0	2	2	0	0	2	0	0	0	2	2	2	0	0
2D_599099549	2	2	0	2	2	0	2	2	2	2	0	2	2	0	2	2	2	0	2	0	2	0	2	2	2	0	2	2	0	0	2	0	2	0	2	0	2	2	0	0	2	0	-1	0	2	2	2	0	0
6D_444495223	0	0	0	0	2	0	0	0	0	0	0	0	0	0	2	2	2	0	2	0	0	0	2	0	0	0	2	2	2	0	2	2	0	0	2	0	0	2	0	0	2	0	2	2	2	2	2	0	2
6D_439146733	0	0	0	0	2	0	0	0	0	0	0	0	0	0	2	2	2	0	2	0	0	0	2	0	0	0	2	2	2	0	2	2	0	0	2	0	0	2	0	0	2	0	2	2	2	2	2	0	2
6D_435430068	0	0	0	0	2	0	0	0	0	0	0	0	0	0	2	2	2	0	2	0	0	0	2	0	0	2	2	2	2	0	2	2	0	0	2	0	0	2	0	0	2	2	2	2	2	2	2	0	2
6D_432970493	0	0	0	0	2	0	0	0	0	0	0	0	0	0	2	2	2	0	2	0	2	0	2	0	0	2	2	2	2	0	2	2	0	0	2	2	0	0	0	0	2	2	2	2	2	2	2	0	2
6D_410156938	0	0	0	2	2	0	0	0	0	0	0	0	0	0	2	2	2	0	0	0	2	0	2	0	0	2	2	2	2	2	2	2	0	0	2	2	0	0	2	0	2	2	2	0	2	2	2	0	2
6D_407747437	0	0	0	2	2	0	0	0	0	0	0	0	0	0	2	2	2	0	0	0	2	0	2	0	0	2	2	2	2	2	2	2	0	0	2	2	0	0	2	0	2	2	2	0	2	2	2	0	2
6D_395706865	0	0	0	2	2	0	0	0	0	0	0	0	0	0	2	2	2	0	0	2	2	0	2	0	0	2	2	2	2	2	2	2	0	-1	2	2	0	0	2	0	2	2	2	0	2	2	2	0	2
6D_387758186	0	0	0	2	2	0	2	0	0	0	0	0	0	0	2	2	2	0	0	2	2	0	2	0	0	2	-1	2	2	-1	2	2	0	-1	2	2	0	0	2	0	2	0	2	0	-1	2	2	0	2
6D_341641672	2	0	0	2	2	0	2	0	0	0	0	0	0	0	2	2	2	0	0	2	2	0	2	-1	0	2	0	2	2	2	2	2	0	-1	2	2	0	0	2	0	2	0	2	0	2	2	2	0	2
6D_312130082	2	0	0	2	2	0	2	0	0	0	0	0	0	0	2	2	2	0	0	2	2	0	2	0	0	2	0	2	2	2	2	2	0	-1	2	2	0	0	2	0	2	0	2	0	2	2	2	0	2
6D_287597807	2	0	0	2	2	0	2	0	0	0	0	0	0	0	2	2	2	0	0	2	2	0	2	0	0	2	0	2	2	2	2	2	0	0	2	2	0	0	2	0	2	0	0	0	2	2	2	0	2
6D_151832183	2	0	0	2	2	0	2	0	0	0	0	0	0	0	2	2	2	0	0	2	2	0	2	0	0	2	0	2	2	2	2	2	0	0	2	2	0	0	2	0	2	0	0	0	2	2	2	0	2
6D_37666071	2	0	0	2	2	0	2	0	0	0	0	0	0	0	2	2	2	0	0	2	2	0	2	0	0	2	0	2	2	2	2	2	0	0	2	2	0	0	2	0	2	0	0	2	2	2	2	0	0
7A_732187469	2	0	2	0	0	2	2	0	0	2	2	0	0	0	2	0	0	2	2	0	0	0	0	0	2	2	0	2	2	0	2	2	2	2	0	0	2	0	2	0	2	0	0	0	0	2	2	0	2
7A_717099059	2	0	0	0	0	0	0	0	0	0	0	2	0	0	0	0	0	2	2	0	0	0	0	0	0	2	0	0	2	0	2	0	2	2	0	0	2	2	2	0	2	0	0	0	0	2	2	0	2
7A_701804474	2	0	2	0	0	0	0	2	0	0	0	2	0	2	0	0	2	2	2	0	0	0	0	0	0	2	2	2	2	0	2	0	2	2	0	2	2	0	2	0	2	0	0	0	0	2	2	2	2
7A_701630362	2	0	2	0	0	0	0	2	0	0	0	2	0	2	0	0	2	2	2	0	0	0	0	0	0	2	2	2	2	0	2	0	2	2	0	2	2	0	2	0	2	0	0	0	0	2	2	2	2
7A_701630339	2	0	2	0	0	0	0	2	0	0	0	2	0	2	0	0	2	2	2	0	0	0	0	0	0	2	2	2	2	0	2	0	2	2	0	2	2	0	2	0	2	0	0	0	0	2	2	2	2
7A_696743124	2	0	2	0	0	2	0	2	0	0	0	2	0	2	0	0	2	2	2	0	0	0	0	2	0	2	2	2	2	2	2	0	2	2	0	2	2	0	0	0	0	0	0	0	0	0	2	2	0
7A_696743310	2	0	2	0	0	2	0	2	0	0	0	2	0	2	0	0	2	2	2	0	0	0	0	2	0	2	2	2	2	2	2	0	2	2	0	2	2	0	0	0	0	0	0	0	0	0	2	2	0
2A_23391890	2	0	2	2	0	2	2	0	2	0	0	0	2	0	2	2	2	0	0	2	0	0	0	0	0	2	0	2	2	2	0	0	2	2	0	2	2	0	0	2	2	0	0	0	0	2	0	0	0
2A_10734828	2	0	2	2	0	0	2	0	2	0	0	0	2	0	2	2	2	0	0	2	0	0	0	0	0	2	0	2	2	2	0	0	2	2	0	2	2	0	0	2	2	0	0	0	0	2	0	0	0
2A_10734875	2	0	2	2	0	0	2	0	2	0	0	0	2	0	2	2	2	0	0	2	0	0	0	0	0	2	0	2	2	2	0	0	2	2	0	2	2	0	0	2	2	0	0	0	0	2	0	0	0
2A_18910375	2	0	2	2	0	0	2	0	2	0	0	0	2	0	2	2	2	0	0	0	0	0	0	0	0	2	0	2	2	2	0	0	2	0	0	2	2	0	0	2	2	0	0	0	0	2	0	0	0
2A_14470928	2	0	2	2	0	0	2	0	2	0	0	0	2	0	2	2	2	0	0	0	0	0	0	0	0	2	0	2	2	2	0	0	2	0	0	2	2	0	0	2	2	0	0	0	0	2	0	0	0
2A_7718037	2	0	2	2	0	0	2	0	2	0	0	0	2	0	2	2	2	0	0	0	0	0	0	0	0	2	0	2	2	2	2	0	2	2	0	2	2	0	0	2	2	0	0	0	0	2	2	0	0
2A_5357700	2	0	2	2	0	0	2	0	2	0	0	0	2	0	2	2	2	0	0	0	2	0	0	0	0	2	0	2	2	2	2	0	2	2	0	2	2	0	0	2	2	0	0	0	0	2	2	0	0
3B_17569521	0	0	2	0	2	0	2	2	2	0	0	0	2	0	2	2	2	2	0	0	0	2	0	2	2	0	2	2	2	2	0	0	0	0	0	0	0	0	0	0	2	2	0	0	0	0	0	2	2
3B_16226876	0	0	2	0	2	0	2	2	2	0	0	0	2	0	2	2	2	2	0	0	0	2	0	2	2	0	2	0	2	2	0	0	0	0	0	0	0	0	0	0	2	2	0	0	0	0	0	2	2
3B_17569487	0	0	2	0	2	0	-1	2	2	0	0	0	2	0	2	2	2	2	0	0	0	2	0	2	2	0	2	2	2	2	0	0	0	0	0	0	0	0	0	0	2	2	0	0	0	0	0	2	2
3B_6931162	0	0	2	0	2	0	0	2	2	0	0	0	2	0	2	2	2	2	0	0	0	2	0	2	2	2	2	0	0	2	0	0	0	0	0	0	0	0	0	0	2	2	0	0	0	0	0	2	2
5D_506205575	0	2	0	0	2	0	2	2	0	2	0	0	2	0	0	2	0	2	0	2	2	2	0	0	2	0	2	0	0	0	2	0	0	2	0	2	2	0	0	0	0	2	2	2	0	2	2	2	0
5D_505936864	0	2	0	0	2	0	2	2	0	2	0	0	2	0	0	2	0	2	0	2	2	2	0	0	2	0	2	0	0	0	2	0	0	2	0	2	2	0	0	0	0	2	2	2	0	2	2	2	0
5D_502110661	0	2	0	0	2	0	2	2	0	2	0	0	2	0	0	2	0	2	0	2	2	2	0	0	2	0	2	0	2	0	2	0	0	2	0	2	2	0	0	0	0	2	2	2	0	2	2	2	0
5D_478616977	0	2	0	0	2	0	2	0	0	0	0	0	2	0	0	2	0	2	0	0	2	2	0	2	2	2	2	0	2	0	0	0	2	-1	0	0	2	0	0	0	0	2	2	0	0	0	0	2	0
5D_472572763	0	2	0	0	2	0	2	0	0	0	0	0	2	0	0	2	0	0	0	0	0	2	0	2	2	2	2	0	0	0	0	0	0	2	0	0	2	0	0	0	0	2	2	0	0	0	0	2	0
5D_462901053	0	-1	0	0	2	0	2	0	0	0	0	0	2	0	0	2	2	0	0	0	0	2	0	2	2	2	2	0	0	0	0	0	0	-1	0	0	2	0	0	0	0	2	2	0	0	0	0	2	0
7A_15677256	0	0	2	2	2	2	0	2	0	0	0	0	2	0	2	0	2	0	0	0	2	0	0	2	2	2	2	2	2	0	2	2	2	0	0	2	2	0	0	2	0	2	0	2	2	2	2	2	2
7A_14631345	2	0	2	2	2	2	0	2	0	0	0	0	2	0	2	0	2	0	0	0	2	0	0	2	2	2	2	2	2	0	2	2	2	0	0	2	2	0	2	2	0	2	0	2	2	2	2	2	2
7A_14631302	2	0	2	2	2	2	0	2	0	0	0	0	2	0	2	0	2	0	0	0	2	0	0	2	2	2	2	2	2	0	2	2	2	0	0	2	2	0	2	2	0	2	0	2	2	2	2	2	2
7A_6846747	2	0	2	2	2	2	0	2	0	0	0	0	2	0	2	0	0	2	2	0	2	0	0	0	0	2	2	2	2	0	2	2	2	0	2	0	2	0	2	2	0	2	0	2	2	2	2	2	2
7A_8367990	2	0	2	2	2	2	0	2	0	0	0	0	2	0	2	0	0	2	2	0	2	0	0	0	0	2	2	2	2	0	2	2	2	0	2	0	2	0	2	2	0	2	0	2	2	2	2	2	2
7A_6493016	2	0	2	2	2	0	0	2	0	0	0	0	2	0	2	0	0	2	2	0	2	0	0	0	0	2	2	2	2	0	0	2	2	0	2	0	2	0	0	2	0	2	0	2	2	2	0	2	2
7A_6498257	2	0	2	2	2	0	0	2	0	0	0	0	2	0	2	0	0	2	2	0	2	0	0	0	0	2	2	2	2	0	0	2	2	0	2	0	2	0	0	2	0	2	0	2	2	2	0	2	2
6A_614543947	2	0	0	0	0	0	-1	2	2	2	2	0	0	2	2	2	2	2	2	2	0	2	0	0	0	2	2	2	0	0	0	2	0	0	0	2	2	0	0	-1	0	0	2	2	2	0	0	2	0
6A_614361189	2	0	0	0	0	0	0	2	2	2	2	0	0	2	2	2	2	2	2	2	0	2	0	0	0	2	2	2	0	0	0	2	0	0	0	2	2	0	0	2	0	0	2	2	2	0	0	2	0
6A_614361200	2	0	0	0	0	0	0	2	2	2	2	0	0	2	2	2	2	2	2	2	0	2	0	0	0	2	2	2	0	0	0	2	0	0	0	2	2	0	0	2	0	0	2	2	2	0	0	2	0
6A_614543838	2	0	0	0	0	0	0	2	2	2	2	0	0	2	2	2	2	2	2	2	0	2	0	0	0	2	2	2	0	0	0	2	0	0	0	2	2	0	0	2	0	0	2	2	2	0	0	2	0
6A_609309941	2	2	0	0	0	0	0	2	2	2	2	0	0	2	2	2	2	2	2	2	0	2	0	0	0	2	2	2	0	2	0	2	0	0	0	0	2	0	2	2	0	2	2	2	0	0	0	2	2
6A_608115572	2	2	0	0	0	0	0	2	2	2	2	0	0	2	0	2	2	2	2	2	0	2	0	0	0	2	2	2	0	2	0	2	0	0	0	0	2	0	2	2	0	2	-1	2	0	0	0	2	2
6A_605342228	2	2	0	0	0	0	0	2	2	2	2	0	0	2	0	2	2	2	2	2	0	2	2	0	0	2	2	2	0	0	2	2	0	0	0	0	2	0	2	2	0	2	2	2	0	0	2	2	2
6A_605871649	2	2	0	0	0	0	-1	2	2	2	2	0	0	2	0	2	2	2	2	2	0	2	2	0	0	2	2	2	0	0	2	2	0	0	0	0	2	0	2	2	0	2	2	2	-1	0	2	2	2
2D_18237499	2	2	0	2	2	0	-1	2	2	2	0	2	0	2	2	2	2	0	2	0	0	0	0	2	0	0	2	2	0	0	2	0	2	2	2	2	0	0	2	2	2	0	0	2	2	2	2	0	2
2D_15610320	2	2	0	2	2	0	2	2	2	2	0	2	0	2	2	2	2	0	2	0	0	0	0	2	0	0	2	2	0	0	2	0	2	2	2	2	0	0	2	2	2	0	2	2	2	2	2	0	2
[truncated: 152 more columns]
